# Supplementary material for: Observational cross-sectional study of 5279 bronchoscopy results for the practical effectiveness of various biopsy techniques in the diagnosis of lung diseases with particular emphasis on lung cancer
Source: PubMed Central journal article supplement — BMJ Open. 2021 Aug 8;11(8):e043820. doi: 10.1136/bmjopen-2020-043820 (PMC8354294; doi:10.1136/bmjopen-2020-043820), 2021-08-08
Supplement: bmjopen-2020-043820.draft_revisions.pdf [file bmjopen-2020-043820.draft_revisions.pdf]

# BMJ Open

BMJ Open is committed to open peer review. As part of this commitment we make the peer review history of every article we publish publicly available.

When an article is published we post the peer reviewers' comments and the authors' responses online. We also post the versions of the paper that were used during peer review. These are the versions that the peer review comments apply to.

The versions of the paper that follow are the versions that were submitted during the peer review process. They are not the versions of record or the final published versions. They should not be cited or distributed as the published version of this manuscript.

BMJ Open is an open access journal and the full, final, typeset and author-corrected version of record of the manuscript is available on our site with no access controls, subscription charges or pay-per-view fees (<http://bmjopen.bmj.com>).

If you have any questions on BMJ Open's open peer review process please email [info.bmjopen@bmj.com](mailto:info.bmjopen@bmj.com)

# BMJ Open

## The yield of bronchoscopy in the diagnosis of lung diseases.

|                               |                                                                                                                                                                                                                                                                                                                                                                                                                                                                                                                                                                                                                                           |
|-------------------------------|-------------------------------------------------------------------------------------------------------------------------------------------------------------------------------------------------------------------------------------------------------------------------------------------------------------------------------------------------------------------------------------------------------------------------------------------------------------------------------------------------------------------------------------------------------------------------------------------------------------------------------------------|
| Journal:                      | <i>BMJ Open</i>                                                                                                                                                                                                                                                                                                                                                                                                                                                                                                                                                                                                                           |
| Manuscript ID                 | bmjopen-2020-043820                                                                                                                                                                                                                                                                                                                                                                                                                                                                                                                                                                                                                       |
| Article Type:                 | Original research                                                                                                                                                                                                                                                                                                                                                                                                                                                                                                                                                                                                                         |
| Date Submitted by the Author: | 14-Aug-2020                                                                                                                                                                                                                                                                                                                                                                                                                                                                                                                                                                                                                               |
| Complete List of Authors:     | Błach, Justyna; Medical University of Lublin,<br>Frąk, Małgorzata; Medical University of Lublin<br>Krawczyk, Pawel; Medical University of Lublin<br>Pankowski, Juliusz; Specialist Hospital for Lung Diseases "Rebirth" Klara Jelska<br>Pankowski, Adam; SilverSoft<br>Buczowski, Jarosław; Medical University of Lublin<br>Szlubowski, Artur; Specialist Hospital for Lung Diseases "Rebirth" Klara Jelska<br>Siwiec, Jan; Medical University of Lublin<br>Krudysz, Piotr; Izer-Med<br>Michnar, Marek; Medical University of Lublin<br>Kieszko, Robert; Medical University of Lublin<br>Milanowski, Janusz; Medical University of Lublin |
| Keywords:                     | Bronchoscopy < THORACIC MEDICINE, Respiratory tract tumours < ONCOLOGY, RESPIRATORY MEDICINE (see Thoracic Medicine)                                                                                                                                                                                                                                                                                                                                                                                                                                                                                                                      |
|                               |                                                                                                                                                                                                                                                                                                                                                                                                                                                                                                                                                                                                                                           |

SCHOLARONE™  
Manuscripts

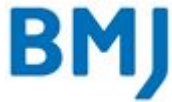

I, the Submitting Author has the right to grant and does grant on behalf of all authors of the Work (as defined in the below author licence), an exclusive licence and/or a non-exclusive licence for contributions from authors who are: i) UK Crown employees; ii) where BMJ has agreed a CC-BY licence shall apply, and/or iii) in accordance with the terms applicable for US Federal Government officers or employees acting as part of their official duties; on a worldwide, perpetual, irrevocable, royalty-free basis to BMJ Publishing Group Ltd ("BMJ") its licensees and where the relevant Journal is co-owned by BMJ to the co-owners of the Journal, to publish the Work in this journal and any other BMJ products and to exploit all rights, as set out in our [licence](#).

The Submitting Author accepts and understands that any supply made under these terms is made by BMJ to the Submitting Author unless you are acting as an employee on behalf of your employer or a postgraduate student of an affiliated institution which is paying any applicable article publishing charge ("APC") for Open Access articles. Where the Submitting Author wishes to make the Work available on an Open Access basis (and intends to pay the relevant APC), the terms of reuse of such Open Access shall be governed by a Creative Commons licence – details of these licences and which [Creative Commons](#) licence will apply to this Work are set out in our licence referred to above.

Other than as permitted in any relevant BMJ Author's Self Archiving Policies, I confirm this Work has not been accepted for publication elsewhere, is not being considered for publication elsewhere and does not duplicate material already published. I confirm all authors consent to publication of this Work and authorise the granting of this licence.

## The yield of bronchoscopy in the diagnosis of lung diseases

Justyna Błach<sup>1,2\*</sup>, Małgorzata Frąk<sup>1\*</sup>, Paweł Krawczyk<sup>1</sup>, Juliusz Pankowski<sup>3</sup>, Adam Pankowski<sup>4</sup>, Jarosław Buczkowski<sup>1,5</sup>, Artur Szlubowski<sup>3,6</sup>, Jan Siwiec<sup>1</sup>, Piotr Krudys<sup>6</sup>, Marek Michnar<sup>1</sup>, Robert Kieszko<sup>1</sup>, Janusz Milanowski<sup>1</sup>

\* authors equally contributing

1. Department of Pneumonology, Oncology and Allergology, Medical University of Lublin, 20-954 Lublin; Poland
2. Department of Clinical Immunology, Medical University of Lublin, 20-954 Lublin; Poland
3. Specialist Hospital for Lung Diseases "Rebirth" Klara Jelska, 34-500 Zakopane, Poland
4. SilverSoft, Warszewska 64/1, 72-004 Pilchowo, Szczecin, Poland
5. Department of Lung Diseases and Intensive Care, Independent Public Provincial John of God Hospital in Lublin, 20-400 Lublin, Poland
6. Izerski Pulmonology and Chemotherapy Center "IZER-MED", 58-580 Szklarska Poręba, Poland

Short title: **The yield of bronchoscopy in the diagnosis of lung diseases**

### Corresponding author:

Justyna Błach MD

Department of Pneumonology, Oncology and Allergology

Medical University of Lublin, Poland

Jaczewskiego 8, 20-954 Lublin, Poland

tel. +48 81 724 42 93

e-mail: [justynablach91@gmail.com](mailto:justynablach91@gmail.com)

## Abstract

### Introduction

Bronchoscopy is the main method in the diagnosis of various lung diseases. EBUS-TBNA is the most modern bronchoscopic technique useful in diagnosis and staging of lung cancer (LC).

### Objectives

The aim of the study was to assess the yield of bronchoscopy in the diagnosis of various respiratory diseases. Especially, we examined the possibility of obtaining diagnostic material using bronchoscopic techniques in patients with various pathomorphological types of LC.

### Patients and Methods

The results of pathomorphological examinations from 5279 bronchoscopies performed in 2016-2018 were analyzed. Clinical and demographic factors were analyzed using the Fisher  $\chi^2$  test.

### Results

5279 patients (1892 women, 3387 men) were diagnosed due to various respiratory symptoms. LC was confirmed in 36.42% of patients, reactive lymph nodes – in 16.06%, sarcoidosis – in 4.12%, IPF – in 0.19%, non-LC metastases – in 2.39%. 40.81% of patients had no definitive diagnosis. SCC was most often diagnosed (32.07%), then AC, (30.61%), SCLC (25.83%) and NSCLC NOS (11.49%). Diagnosis of SCC was obtained significantly more often ( $\chi^2=43.143$ ,  $p<0.000001$ ) by endobronchial (41.09%) than by transbronchial biopsies (26.62%). Diagnosis of AC or NDRP NOS was significantly more often ( $\chi^2=20.394$ ,  $p<0.000007$  and  $\chi^2=3.902$ ,  $p<0.05$ , respectively) observed in transbronchial biopsies (34.31% and 12.6%) than in endobronchial biopsies (24.52% and 9.64%).

### Conclusion

The use of bronchoscopy in the diagnosis of various lung diseases has many limitations. SCLC and SCC may be more common in Poland than in other European countries and in US. Effectiveness of EBUS-TBNA and forceps biopsy is strongly affected by tumor localization and type of cancer.

**Key words:** lung cancer; bronchoscopy; endobronchial biopsy; EBUS-TBNA; EUS-FNA

## Article summary

### *Strengths and limitations of this study*

1. This is one of the largest bronchoscopy methods effectiveness research in routine clinical practice.
2. Endobronchial biopsy is more effective in the diagnosis of squamous cell carcinoma (central tumors). Whereas, EBUS-TBNA and EUS-FNA has higher efficiency in the detection of adenocarcinoma (peripheral tumors).
3. Study shows that advanced small cell lung cancer may be underestimated.
4. The study revealed that EBUS-TBNA value in daily clinical practice differed from that in clinical trials.
5. It was not possible to determine the final diagnosis for all patients in this large group (5279 cases). Not distinguish between material collected by EBUS-TBNA and EUS-FNA. The lack of detailed clinical and radiological characteristics of all patients who underwent the bronchoscopy procedures.

## Introduction

Epidemiological analyses indicate that lung cancer (LC) is the most common cause of cancer-related death. It is usually diagnosed in an unresectable, advanced stage. [1, 2] LC is the most common cancer in men and the third most common in women. In 2018, there were more than 2 million new cases of lung cancer worldwide. [3]

In the United States from 2004 to 2009, a total of 1,096,276 lung cancer cases were diagnosed and reported. This American study investigated the histologic type of lung cancer and demographic characteristics of the patients. The incidence of individual types of LC was as follows: small cell lung cancer (SCLC) – 14.9% of cases, squamous cell carcinoma (SCC) – 21.9% of cases, adenocarcinoma (AC) – 37.1% of cases and large cell carcinoma (LCC) – 3.2% of patients. [4]

It is difficult to obtain accurate epidemiological data on the occurrence of individual pathomorphological types of LC in advanced stages. Such data is only available on patients undergoing surgery in earlier stages of the disease. 17,783 patients diagnosed and operated in

1  
2  
3 Polish thoracic surgery centers were registered in the National Lung Cancer Registry in the  
4 years 2014-2018. This group includes: 48.7% of patients with AC, 40.8% of patients with  
5 SCC, 6.45% of patients with LCC, 2.1% of patients with adenosquamous cell carcinoma,  
6 1.05% of patients with SCLC and 0.9% of patients with non-otherwise specified (NOS) non-  
7 small cell lung cancer (NSCLC). This material included a low percentage of patients with  
8 SCLC (usually an inoperable type of lung cancer) and patients with NSCLC-NOS (large  
9 surgical material is easy for pathomorphological examination). In addition, LCC should be  
10 diagnosed only in the surgical material. Therefore, this type of cancer is almost absent in  
11 patients with advanced lung cancer (it could not be diagnosed in the small specimens). [2]

12  
13  
14  
15  
16  
17  
18  
19 Due to different locations and tumor types, varied approaches are required to cancer  
20 diagnosis in different compartments of the lung or metastatic lymph nodes. Bronchoscopy is  
21 an appropriate method for detecting LC. Endobronchial ultrasound-guided with transbronchial  
22 needle aspiration (EBUS-TBNA) and endoscopy ultrasound with fine needle aspiration (EUS-  
23 FNA) are preferred for mediastinal lymph nodes assessment for evaluation of N-stage in  
24 patients with NSCLC. [5] However, endobronchial forceps biopsy or cryobiopsy may be  
25 preferred mainly in diagnosis of the central tumors. These two methods could be used in  
26 sampling visible tumors localized in central airways but also peripherally to the main bronchi,  
27 i.e. in lobar or even segmental bronchi. The sensitivity of detecting lung cancer by  
28 bronchoscopy varies from 34% to 88% depending on the size and location of the tumor and  
29 preliminary diagnosis of the patients. [6] Meta-analysis of 18 studies which included a total of  
30 1,201 patients with LC diagnosed by ultrasound-guided fine needle aspiration showed  
31 sensitivity of 83% (range 45-100%) and specificity of 97% (range 88-100%) of these  
32 methods. [7] However, all false negative results delay cancer diagnosis and force the  
33 repetition of diagnostic procedures including surgery. While, earlier detection of the lung  
34 cancer gives patients the chance for better treatment. [8]

## 35 36 37 38 39 40 41 42 43 44 45 46 **Aim**

47  
48 The aim of our study was to assess the yield of bronchoscopy in the diagnosis of  
49 different lung diseases in daily clinical practice. Especially, we devoted special attention to  
50 the possibility of diagnosis of individual pathomorphological types of LC with various  
51 techniques use for collecting materials during bronchoscopy.

## 52 53 54 55 **Material and methods**

56  
57 In our observational cross-sectional study, we analyzed the results of  
58 pathomorphological examination carried out on the material obtained by the 5279  
59 bronchoscopies performed in 2016-2018. Those bronchoscopies were performed in three  
60

1  
2  
3 Polish pulmonology departments. The study included 1892 women and 3387 men with  
4 median age of 65 years.

5  
6 Various diseases of the respiratory system were indication for bronchoscopy: 3127  
7 (59.2%) patients had suspicion of chest tumor in computed tomography, 882 (16.7%) patients  
8 demonstrated hilar lymphadenopathy, 205 (3.9%) patients had suspicion of sarcoidosis and 20  
9 (0.4%) patients had suspicion of pulmonary fibrosis. Other indications for bronchoscopy  
10 occurred in 1045 (19.8%) patients (e.g. suspicion of tuberculosis, chronic cough, hemoptysis,  
11 etc.). After receiving the diagnosis, we selected a population of patients with lung cancer and  
12 divided them to groups of patients with different cancer types (squamous cell lung cancer,  
13 adenocarcinoma, large cell carcinoma, not otherwise specified NSCLC and small cell lung  
14 cancer). Then we assessed the prevalence of different types of LC in the materials obtained  
15 with various bronchoscopic procedures.

16  
17 In 3565 (67.5%) patients, EBUS-TBNA and EUS-FNA was performed and  
18 cytological material archived in a cytoblock was obtained. In 1346 (25.5%) patients, EBUS-  
19 TBNA (without EUS-FNA) was the only diagnostic procedure. In the remaining patients,  
20 EBUS-TBNA was supplemented by EUS-FNA. There were no patients in whom EUS-FNA  
21 would be the only diagnostic method. 1714 (32.5%) patients had non-ultrasound-guided  
22 bronchoscopy with the forceps biopsy of endobronchial lesions allowing to obtain a small  
23 histological specimen. The method for tissue sampling was chosen based on the location of  
24 the lesions and mediastinal or hilar lymph node status. Forceps biopsies were performed using  
25 Olympus BF-1T180 and Pentax EB-1970K bronchoscopes, EBUS-TBNA – using Olympus  
26 BF-UC180F and Pentax EB-1970UK bronchoscopes (22-gauge needles), and EUS-FNA –  
27 using Olympus GF-UCT180 endoscope. Premedication for bronchoscopy was under local or  
28 general anesthesia, depending on the situation.

#### 29 30 31 32 33 34 35 36 37 38 39 40 41 42 43 44 45 46 47 48 49 50 51 52 53 54 55 56 57 58 59 60

#### Statistical analysis

Clinical and demographic factors were analyzed using the Pearson's Chi-square test. P-values below 0.05 were considered significant. The percentages reflect the relative number of all lung cancer patients diagnosed with a particular procedure. The evaluation of relative diagnostic yield (sensitivity) of different bronchoscopic procedures could not be done because, in our study, it was not possible to verify the final diagnosis of analyzed patients. We only analyzed the results of the first-time bronchoscopy. Further diagnostic procedures were often not performed in our clinical centers. The following diagnostic procedures were carried out in various clinical centers throughout Poland.

#### Ethics approval



1  
2  
3 The protocol of the study was approved by the Committee of Ethics and Research at the Medical  
4 University of Lublin (KE-0254/5/2018).

## 6 Results

7  
8 Lung cancer was confirmed in group of 1923 (36.42%) patients, including 1280 men  
9 and 643 women. Only reactive lymph nodes were found in 16.06% of the patients, sarcoidosis  
10 was diagnosed in 4.13% of the patients, idiopathic pulmonary fibrosis – in 0.19% of the  
11 patients, metastases to the lungs from other organs – in 2.39% of the patients. 40.81% of the  
12 patients had no definitive diagnosis (Figure 1). Lung cancer was confirmed in 51% of patients  
13 with suspected tumor in computed tomography. While, in the group of patients with hilar  
14 lymphadenopathy, lung cancer was diagnosed in only 10.1% of cases.

15  
16 Among patients with lung cancer, squamous cell carcinoma (32.07%) was most often  
17 diagnosed, then adenocarcinoma (30.61%), small cell lung cancer (25.83%) and NSCLC-  
18 NOS (11.49%) (Figure 2). SCLC and AC were significantly more frequent ( $\chi^2 = 8.649$ ,  $p =$   
19  $0.0033$  and  $\chi^2 = 21.128$ ,  $p < 0.000005$ , respectively) in women (29.97% and 37.42% of  
20 women with lung cancer) than in men (23.75% and 27.19% of male patients with lung  
21 cancer). Squamous cell carcinoma appeared significantly more often ( $\chi^2 = 41.881$ ,  $p <$   
22  $0.000001$ ) among male (36.95%) than among female (22.36%) patients with lung cancer  
23 (Figure 3). SCC was significantly more often ( $\chi^2 = 4.17$ ,  $p = 0.041$ ) diagnosed in the group of  
24 patients older than 65 years than in younger patients. Other pathomorphological types of lung  
25 cancer occurred with similar frequency in these two age groups.

26  
27 Endobronchial biopsies significantly more often ( $\chi^2 = 7.566$ ,  $p = 0.0059$ ) provided  
28 material for the diagnosis of lung cancer than the EBUS-TBNA and EUS-FNA procedures.  
29 42.35% of endobronchial biopsies and 33.6% of transbronchial and transesophageal biopsies  
30 provided material sufficient to diagnose lung cancer. Fine needle biopsy of lymph nodes  
31 enabled the diagnosis of lung cancer in 29.2% of cases, fine needle biopsy of lung tumor – in  
32 66.6% of cases, and forceps biopsy of bronchial mucosa lesions – in 48.2% of cases. These  
33 differences were statistically significant.

34  
35 Among patients with lung cancer, transbronchial or transesophageal biopsies  
36 compared to endobronchial biopsies were similarly effective ( $\chi^2 = 0.656$ ,  $p = 0.418$ ) in  
37 detecting SCLC (26.5% vs. 24.8%). On the other hand, the diagnosis of AC and NSCLC-  
38 NOS was obtained significantly more frequently ( $\chi^2 = 20.394$ ,  $p = 0.000006$  and  $\chi^2 = 3.902$ ,  $p$   
39  $= 0.0482$ ) in EBUS-TBNA and EUS-FNA compared to endobronchial biopsies (34.3% vs.  
40 24.52% and 12.6% vs. 9.6%, respectively). SCC was significantly more often ( $\chi^2 = 43.143$ ,  $p$   
41  $< 0.000001$ ) diagnosed in material obtained from forceps biopsy than in material from EBUS-  
42  
43  
44  
45  
46  
47  
48  
49  
50  
51  
52  
53  
54  
55  
56  
57  
58  
59  
60

1  
2  
3 TBNA and EUS-FNA (41.09% vs 26.62%) (Figure 4). Table 1 shows the effectiveness of  
4 bronchoscopy in the diagnosis of individual pathomorphological types of lung cancer  
5 depending on place of collecting the material.  
6  
7

## 8 **Discussion**

9

10 Our study on the yield of EBUS-TBNA and forceps biopsy in obtaining material for  
11 the diagnosis of various lung diseases is among the largest worldwide. The study points to  
12 numerous problems arising from the use of these techniques in routine clinical practice. We  
13 are aware of the many limitations of our study. First, we cannot determine the sensitivity and  
14 specificity of our methods, because it was not possible to determine the final diagnosis in this  
15 large group of patients (5279 cases). In addition, we could not distinguish between material  
16 collected by EBUS-TBNA and EUS-FNA. Thirdly, diagnosis of large cell carcinoma was not  
17 possible in small specimens (LCC was probably qualified to the NSCLC-NOS group). A  
18 limitation of our study was also the lack of detailed clinical and radiological characteristics of  
19 all patients who underwent the bronchoscopy procedures.  
20  
21  
22  
23  
24  
25  
26

27 However, we found that advanced small cell lung cancer may be more common in  
28 Poland than previously thought. This tumor is characterized by rapid growth and metastases,  
29 therefore, more often it could be diagnosed in advanced stages using bronchoscopic  
30 techniques. USG-guides transbronchial biopsy of lymph nodes and endobronchial biopsy had  
31 similar efficiency in SCLC detection. Furthermore, the difference in the percentage of patients  
32 with squamous cell carcinoma and adenocarcinoma diagnosed with endo- and transbronchial  
33 biopsies is noteworthy. In our study, most patients with adenocarcinoma were diagnosed with  
34 EBUS-TBNA or EUS-FNA of lymph nodes, while patients with squamous cell carcinoma  
35 were diagnosed more often based on examination of material from endobronchial biopsy  
36 (forceps biopsy). Endobronchial biopsy is more effective in the diagnosis of squamous cell  
37 carcinoma, because patients often had a centrally located tumor. Thus, we point to the  
38 problem that effective bronchoscopic procedures depends on the location of the primary  
39 tumor and the presence of metastases in the lymph nodes.  
40  
41  
42  
43  
44  
45  
46  
47  
48  
49

50 Schmid-Bindert et al. performed prospective study in group of 106 patients with  
51 NSCLC diagnosis. Small biopsies were collected by three different methods: forceps biopsy  
52 (44.6%), EBUS-TBNA (32.7%), and CT-guided core biopsy (22.8%). 38% of  
53 adenocarcinoma, 51% of squamous cell carcinoma and 11% of NSCLC-NOS were diagnosed  
54 using forceps biopsy. EBUS-TBNA results were 45% for adenocarcinoma, 30% for squamous  
55 cell carcinoma and 24% for NSCLC-NOS. [9]  
56  
57  
58  
59  
60

1  
2  
3 Many authors emphasize that the diagnosis of NSCLC-NOS is the most common in  
4 the case of material obtained from EBUS-TBNA. Esterbrook et al. found that NSCLC-NOS  
5 rate was 20.8% in EBUS-TBNA samples. Similar results were received by Navani et al. In  
6 group of 774 patients with known or suspected lung cancer, 23% of patients had a final  
7 diagnosis of NSCLC-NOS. [10, 11]  
8  
9

10  
11 Chin et al. reported that EBUS-TBNA is the most sensitive diagnostic methods for  
12 SCLC, because it allows to sample of specimens from mediastinal as well as submucosal  
13 lesions. They also mentioned that the quality of specimens obtained by needle aspiration is  
14 better than by forceps biopsies, which may contain crush artifacts. [12] In addition, other  
15 studies noticed that the sensitivity of EBUS-TBNA for SCLC detection was higher than for  
16 NSCLC diagnosis. [13, 14]  
17  
18

19  
20 Many authors raise the problem that forceps biopsy has low sensitivity in the diagnosis  
21 of lung cancer. Forceps biopsy has a diagnostic yield ranging between 65-82% [15, 16]. In  
22 our preliminary study conducted in 212 patients with lung cancer suspicion, we compared  
23 sensitivity and accuracy of routine bronchoscopy with endobronchial biopsy, EBUS-TBNA,  
24 and combination of EBUS-TBNA and EUS-FNA techniques. Sensitivity and accuracy of  
25 endobronchial biopsy vs EBUS-TBNA vs combination of transbronchial biopsies were 43%  
26 vs 44.3% vs 93.7% and 93.8% vs 94.7% and 94.8%, respectively. This demonstrates high  
27 usefulness of the combination of EBUS-TBNA and EUS-FNA in the diagnosis of lung cancer  
28 [17]. Verma et al. demonstrated sensitivity of EBUS-TBNA in cancer diagnosis of 91.4% in  
29 small group of 37 patients with lesions located adjacent to the trachea or lesions located  
30 adjacent to the main bronchi. [18] Tournoy et al. indicated that EBUS-TBNA has a sensitivity  
31 of 82% and low negative predictive value (23%). [19] The similar results received Zhao et al.  
32 for lesions located near the central airways. [20] Oki et al. showed that the combined  
33 endoscopic method with EBUS-TBNA and EUS-FNA with a single bronchoscope gives  
34 better results in staging of NSCLC than each technique alone. However, they mentioned that  
35 significant number of patients had false-negative EBUS-TBNA and EUS-FNA results.  
36 Moreover Oki et al. suggested that very important issue is bronchoscopists experience, which  
37 may cause differences in the results. [21] On the other hand, Wallace et al. showed a EBUS-  
38 TBNA sensitivity of only 69% in a group of 150 patients with lung cancer suspicion. [22]  
39  
40 Despite relatively low negative predictive value of EBUS-TBNA, there is an  
41 indication to perform other procedures (e.g. surgical procedures) for final diagnosis in a  
42 significant group of patients. In our study, 56.9% of patients who underwent bronchoscopy  
43 did not receive a definitive diagnosis of the diseases and they have been subjected to other  
44  
45  
46  
47  
48  
49  
50  
51  
52  
53  
54  
55  
56  
57  
58  
59  
60

1  
2  
3 diagnostic procedures or observations. We showed the results of all performed  
4 bronchoscopies and three different method of material collection (endobronchial biopsy and  
5 combination EBUS-TBNA and EUS-FNA). Moreover, unselected and heterogeneous patient  
6 population were recruited in three different hospitals that employ a total of 8 bronchoscopists.  
7  
8 In most studies, the evaluation of the usefulness of EBUS-TBNA and EUS-FNA for detecting  
9 malignancy was conducted in selected patients with high clinical suspicion of the tumor.  
10  
11 Small, preselected groups of patients with high risk of lung cancer could be the reason of the  
12 low negative predictive value of bronchoscopic procedures in these studies. Thus, these  
13 observation may not reflected the real clinical situation.  
14  
15  
16  
17  
18

19 In studies where population was heterogenic regarding the disease (lung cancer,  
20 sarcoidosis, tuberculosis), EBUS-TBNA had diagnostic value only in 60-75% of patients. [23]  
21 Lange et al. showed diagnostic results of EBUS-TBNA in only 61.4% of unselected patients  
22 undergoing routine diagnostic procedures. [24] Fournier et al. examined 185 patients with  
23 extrathoracic malignancy and mediastinal lymphadenopathy in real life practice.  
24 Pathomorfological types of malignancy were successfully identified using EBUS-TBNA in  
25 only 93 patients (50.3%). The diagnostic sensitivity, specificity, negative predictive value,  
26 and positive predictive value were 68.4%, 100%, 53.3%, and 100%, respectively. [25]  
27  
28  
29  
30  
31

### 32 **Conclusions**

33  
34 Comparing all these data we could conclude that bronchoscopy is not an ideal  
35 technique in the routine diagnosis of respiratory diseases. Our study proved that 41%  
36 bronchoscopy material was insufficient to perform reliable pathomorphological examination.  
37 This mainly concerned patients with suspected lung tumor or lymphadenopathy. Especially,  
38 here is a problem in the diagnosis of advanced lung tumors (mainly adenocarcinomas) using  
39 bronchoscopy if it is performed as the only procedure. We found that the EBUS-TBNA value  
40 in daily clinical practice differed from that in clinical trials. Therefore, precise estimation of  
41 the frequency of individual pathomorphological types of lung cancer based on material  
42 obtained bronchoscopically is not possible. It seems that the incidence of lung cancer with a  
43 typical peripheral localization (adenocarcinoma) may be underestimated in comparison to the  
44 incidence of lung cancer with a typical central localization (squamous cell carcinoma, SCLC).  
45  
46  
47  
48  
49  
50  
51  
52  
53  
54  
55  
56  
57  
58  
59  
60

### Authorship contribution statement:

Conception and design of the study: JB, MF, PK, JP. Administrative support: PK, JP, AP, JB, AS, JS, MM, PK, RK, JM. Provision of study material or patients: JP, AP, JB, AS, JS, MM, PK, RK, JM. Collection and assembly of data: JB, MF, PK, JP, AP, JB, AS, JS, MM, PK, RK. Data analysis and interpretation: JB, MF, PK. Manuscript writing: JB, MF, PK. All authors gave final approval of the published manuscript.

### Data Availability Statement:

The data that support the findings of this study are available from the corresponding author upon reasonable request.

### Conflicts of Interest:

The authors declare no potential conflicts of interest.

### Foundings:

This research did not receive any specific grant from funding agencies in the public, commercial, or not-for-profit sectors.

### Acknowledgements:

The authors would like to thank prof. Tadeusz Orłowski and prof. Maciej Krzakowski for their helpful comments that improved the research and manuscript.

### References

1. Siegel RL, Miller KD, Jemal A. Cancer Statistics. *CA Cancer J Clin.* 2017; 67: 7-30.
2. Travis WD, Brambilla E, Burke AP, et al. Introduction to The 2015 World Health Organization Classification of Tumors of the Lung, Pleura, Thymus, and Heart. *Thorac Oncol.* 2015; 10: 1240-1242.
3. Bray F, Ferlay J, Soerjomataram I, et al. Global Cancer Statistics 2018: GLOBOCAN estimates of incidence and mortality worldwide for 36 cancers in 185 countries. *CA Cancer J Clin.* 2018; 68: 394-424.
4. Houston KA, Henley SJ, Li J, et al. Patterns in lung cancer incidence rates and trends by histologic type in the United States, 2004–2009. *Lung Cancer.* 2014; 86: 22-28.
5. Vilmann P, Clementsen PF, Colella S, et al. Combined endobronchial and oesophageal endosonography for the diagnosis and staging of lung cancer. *European Society of*

- 1  
2  
3 Gastrointestinal Endoscopy (ESGE) Guideline, in cooperation with the European  
4 Respiratory Society (ERS) and the European Society of Thoracic Surgeons (ESTS). *Eur*  
5 *Respir J*. 2015; 46: 40-60.  
6  
7  
8  
9 6. Rivera MP, Wahidi MM, Mehta AC. Establishing the diagnosis of lung cancer: Diagnosis  
10 and management of lung cancer, 3rd ed: American College of Chest Physicians evidence-  
11 based clinical practice guidelines. *Chest*. 2013; 143: 142-165.  
12  
13 7. Micames CG, McCrory DC, Pavey DA, et al. Endoscopic ultrasound-guided fine-needle  
14 aspiration for non-small cell lung cancer staging: A systematic review and meta-analysis.  
15 *Chest*. 2007. 131: 539–548.  
16  
17 8. Sutedja TG, Codrington H, Risse EK, et al. Autofluorescence bronchoscopy improves  
18 staging of radiographically occult lung cancer and has an impact on therapeutic strategy.  
19 *Chest*. 2001. 120: 1327-1332.  
20  
21 9. Schmid-Bindert G, Wang Y, Jiang H, et al. EBUS-TBNA provides highest RNA yield for  
22 multiple biomarker testing from routinely obtained small biopsies in non-small cell lung  
23 cancer patients - a comparative study of three different minimal invasive sampling  
24 methods. *PLoS One*. 2013; 8: 77948.  
25  
26 10. Navani N, Brown JM, Nankivell M, et al. Suitability of EBUS-TBNA specimens for  
27 subtyping and genotyping of NSCLC: a multi-centre study of 774 patients. *Am J Respir*  
28 *Crit Care Med*. 2012; 185: 1316-1322.  
29  
30 11. Esterbrook G, Anathhanam S, Plant PK. Adequacy of endobronchial ultrasound  
31 transbronchial needle aspiration samples in the subtyping of non-small cell lung cancer.  
32 *Lung Cancer*. 2013; 80: 30–34.  
33  
34 12. Chin R Jr, Cappellari JO, McCain TW, et al. Increasing use of bronchoscopic needle  
35 aspiration to diagnose small cell lung cancer. *Mayo Clin Proc*. 2000; 75: 796-801.  
36  
37 13. Fernandez-Villar A, Botana M, Leiro V, et al. Validity and reliability of transbronchial  
38 needle aspiration for diagnosing mediastinal adenopathies. *BMC Pulm Med*. 2010; 10: 24.  
39  
40 14. Sharafkhaneh A, Baaklini W, Gorin AB, et al. Yield of transbronchial needle aspiration in  
41 diagnosis of mediastinal lesions. *Chest*. 2003; 124: 2131-2135.  
42  
43 15. Rivera MP, Mehta AC. American College of Chest Physicians. Initial diagnosis of lung  
44 cancer: ACCP evidence-based clinical practice guidelines (2nd edition). *Chest*. 2007; 132:  
45 131–148.  
46  
47 16. Rivera MP, Detterbeck F, Mehta AC. American College of Chest Physicians. Diagnosis of  
48 lung cancer: the guidelines. *Chest*. 2003; 123: 129–136.  
49  
50  
51  
52  
53  
54  
55  
56  
57  
58  
59  
60

- 1  
2  
3  
4  
5  
6  
7  
8  
9  
10  
11  
12  
13  
14  
15  
16  
17  
18  
19  
20  
21  
22  
23  
24  
25  
26  
27  
28  
29  
30  
31  
32  
33  
34  
35  
36  
37  
38  
39  
40  
41  
42  
43  
44  
45  
46  
47  
48  
49  
50  
51  
52
17. Pasko E, Serafin-Bromblik J, Piekorz W, et al. Combined endobronchial and endoscopic ultrasound-guided needle aspiration performed by single ultrasound bronchoscopes routine videobronchoscopy for diagnosis of advanced lung cancer – a prospective study. *Eur Respir J*. 2016; 48: 2034.
  18. Verma A, Jeon K, Koh WJ, et al. Endobronchial ultrasound-guided transbronchial needle aspiration for the diagnosis of central lung parenchymal lesions. *Yonsei Med J*. 2013; 54: 672–678.
  19. Tournoy KG, Rintoul RC, van Meerbeeck JP, et al. EBUS-TBNA for the diagnosis of central parenchymal lung lesions not visible at routine bronchoscopy. *Lung Cancer*. 2009; 63: 45-49.
  20. Zhao H, Xie Z, Zhou ZL, et al. Diagnostic value of endobronchial ultrasound-guided transbronchial needle aspiration in intrapulmonary lesions. *Chin Med J*. 2013; 126: 4312-4315.
  21. Oki M, Saka H, Ando M, et al. Endoscopic ultrasound-guided fine needle aspiration and endobronchial ultrasound-guided transbronchial needle aspiration: Are two better than one in mediastinal staging of non–small cell lung cancer? *J Thorac Cardiovasc Surg*. 2014; 148: 1169-1177.
  22. Wallace MB, Pascual JM, Raimondo M, et al. Minimally invasive endoscopic staging of suspected lung cancer. *JAMA*. 2008; 299: 540-546.
  23. Madan K, Mohan A, Ayub II, et al. Initial experience with endobronchial ultrasound-guided transbronchial needle aspiration (EBUS-TBNA) from a tuberculosis endemic population. *J Bronchol Interv Pulmonol*. 2014; 21: 208–214.
  24. Lange T, Kunzendorf F, Pfeifer M, et al. Endobronchial ultrasound-guided transbronchial needle aspiration in routine care-plenty of benign results and follow-up tests. *Int J Clin Pract*. 2012; 66: 438–445.
  25. Fournier C, Hermant C, Gounant V, et al. Diagnostic of mediastinal lymphadenopathy in extrathoracic cancer: a place for EBUS-TBNA in real life practice? *Respir Med Res*. 2019; 75: 1–4.

53  
54  
55  
56

Table 1. The effectiveness of bronchoscopy in the diagnosis of individual pathomorphological types of lung cancer depending on place of collecting the material and nodal station.

| Material | SCLC | Adenocarcinoma | Squamous cell carcinoma | NOS | Total lung cancer |
|----------|------|----------------|-------------------------|-----|-------------------|
|          |      |                |                         |     |                   |

|                                               |             |             |             |             |            |
|-----------------------------------------------|-------------|-------------|-------------|-------------|------------|
| EBUS-TBNA/EUS-FNA of lymph nodes              | 250 (27.7%) | 331 (36.7%) | 209 (23.1%) | 114 (12.5%) | 904 (100%) |
| EBUS-TBNA/EUS-FNA of tumor                    | 88 (24.7%)  | 94 (25.8%)  | 135 (37.2%) | 44 (12.3%)  | 361 (100%) |
| EBUS-TBNA/EUS-FNA metastases to adrenal gland | 3 (42.9%)   | 1 (14.3%)   | 2 (28.6%)   | 1 (14.3%)   | 7 (100%)   |
| Forceps biopsy of tumor                       | 156 (22%)   | 163 (25%)   | 270 (41.5%) | 62 (9.5%)   | 651 (100%) |

Figure 1. Results of pathomorphological examination carried out on material obtained from 5279 bronchoscopies (entire study population)

Figure 2. The incidence of individual pathomorphological types of LC in the entire study group of lung cancer patients

Figure 3. The incidence of individual pathomorphological types of LC according to the gender of patients with lung cancer

Figure 4. Percentage of patients with different types of lung cancer detected in materials collected with different bronchoscopic techniques. Frequency of different types of lung cancer was calculated in the whole group of patients undergoing a given bronchoscopic procedure (100%), which resulted in the diagnosis of lung cancer



1  
2  
3  
4  
5  
6  
7  
8  
9  
10  
11  
12  
13  
14  
15  
16  
17  
18  
19  
20  
21  
22  
23  
24  
25  
26  
27  
28  
29  
30  
31  
32  
33  
34  
35  
36  
37  
38  
39  
40  
41  
42  
43  
44  
45  
46  
47  
48  
49  
50  
51  
52  
53  
54  
55  
56  
57  
58  
59  
60

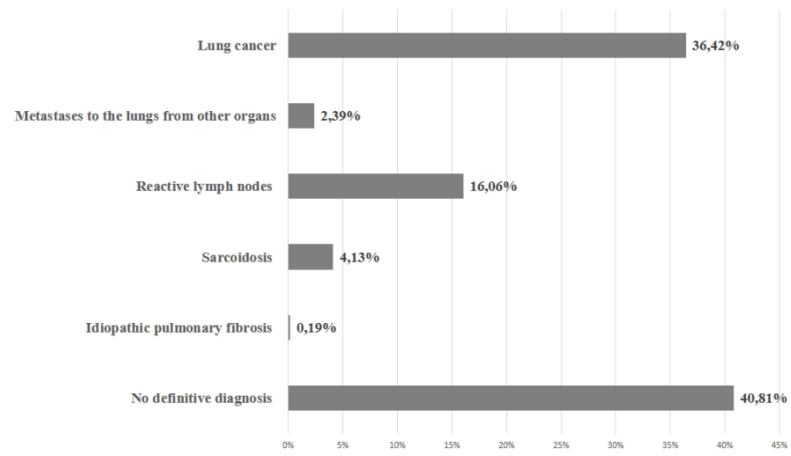

Figure 1. Results of pathomorphological examination carried out on material obtained from 5279 bronchoscopies (entire study population)

108x60mm (300 x 300 DPI)

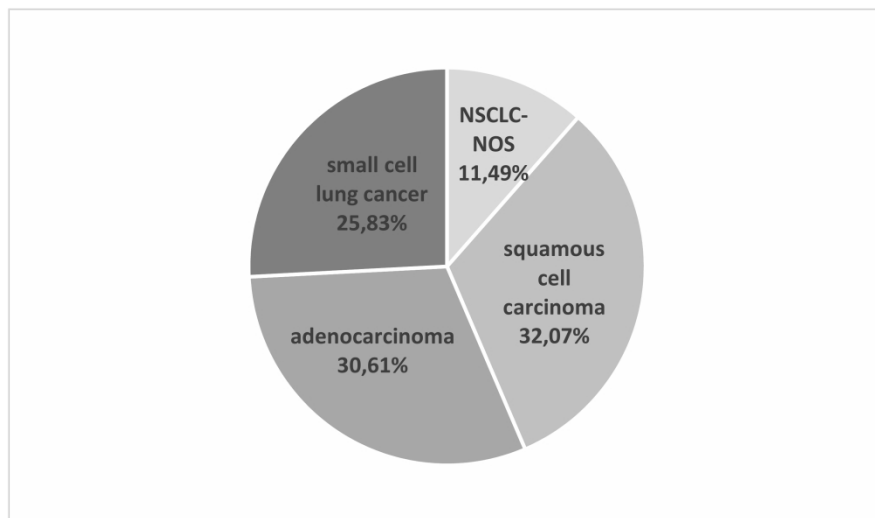

Figure 2. The incidence of individual pathomorphological types of LC in the entire study group of lung cancer patients

296x209mm (300 x 300 DPI)

1  
2  
3  
4  
5  
6  
7  
8  
9  
10  
11  
12  
13  
14  
15  
16  
17  
18  
19  
20  
21  
22  
23  
24  
25  
26  
27  
28  
29  
30  
31  
32  
33  
34  
35  
36  
37  
38  
39  
40  
41  
42  
43  
44  
45  
46  
47  
48  
49  
50  
51  
52  
53  
54  
55  
56  
57  
58  
59  
60

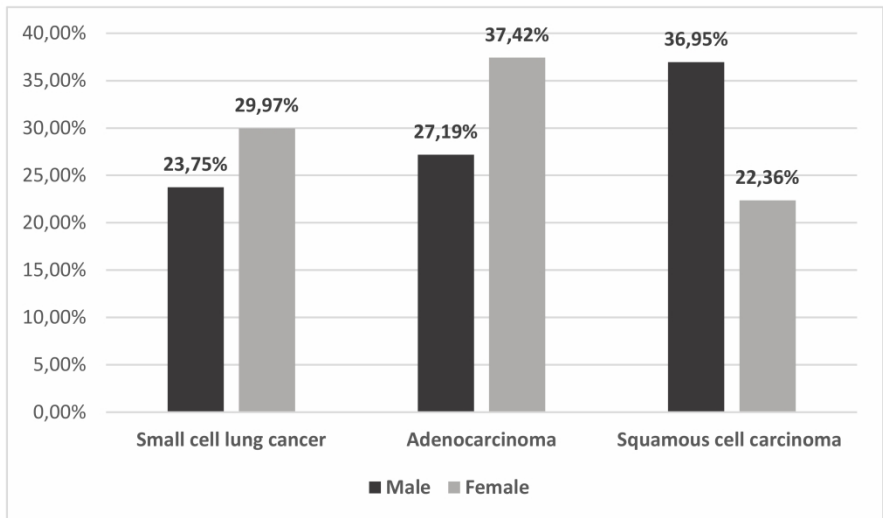

Figure 3. The incidence of individual pathomorphological types of LC according to the gender of patients with lung cancer

296x209mm (300 x 300 DPI)

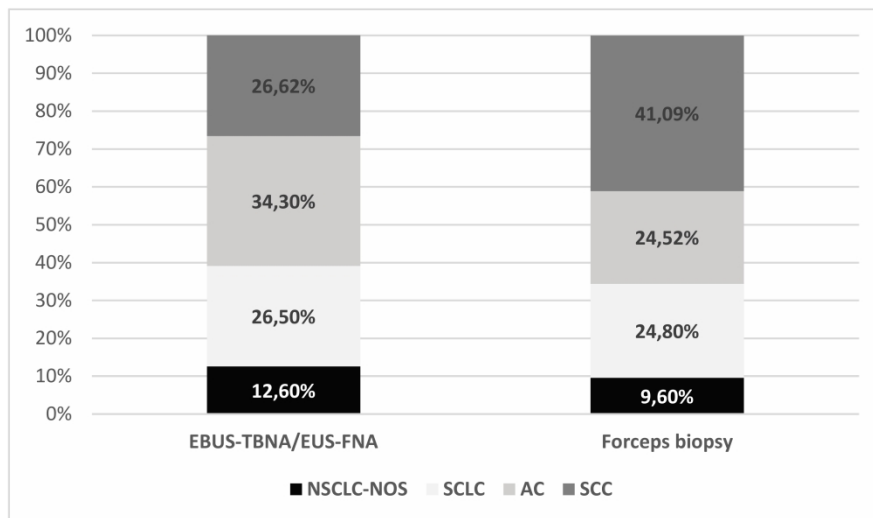

Figure 4. Percentage of patients with different types of lung cancer detected in materials collected with different bronchoscopic techniques. Frequency of different types of lung cancer was calculated in the whole group of patients undergoing a given bronchoscopic procedure (100%), which resulted in the diagnosis of lung cancer

296x209mm (300 x 300 DPI)

# BMJ Open

## The analysis of 5279 bronchoscopy results for the efficiency of various biopsy techniques in the diagnosis of lung cancer

|                                 |                                                                                                                                                                                                                                                                                                                                                                                                                                                                                                                                                                                                                                           |
|---------------------------------|-------------------------------------------------------------------------------------------------------------------------------------------------------------------------------------------------------------------------------------------------------------------------------------------------------------------------------------------------------------------------------------------------------------------------------------------------------------------------------------------------------------------------------------------------------------------------------------------------------------------------------------------|
| Journal:                        | <i>BMJ Open</i>                                                                                                                                                                                                                                                                                                                                                                                                                                                                                                                                                                                                                           |
| Manuscript ID                   | bmjopen-2020-043820.R1                                                                                                                                                                                                                                                                                                                                                                                                                                                                                                                                                                                                                    |
| Article Type:                   | Original research                                                                                                                                                                                                                                                                                                                                                                                                                                                                                                                                                                                                                         |
| Date Submitted by the Author:   | 28-Feb-2021                                                                                                                                                                                                                                                                                                                                                                                                                                                                                                                                                                                                                               |
| Complete List of Authors:       | Błach, Justyna; Medical University of Lublin,<br>Frąk, Małgorzata; Medical University of Lublin<br>Krawczyk, Pawel; Medical University of Lublin<br>Pankowski, Juliusz; Specialist Hospital for Lung Diseases "Rebirth" Klara Jelska<br>Pankowski, Adam; SilverSoft<br>Buczowski, Jarosław; Medical University of Lublin<br>Szlubowski, Artur; Specialist Hospital for Lung Diseases "Rebirth" Klara Jelska<br>Siwiec, Jan; Medical University of Lublin<br>Krudysz, Piotr; Izer-Med<br>Michnar, Marek; Medical University of Lublin<br>Kieszko, Robert; Medical University of Lublin<br>Milanowski, Janusz; Medical University of Lublin |
| <b>Primary Subject Heading</b>: | Respiratory medicine                                                                                                                                                                                                                                                                                                                                                                                                                                                                                                                                                                                                                      |
| Secondary Subject Heading:      | Oncology                                                                                                                                                                                                                                                                                                                                                                                                                                                                                                                                                                                                                                  |
| Keywords:                       | Bronchoscopy < THORACIC MEDICINE, Respiratory tract tumours < ONCOLOGY, RESPIRATORY MEDICINE (see Thoracic Medicine)                                                                                                                                                                                                                                                                                                                                                                                                                                                                                                                      |
|                                 |                                                                                                                                                                                                                                                                                                                                                                                                                                                                                                                                                                                                                                           |

SCHOLARONE™  
Manuscripts



I, the Submitting Author has the right to grant and does grant on behalf of all authors of the Work (as defined in the below author licence), an exclusive licence and/or a non-exclusive licence for contributions from authors who are: i) UK Crown employees; ii) where BMJ has agreed a CC-BY licence shall apply, and/or iii) in accordance with the terms applicable for US Federal Government officers or employees acting as part of their official duties; on a worldwide, perpetual, irrevocable, royalty-free basis to BMJ Publishing Group Ltd ("BMJ") its licensees and where the relevant Journal is co-owned by BMJ to the co-owners of the Journal, to publish the Work in this journal and any other BMJ products and to exploit all rights, as set out in our [licence](#).

The Submitting Author accepts and understands that any supply made under these terms is made by BMJ to the Submitting Author unless you are acting as an employee on behalf of your employer or a postgraduate student of an affiliated institution which is paying any applicable article publishing charge ("APC") for Open Access articles. Where the Submitting Author wishes to make the Work available on an Open Access basis (and intends to pay the relevant APC), the terms of reuse of such Open Access shall be governed by a Creative Commons licence – details of these licences and which [Creative Commons](#) licence will apply to this Work are set out in our licence referred to above.

Other than as permitted in any relevant BMJ Author's Self Archiving Policies, I confirm this Work has not been accepted for publication elsewhere, is not being considered for publication elsewhere and does not duplicate material already published. I confirm all authors consent to publication of this Work and authorise the granting of this licence.

1  
2  
3 **The analysis of 5279 bronchoscopy results for the efficiency of various biopsy techniques**  
4 **in the diagnosis of lung cancer**  
5  
6  
7

8 Justyna Błach<sup>1,2\*</sup>, Małgorzata Frąk<sup>1\*</sup>, Paweł Krawczyk<sup>1</sup>, Juliusz Pankowski<sup>3</sup>, Adam  
9 Pankowski<sup>4</sup>, Jarosław Buczkowski<sup>1,5</sup>, Artur Szlubowski<sup>3,6</sup>, Jan Siwiec<sup>1</sup>, Piotr Krudys<sup>6</sup>, Marek  
10 Michnar<sup>1</sup>, Robert Kieszko<sup>1</sup>, Janusz Milanowski<sup>1</sup>  
11  
12

13 \* authors equally contributing  
14  
15  
16

17 1. Department of Pneumonology, Oncology and Allergology, Medical University of Lublin,  
18 20-954 Lublin; Poland  
19

20 2. Department of Clinical Immunology, Medical University of Lublin, 20-954 Lublin; Poland  
21

22 3. Specialist Hospital for Lung Diseases "Rebirth" Klara Jelska, 34-500 Zakopane, Poland  
23

24 4. SilverSoft, Warszewska 64/1, 72-004 Pilchowo, Szczecin, Poland  
25

26 5. Department of Lung Diseases and Intensive Care, Independent Public Provincial John of  
27 God Hospital in Lublin, 20-400 Lublin, Poland  
28

29 6. Izerski Pulmonology and Chemotherapy Center "IZER-MED", 58-580 Szklarska Poręba,  
30 Poland  
31  
32

33  
34  
35  
36  
37  
38  
39 **Short title: The yield of bronchoscopy in the diagnosis of lung cancer**

40 **Corresponding author:**  
41

42 Justyna Błach MD  
43

44 Department of Pneumonology, Oncology and Allergology  
45

46 Medical University of Lublin, Poland  
47

48 Jaczewskiego 8, 20-954 Lublin, Poland  
49

50 tel. +48 81 724 42 93  
51

52 e-mail: [justynablach91@gmail.com](mailto:justynablach91@gmail.com)  
53  
54  
55  
56  
57  
58  
59  
60

## Abstract

### Introduction

Bronchoscopy is the main method in the diagnosis of various lung diseases. Endobronchial ultrasound transbronchial needle aspiration (EBUS-TBNA) is the most modern bronchoscopic technique useful in diagnosis and staging of lung cancer.

### Objectives

The aim of the study was to assess the yield of bronchoscopy in patients with suspected various respiratory diseases including lung cancer. In particular, we examined the efficiency of different biopsy techniques in the diagnosis of lung cancer in correlation with its localization and pathomorphological type.

### Patients and Methods

The results of pathomorphological examinations from 5279 bronchoscopies performed in 2016-2018 were analyzed. The material was collected with endobronchial ultrasound transbronchial needle aspiration (EBUS-TBNA), endoscopic ultrasound guided fine needle aspiration (EUS-FNA) and endobronchial forceps biopsy. Clinical and demographic factors were analyzed using the Fisher  $\chi^2$  test.

### Results

5279 patients were diagnosed due to various respiratory symptoms. Lung cancer was confirmed in 36.42% of patients. 40.81% of patients had no definitive pathomorphological diagnosis. Among patients with lung cancer, the most frequent diagnosis was non-small cell lung cancer: squamous cell lung cancer (SCC) - 32.07% and adenocarcinoma (AC) - 30.61%, then small cell lung cancer (SCLC) - 25.83% and not otherwise specified non-small cell lung cancer (NSCLC NOS) - 11.49%. Diagnosis of SCC was obtained significantly more often ( $\chi^2=43.143$ ,  $p<0.000001$ ) by endobronchial (41.09%) than by EBUS-TBNA/EUS-FNA (26.62%). On the contrary, diagnosis of AC or NSCLC NOS was significantly more often ( $\chi^2=20.394$ ,  $p<0.000007$  and  $\chi^2=3.902$ ,  $p<0.05$ , respectively) observed in EBUS-TBNA/EUS-FNA (34.31% and 12.6%) than in endobronchial biopsies (24.52% and 9.64%).

### Conclusions

The use of bronchoscopy in the diagnosis of various lung diseases is vital but also has many limitations. Effectiveness of EBUS-TBNA and endobronchial forceps biopsy in diagnosis of lung cancer is strongly affected by tumor localization and type of cancer.

**Key words:** lung cancer; bronchoscopy; endobronchial biopsy; EBUS-TBNA; EUS-FNA



## Article summary

### *Strengths and limitations of this study*

1. 5 279 patients were enrolled to the study group which makes it one of the largest studies in the world with assessment of bronchoscopy effectiveness in routine clinical practice.
2. We analyzed bronchoscopies underwent in 2016-2018 in a few Polish medical centers across the country in diversified population which ensure a high level of generalisability.
3. The study is an important contribution to the epidemiological data of advanced lung cancer in Poland.
4. Bronchoscopies were performed by 8 different bronchoscopists. This fact may cause human-dependent variation in results.
5. Results of pathomorphological assessment of the material obtained during single bronchoscopy was analyzed. Patients without diagnosed disease in the bronchoscopic material underwent further diagnostics using other methods or in other centers. Therefore, we were unable to report a definitive diagnosis in patients with inconclusive results of diagnostic procedures.

## Introduction

Epidemiological analyses indicate that lung cancer (LC) is the most common cause of cancer-related death. It is usually diagnosed in an unresectable, advanced stage. [1, 2] Lung cancer is the most common cancer in men and the third most common in women. In 2018, there were more than 2 million new cases of lung cancer worldwide. [3]

In the United States from 2004 to 2009, a total of 1,096,276 lung cancer cases were diagnosed and reported. This American study investigated the histologic type of lung cancer and demographic characteristics of the patients. The incidence of individual types of LC was as follows: small cell lung cancer (SCLC) – 14.9% of cases, squamous cell carcinoma (SCC) – 21.9% of cases, adenocarcinoma (AC) – 37.1% of cases and large cell carcinoma (LCC) – 3.2% of patients. [4]

It is difficult to obtain accurate epidemiological data on the occurrence of individual pathomorphological types of advanced LC in Poland. Up to date, no epidemiological studies have been conducted on a sufficiently large group of patients in advanced lung cancer to obtain reliable results. Statistics on pathomorphological diagnoses of lung cancer in material from bronchoscopy have not been conducted so far. In Poland, the main source of such data is the National Lung Cancer Registry which only contains details about patients undergoing surgery in earlier stages of the disease. Till today, there were 17 783 patients diagnosed and

operated in Polish thoracic surgery centers and registered in the National Lung Cancer Registry in the years 2014-2018. This group includes: 48.7% of patients with adenocarcinoma (AC), 40.8% of patients with squamous cell carcinoma (SCC), 6.45% of patients with large cell carcinoma (LCC), 2.1% of patients with adenosquamous cell carcinoma, 1.05% of patients with small cell lung cancer (SCLC) and 0.9% of patients with non-otherwise specified (NOS) non-small cell lung cancer (NSCLC). This material included a low percentage of patients with SCLC (usually an inoperable type of lung cancer) and patients with NSCLC-NOS (large surgical material is easier for pathomorphological examination which is a factor of reducing misdiagnosis). According to IASLC (International Association for the Study of Lung Cancer) recommendations, large cell carcinoma should be diagnosed only in the surgical materials extracted from the entire resected tumor. [5] Therefore, this type of cancer was recorded in surgical pathology in non-advanced NSCLC patients and almost absent in patients with advanced lung cancer diagnosed with tumor biopsy. [2]

Due to different locations of tumor types in the lungs or metastatic lymph nodes, varied approaches are required to cancer diagnosis. The peripheral location is characteristic for adenocarcinoma, while squamous and small cell carcinomas most often are located centrally. Bronchoscopy is an appropriate method for detecting LC and the endobronchial ultrasound-guided with transbronchial needle aspiration (EBUS-TBNA) procedure has an essential role in the investigation of lung cancer. If the tumor is centrally located and infiltrated the bronchus, the most optimal procedure seems to be the endobronchial biopsy using a brush or forceps. In contrast, adenocarcinoma frequently metastasizes to the mediastinal lymph nodes, which may be available on EBUS-TBNA or EUS-FNA procedures.

It is advisable to go along with the most easily available material, the collection of which will be associated with the lowest possible risk for the patient. In this connection, in everyday practice, the pathomorphological diagnosis is often achieved by metastatic lymph nodes. It is vital in diagnosing peripheral located tumors as adenocarcinoma.

Metastasis to the mediastinal lymph nodes is typical for each of types of lung cancer. We distinguish compartments of the mediastinal lymph nodes: superior mediastinal nodes (stations 2, 3 and 4), aortic nodes (stations 5 and 6), inferior mediastinal nodes (stations 7, 8, 9), hilar and interlobar lymph nodes (stations 10 and 11) and peripheral lymph nodes (station 12 for lobar nodes, station 13 for segmental nodes and station 14 for subsegmental nodes). EBUS-TBNA is most often used in diagnosis of superior mediastinal nodes, station 7 of inferior mediastinal nodes and stations 10, 11, 12 lymph nodes. EUS-FNA is preferred in diagnosis of superior mediastinal nodes and stations 7, 8 and 9 of inferior mediastinal nodes.

1  
2  
3 Moreover EUS-FNA is used to sampling subphrenic lymph nodes and metastases in liver and  
4 left adrenal gland. Both methods – EBUS-TBNA and EUS-FNA are preferred for mediastinal  
5 lymph nodes assessment for evaluation of N-stage in NSCLC patients. [6] These two methods  
6  
7 could be used in sampling visible tumors localized in central airways but also peripherally to  
8  
9 the main bronchi, i.e., in lobar or even segmental bronchi. These sampling principles were  
10  
11 also applied in our study in all the centers that participated in the study.  
12

13 Lung cancer staging is initially assessed in imaging studies. Normal mediastinum  
14 lymph nodes are defined below 10 mm in computed tomography (CT). Such a size of the  
15 lymph nodes suggests the advancement of clinical stage N0. Currently, sampling for N0 nodes  
16  
17 is not recommended, while surgery is the primary treatment method for stage N0/N1 lung  
18  
19 cancer. However, everyday practice shows that it is worth collecting non-enlarged nodes for  
20  
21 pathomorphological examination, because cancer cells are often found in such nodes. [7,8]  
22  
23

24  
25 The sensitivity of detecting lung cancer by different bronchoscopy methods varies  
26  
27 from 34% to 88% depending on the size and location of the tumor and preliminary diagnosis  
28  
29 of the patients. [9] Meta-analysis of 18 studies which included a total of 1,201 LC patients  
30  
31 was performed for assessment of sensitivity and specificity of ultrasound-guided fine needle  
32  
33 aspiration in mediastinal staging of lung cancer. Authors showed sensitivity of 83% (range  
34  
35 45-100%) and specificity of 97% (range 88-100%) of these methods. [10] In eight studies  
36  
37 limited to patients with enlarged mediastinal lymph nodes seen on CT, sensitivity was 90%  
38  
39 (95% CI: 84 to 94%) and specificity was 97% (95% CI: 95 to 98%). In patients without  
40  
41 enlarged mediastinal lymph nodes visible on CT, the overall sensitivity was 58% (95% CI:  
42  
43 39-75%). Therefore, the use of EBUS-TBNA increases the accuracy in the estimation of the  
44  
45 stage of lung cancer and may radically influence the further treatment of the patient and the  
46  
47 selection of the treatment method. Staging N2/N3 is a premise for the use of  
48  
49 radiochemotherapy and/or immunotherapy and allows the patient to be protected against the  
50  
51 burden of surgical procedure. EUS-FNA enables confirming the presence of distant  
52  
53 metastases, which has a decisive influence on therapeutic decisions. However, all false  
54  
55 negative results delay cancer diagnosis and force the repetition of diagnostic procedures  
56  
57 including surgery. Earlier detection of the lung cancer gives patients the chance for better  
58  
59 treatment. [11]  
60

## Aim

1  
2  
3 The objective of our study was to assess the yield of bronchoscopy in the diagnosis of  
4 lung cancer. Especially, we devoted special attention to the possibility of diagnosis of  
5 individual pathomorphological types of LC with various techniques use for collecting  
6 materials during bronchoscopy.  
7  
8  
9

## 10 11 **Material and methods**

12  
13 In our observational cross-sectional study, we analyzed the results of  
14 pathomorphological examination carried out on the material obtained by the 5279  
15 bronchoscopies performed in 2016-2018. Those bronchoscopies were performed in three  
16 Polish pulmonology departments. The study included 1892 women and 3387 men with  
17 median age of 65 years.  
18  
19  
20  
21

### 22 **Patient and Public Involvement**

23  
24 No patient involved. It was a retrospective study that relied fully on the documents gathered,  
25 thus eliminating the need for collaboration between patients and researchers.  
26

27  
28 Various diseases of the respiratory system were indication for bronchoscopy: 3127  
29 (59.2%) patients had suspicion of chest tumor in computed tomography, 882 (16.7%) patients  
30 demonstrated hilar lymphadenopathy, 205 (3.9%) patients had suspicion of sarcoidosis and 20  
31 (0.4%) patients had suspicion of pulmonary fibrosis. Other indications for bronchoscopy  
32 occurred in 1045 (19.8%) patients (e.g. suspicion of tuberculosis, chronic cough, hemoptysis,  
33 etc.). In patients with suspected cancer, samples of the tissue were taken through the  
34 bronchoscopy and technique was chosen in compliance with tumor or metastatic lymph  
35 node's location as it is described in the introduction. Forceps biopsies were performed using  
36 Olympus BF-1T180 and Pentax EB-1970K bronchoscopes, EBUS-TBNA – using Olympus  
37 BF-UC180F and Pentax EB-1970UK bronchoscopes (22-gauge needles), and EUS-FNA –  
38 using Olympus GF-UCT180 endoscope. Premedication for bronchoscopy was under local or  
39 general anesthesia, depending on the situation.  
40  
41  
42  
43  
44  
45  
46  
47

48  
49 Samples underwent pathomorphological examination which included hematoxylin-  
50 eosin (H&E) staining, mucicarmine staining and immunohistochemistry (IHC) examination  
51 such as staining of TTF-1 (thyroid transcription factor 1) and p63/p40. Samples diagnosed  
52 with non-squamous NSCLC were in-depth reported and underwent molecular testing for the  
53 presence of EGFR mutation by real-time PCR technique (RT-PCR), ALK gene rearrangement  
54 and PD-L1 expression by IHC. PD-L1 expression was also assessed in SCC patients. Large  
55 cell carcinoma (LCC) of the lung according to The 2015 World Health Organization (WHO)  
56 Classification of Tumors of the Lung, Pleura, Thymus and Heart cannot be diagnosed in small  
57  
58  
59  
60

specimens and aspiration biopsy materials. The diagnosis of LCC can only be made in the postoperative material. Therefore, there were no patients diagnosed with LCC in our study. Such patients were included in the group of patients diagnosed with NSCLC NOS. Chromogranin and synaptophysin was used in IHC examination of neuroendocrine tumors (small cell lung cancer or NSCLC NOS). All the centers participating in the study used these same procedures described above.

After receiving the diagnosis, we selected a population of patients with lung cancer and divided them to groups of patients with different cancer types (squamous cell lung cancer, adenocarcinoma, large cell carcinoma, not otherwise specified NSCLC, and small cell lung cancer). Then, we assessed the prevalence of different types of LC in the materials obtained with various bronchoscopic procedures.

Clinical and demographic factors were analyzed using the Pearson's Chi-square test. P-values below 0.05 were considered significant. The percentages reflect the relative number of all lung cancer patients diagnosed with a particular procedure. We only analyzed the results of the first-time bronchoscopy, that could be nondiagnostic. The evaluation of relative diagnostic yield (sensitivity) of different bronchoscopic procedures could not be done because, in our study, it was not possible to verify the final diagnosis of patient in the materials collected during the next bronchoscopy or another procedures (this applies mainly to patients with lung tumor or hilar lymphadenopathy). The following diagnostic procedures were carried out in various clinical centers throughout Poland. Therefore, we were unable to verify the diagnoses obtained later.

The protocol of the study was approved by the Committee of Ethics and Research at the Medical University of Lublin (KE-0254/5/2018).

## Results

In 3565 (67.5%) patients, EBUS-TBNA and transesophageal EUS-FNA was performed and cytological material archived in a cytoblock was obtained. In 1346 (25.5%) patients, EBUS-TBNA (without EUS-FNA) was the only diagnostic procedure. In the remaining patients, EBUS-TBNA was supplemented by EUS-FNA. There were no patients in whom EUS-FNA would be the only diagnostic method. 1714 (32.5%) patients had non-ultrasound-guided bronchoscopy with the forceps biopsy of endobronchial lesions allowing to obtain a small histological specimen.

Lung cancer was confirmed in group of 1923 (36.42%) patients, including 1280 men and 643 women. Only reactive lymph nodes were found in 16.06% of the patients, sarcoidosis

1  
2  
3 was diagnosed in 4.13% of the patients, idiopathic pulmonary fibrosis – in 0.19% of the  
4 patients, metastases to the lungs from other organs – in 2.39% of the patients. 40.81% of the  
5 patients had no definitive diagnosis (Figure 1). Lung cancer was confirmed in 51% of patients  
6 with suspected tumor in computed tomography. While, in the group of patients with hilar  
7 lymphadenopathy, lung cancer was diagnosed in only 10.1% of cases.  
8  
9

10  
11 Among patients with lung cancer, squamous cell carcinoma (32.07%) was most often  
12 diagnosed, then adenocarcinoma (30.61%), small cell lung cancer (25.83%) and NSCLC-  
13 NOS (11.49%) (Figure 2). SCLC and AC were significantly more frequent ( $\chi^2 = 8.649$ ,  $p =$   
14  $0.0033$  and  $\chi^2 = 21.128$ ,  $p < 0.000005$ , respectively) in women (29.97% and 37.42% of  
15 women with lung cancer) than in men (23.75% and 27.19% of male patients with lung  
16 cancer). Squamous cell carcinoma appeared significantly more often ( $\chi^2 = 41.881$ ,  $p <$   
17  $0.000001$ ) among male (36.95%) than among female (22.36%) patients with lung cancer  
18 (Figure 3). SCC was significantly more often ( $\chi^2 = 4.17$ ,  $p = 0.041$ ) diagnosed in the group of  
19 patients older than 65 years than in younger patients. Other pathomorphological types of lung  
20 cancer occurred with similar frequency in these two age groups.  
21  
22

23  
24 Endobronchial biopsies significantly more often ( $\chi^2 = 7.566$ ,  $p = 0.0059$ ) provided  
25 material for the diagnosis of lung cancer than the EBUS-TBNA and EUS-FNA procedures.  
26 42.35% of endobronchial biopsies and 33.6% of TBNA and FNA provided material sufficient  
27 to diagnose lung cancer. Fine needle biopsy of lymph nodes enabled the diagnosis of lung  
28 cancer in 29.2% of cases, fine needle biopsy of lung tumor – in 66.6% of cases, and forceps  
29 biopsy of bronchial mucosa lesions – in 48.2% of cases. These differences were statistically  
30 significant.  
31  
32

33  
34 Among patients with lung cancer, TBNA or FNA compared to endobronchial biopsies  
35 were similarly effective ( $\chi^2 = 0.656$ ,  $p = 0.418$ ) in detecting SCLC (26.5% vs. 24.8%). On the  
36 other hand, the diagnosis of AC and NSCLC-NOS was obtained significantly more frequently  
37 ( $\chi^2 = 20.394$ ,  $p = 0.000006$  and  $\chi^2 = 3.902$ ,  $p = 0.0482$ ) in EBUS-TBNA and EUS-FNA  
38 compared to endobronchial biopsies (34.3% vs. 24.52% and 12.6% vs. 9.6%, respectively).  
39 SCC was significantly more often ( $\chi^2 = 43.143$ ,  $p < 0.000001$ ) diagnosed in material obtained  
40 from forceps biopsy than in material from EBUS-TBNA and EUS-FNA (41.09% vs 26.62%)  
41 which was directly related to the more frequent central location and bronchial infiltration of  
42 this type of tumor. Computed tomography showed that in 79% of SCC patients the tumor was  
43 centrally located in the large bronchi. The analysis of bronchoscopic images showed that  
44 tumor deformed the bronchial mucosa or showed endobronchial growth in 67% of SCC  
45 patients. (Figure 4). Table 1 shows the effectiveness of bronchoscopy in the diagnosis of  
46  
47  
48  
49  
50  
51  
52  
53  
54  
55  
56  
57  
58  
59  
60

1  
2  
3 individual pathomorphological types of lung cancer depending on place of collecting the  
4 material.  
5  
6  
7

## 8 **Discussion**

9  
10 Our study on the yield of EBUS-TBNA and forceps biopsy in obtaining material for  
11 the diagnosis of various lung diseases is among the largest worldwide. The study points to  
12 numerous problems arising from the use of these techniques in routine clinical practice. We  
13 are aware of the many limitations of our study. First, we cannot determine the sensitivity and  
14 specificity of our methods, because it was not possible to determine the final diagnosis in this  
15 large group of patients (5 279 cases). In addition, we could not distinguish between material  
16 collected by EBUS-TBNA and EUS-FNA. Thirdly, diagnosis of large cell carcinoma was not  
17 possible in small specimens (LCC was probably qualified to the NSCLC-NOS group). A  
18 limitation of our study was also the lack of detailed clinical and radiological characteristics of  
19 all patients who underwent the bronchoscopy procedures.  
20  
21  
22  
23  
24  
25  
26

27 However, we found that advanced small cell lung cancer may be more common in  
28 Poland than previously thought. This tumor is characterized by rapid growth and metastases,  
29 therefore, more often it could be diagnosed in advanced stages using bronchoscopic  
30 techniques. EBUS-TBNA/EUS-FNA of lymph nodes and endobronchial biopsy had similar  
31 efficiency in SCLC detection. Furthermore, the difference in the percentage of patients with  
32 squamous cell carcinoma and adenocarcinoma diagnosed with endobronchial biopsies and  
33 TBNA or FNA is noteworthy. In our study, most patients with adenocarcinoma were  
34 diagnosed with EBUS-TBNA or EUS-FNA of lymph nodes, while patients with squamous  
35 cell carcinoma were diagnosed more often based on examination of material from  
36 endobronchial biopsy (forceps biopsy). Patients in cohort with squamous cell carcinoma were  
37 more likely to have endobronchial disease accessible by forceps. Therefore we could not  
38 ascertained that endobronchial biopsy is more effective for diagnosis of squamous cell lung  
39 cancer as there was no comparison to EBUS-TBNA and EUS-FNA for those patients. Thus,  
40 we point to the problem that effective bronchoscopic procedures depends on the location of  
41 the primary tumor and the presence of metastases in the lymph nodes.  
42  
43  
44  
45  
46  
47  
48  
49  
50  
51  
52

53 In addition to pathological diagnosis, molecular tests were also performed (*ALK* and  
54 *ROS1* gene rearrangement, *EGFR* mutation, PD-L1 expression), which are necessary for  
55 further qualification for treatment. These studies are made simultaneously from the same  
56 cytoblock. The method of sampling during bronchoscopy may affect the diagnostic value of  
57 the sample. Schmid-Bindert et al. performed prospective study in group of 106 patients with  
58  
59  
60

1  
2  
3 NSCLC diagnosis. Authors used bronchoscopy methods to provide highest RNA yield for  
4 multiple biomarker. They also compared diagnostic value of bronchoscopic samples in  
5 molecular tests. By the way, the authors showed how often they detected different  
6  
7 pathomorphological types of lung cancer using various bronchoscopic methods. Small  
8  
9 biopsies were collected by three different methods: forceps biopsy (44.6%), EBUS-TBNA  
10 (32.7%), and CT-guided core biopsy (22.8%). 38% of adenocarcinoma, 51% of squamous cell  
11 carcinoma and 11% of NSCLC NOS were diagnosed using forceps biopsy. EBUS-TBNA  
12 results were as follows: 45% of adenocarcinoma, 30% of squamous cell carcinoma and 24%  
13 of NSCLC-NOS. The study showed the sufficient effectiveness of all three methods in the  
14 diagnosis of lung cancer. However, it was indicated that the largest amount of genetic  
15 material was collected using EBUS-TBNA and this method showed the highest diagnostic  
16 value for molecular tests. [12]

17  
18  
19  
20  
21  
22  
23  
24 Many authors emphasize that the diagnosis of NSCLC NOS is the most common in  
25 the case of material obtained from EBUS-TBNA. Esterbrook et al. found that NSCLC-NOS  
26 rate was 20.8% in EBUS-TBNA samples. Similar results were received by Navani et al. In  
27 group of 774 patients with known or suspected lung cancer, 23% of patients had a final  
28 diagnosis of NSCLC NOS. [13, 14] Our study confirmed the high percentage of NSCLC NOS  
29 patients diagnosed with EBUS-TBNA procedures. Endobronchial biopsy was less likely to  
30 provide a diagnosis of NOS NSCLC.

31  
32  
33  
34  
35  
36 Chin et al. reported that EBUS-TBNA is the most sensitive diagnostic methods for  
37 SCLC, because it allows to sample of specimens from mediastinal as well as submucosal  
38 lesions. They also mentioned that the quality of specimens obtained by needle aspiration is  
39 better than by forceps biopsies, which may contain crush artifacts. [15] In addition, other  
40 studies noticed that the sensitivity of EBUS-TBNA for SCLC detection was higher than for  
41 NSCLC diagnosis. [16, 17] Our findings confirmed above statements. The majority of SCLC  
42 cases were diagnosed with EBUS-TBNA. Three SCLC patients were diagnosed from  
43 metastatic lesions in the adrenal gland using transesophageal EUS-FNA.

44  
45  
46  
47  
48  
49  
50 Many authors raise the problem that forceps biopsy has low sensitivity in the diagnosis  
51 of lung cancer. Forceps biopsy has a diagnostic yield ranging between 65-82%. In our  
52 preliminary study conducted in 212 patients with lung cancer suspicion, we compared  
53 sensitivity and accuracy of routine bronchoscopy with endobronchial biopsy, EBUS-TBNA,  
54 and combination of EBUS-TBNA and EUS-FNA techniques. Sensitivity and accuracy of  
55 endobronchial biopsy vs EBUS-TBNA vs combination of transbronchial biopsies were 43%  
56 vs 44.3% vs 93.7% and 93.8% vs 94.7% and 94.8%, respectively. This demonstrates high  
57  
58  
59  
60



1  
2  
3 usefulness of the combination of EBUS-TBNA and EUS-FNA in the diagnosis of lung cancer  
4 [18]. Verma et al. demonstrated sensitivity of EBUS-TBNA in cancer diagnosis of 91.4% in  
5 small group of 37 patients with lesions located adjacent to the trachea or lesions located  
6 adjacent to the main bronchi. [19] Tournoy et al. indicated that EBUS-TBNA has a sensitivity  
7 of 82% and low negative predictive value (23%). [20] The similar results received Zhao et al.  
8 for lesions located near the central airways. [21] Oki et al. showed that the combined  
9 endoscopic method with EBUS-TBNA and EUS-FNA with a single bronchoscope gives  
10 better results in staging of NSCLC than each technique alone. However, they mentioned that  
11 significant number of patients had false-negative EBUS-TBNA and EUS-FNA results.  
12 Moreover Oki et al. suggested that very important issue is bronchoscopists experience, which  
13 may cause differences in the results. [22] On the other hand, Wallace et al. showed a EBUS-  
14 TBNA sensitivity of only 69% in a group of 150 patients with lung cancer suspicion. [23]

15  
16  
17  
18  
19  
20  
21  
22  
23  
24  
25  
26  
27  
28  
29  
30  
31  
32  
33  
34  
35  
36  
37  
38  
39  
40  
41  
42  
43  
44  
45  
46  
47  
48  
49  
50  
51  
52  
53  
54  
55  
56  
57  
58  
59  
60  
Despite relatively low negative predictive value of EBUS-TBNA, there is an indication to perform other procedures (e.g., surgical procedures) for final diagnosis in a significant group of patients. In our study, 56.9% of patients who underwent bronchoscopy did not receive a definitive diagnosis of the diseases and they have been subjected to other diagnostic procedures or observations. We showed the results of all performed bronchoscopies and three different method of material collection (endobronchial biopsy and combination EBUS-TBNA and EUS-FNA). Moreover, unselected and heterogeneous patient population were recruited in three different hospitals that employ a total of 8 bronchoscopists. In most studies, the evaluation of the usefulness of EBUS-TBNA and EUS-FNA for detecting malignancy was conducted in selected patients with high clinical suspicion of the tumor. Small, preselected groups of patients with high risk of lung cancer could be the reason of the low negative predictive value of bronchoscopic procedures in these studies. Thus, these observations may not reflected the real clinical situation.

15  
16  
17  
18  
19  
20  
21  
22  
23  
24  
25  
26  
27  
28  
29  
30  
31  
32  
33  
34  
35  
36  
37  
38  
39  
40  
41  
42  
43  
44  
45  
46  
47  
48  
49  
50  
51  
52  
53  
54  
55  
56  
57  
58  
59  
60  
In studies where population was heterogenic regarding the disease (lung cancer, sarcoidosis, tuberculosis), EBUS-TBNA had diagnostic value only in 60-75% of patients. [24] Lange et al. showed diagnostic results of EBUS-TBNA in only 61.4% of unselected patients undergoing routine diagnostic procedures. [25] Fournier et al. examined 185 patients with extrathoracic malignancy and mediastinal lymphadenopathy in real life practice. Pathomorfological types of malignancy were successfully identified using EBUS-TBNA in only 93 patients (50.3%). The diagnostic sensitivity, specificity, negative predictive value, and positive predictive value were 68.4%, 100%, 53.3%, and 100%, respectively. [26] Murthi et al conducted research compare the accuracy of EBUS-TBNA to surgery in diagnosing hilar

1  
2  
3 and mediastinal pathologies. EBUS-TBNA for all pathologies had an accuracy of 81.2% and  
4 sensitivity of 55.1%. [27]  
5  
6  
7

## 8 **Conclusions**

9  
10 Comparing all these data we could conclude that bronchoscopy is vital but not an ideal  
11 technique in the routine diagnosis of respiratory diseases. Our study showed that 41%  
12 bronchoscopy material was insufficient to perform reliable pathomorphological examination.  
13 This mainly concerned patients with suspected lung tumor or lymphadenopathy. Especially,  
14 here is a problem in the diagnosis of advanced lung tumors (mainly adenocarcinomas) if only  
15 one procedure was performed during bronchoscopy. It is advisable to use several different  
16 techniques of collecting specimens from both the tumor and the mediastinal lymph nodes  
17 during bronchoscopy. The use of brush biopsy, forceps biopsy, bronchoaspirate analysis  
18 EBUS-TBNA and EUS-FNA simultaneously or if desired was of the highest diagnostic value.  
19 However, sometimes this fails and bronchoscopy must be repeated, or thoracic procedures  
20 (e.g. mediastinoscopy or thoracoscopy) must be performed. We found that the EBUS-TBNA  
21 value in daily clinical practice differed from that in clinical trials. Therefore, precise  
22 estimation of the frequency of individual pathomorphological types of lung cancer based on  
23 material obtained bronchoscopically is not possible. However, EBUS-TBNA play an essential  
24 role in staging of invasive lung cancer. Therefore, its value in the diagnosis of lung cancer is  
25 not limited to demonstrating the presence of cancer and its type, but above all to determining  
26 the extent of the disease and qualification for appropriate treatment. It seems that the  
27 incidence of lung cancer with a typical peripheral localization (adenocarcinoma) may be  
28 underestimated in comparison to the incidence of lung cancer with a typical central  
29 localization (squamous cell carcinoma, SCLC).  
30  
31  
32  
33  
34  
35  
36  
37  
38  
39  
40  
41  
42  
43  
44  
45

### 46 **Authorship contribution statement:**

47  
48 Conception and design of the study: JB, MF, PK, JP. Administrative support: PK, JP, AP, JB,  
49 AS, JS, MM, PK, RK, JM. Provision of study material or patients: JP, AP, JB, AS, JS, MM,  
50 PK, RK, JM. Collection and assembly of data: JB, MF, PK, JP, AP, JB, AS, JS, MM, PK, RK.  
51 Data analysis and interpretation: JB, MF, PK. Manuscript writing: JB, MF, PK. All authors  
52 gave final approval of the published manuscript.  
53  
54  
55  
56  
57

### 58 **Data Availability Statement:**

1  
2  
3 The data that support the findings of this study are available from the corresponding author  
4 upon reasonable request.  
5  
6  
7

#### 8 Conflicts of Interest:

9  
10 The authors declare no potential conflicts of interest.  
11  
12

#### 13 Foundings:

14  
15 This research did not receive any specific grant from funding agencies in the public,  
16 commercial, or not-for-profit sectors.  
17  
18  
19

#### 20 Acknowledgements:

21  
22 The authors would like to thank prof. Tadeusz Orłowski and prof. Maciej Krzakowski for  
23 theirs helpful comments that improved the research and manuscript.  
24  
25  
26

#### 27 References

- 28  
29 1. Siegel RL, Miller KD, Jemal A. Cancer Statistics. *CA Cancer J Clin.* 2017; 67: 7-30.
- 30  
31 2. Travis WD, Brambilla E, Burke AP, et al. Introduction to the 2015 World Health  
32 Organization Classification of Tumors of the Lung, Pleura, Thymus, and Heart. *Thorac*  
33 *Oncol.* 2015; 10: 1240-1242.
- 34  
35 3. Bray F, Ferlay J, Soerjomataram I, et al. Global Cancer Statistics 2018: GLOBOCAN  
36 estimates of incidence and mortality worldwide for 36 cancers in 185 countries. *CA*  
37 *Cancer J Clin.* 2018; 68: 394-424.
- 38  
39 4. Houston KA, Henley SJ, Li J, et al. Patterns in lung cancer incidence rates and trends by  
40 histologic type in the United States, 2004-2009. *Lung Cancer.* 2014; 86: 22-28.
- 41  
42 5. Zugazagoitia J, Enguita AB, Nuñez JA, Iglesias L, Ponce S. The new IASLC/ATS/ERS  
43 lung adenocarcinoma classification from a clinical perspective: current concepts and  
44 future prospects. *J Thorac Dis.* 2014;6(Suppl 5): S526-S536
- 45  
46 6. Vilmann P, Clementsen PF, Colella S, et al. Combined endobronchial and oesophageal  
47 endosonography for the diagnosis and staging of lung cancer. European Society of  
48 Gastrointestinal Endoscopy (ESGE) Guideline, in cooperation with the European  
49 Respiratory Society (ERS) and the European Society of Thoracic Surgeons (ESTS). *Eur*  
50 *Respir J.* 2015; 46: 40-60.
- 51  
52 7. Gomez-Caro A, Garcia S, Reguart N, Arguis P, Sanchez M et al. Incidence of occult  
53 mediastinal node involvement in cN0 non-small-cell lung cancer patients after negative  
54  
55  
56  
57  
58  
59  
60

- uptake of positron emission tomography/computer tomography scan. *Eur J Cardiothorac Surg.* 2010; 37: 1168-1174.
8. Watanabe S, Asamura H, Suzuki K, Tsuchiya R. Problems in diagnosis and surgical management of clinical N1 non-small cell lung cancer. *Ann Thorac Surg.* 2005; 79: 1682-1685
  9. Rivera MP, Wahidi MM, Mehta AC. Establishing the diagnosis of lung cancer: Diagnosis and management of lung cancer, 3rd ed: American College of Chest Physicians evidence-based clinical practice guidelines. *Chest.* 2013; 143: 142-165.
  10. Micames CG, McCrory DC, Pavey DA, et al. Endoscopic ultrasound-guided fine-needle aspiration for non-small cell lung cancer staging: A systematic review and meta-analysis. *Chest.* 2007. 131: 539–548.
  11. Sutedja TG, Codrington H, Risse EK, et al. Autofluorescence bronchoscopy improves staging of radiographically occult lung cancer and has an impact on therapeutic strategy. *Chest.* 2001. 120: 1327-1332.
  12. Schmid-Bindert G, Wang Y, Jiang H, et al. EBUS-TBNA provides highest RNA yield for multiple biomarker testing from routinely obtained small biopsies in non-small cell lung cancer patients - a comparative study of three different minimal invasive sampling methods. *PLoS One.* 2013; 8: 77948.
  13. Navani N, Brown JM, Nankivell M, et al. Suitability of EBUS-TBNA specimens for subtyping and genotyping of NSCLC: a multi-centre study of 774 patients. *Am J Respir Crit Care Med.* 2012; 185: 1316-1322.
  14. Esterbrook G, Ananthhanam S, Plant PK. Adequacy of endobronchial ultrasound transbronchial needle aspiration samples in the subtyping of non-small cell lung cancer. *Lung Cancer.* 2013; 80: 30-34.
  15. Chin R Jr, Cappellari JO, McCain TW, et al. Increasing use of bronchoscopic needle aspiration to diagnose small cell lung cancer. *Mayo Clin Proc.* 2000; 75: 796-801.
  16. Fernandez-Villar A, Botana M, Leiro V, et al. Validity and reliability of transbronchial needle aspiration for diagnosing mediastinal adenopathies. *BMC Pulm Med.* 2010; 10: 24.
  17. Sharafkhaneh A, Baaklini W, Gorin AB, et al. Yield of transbronchial needle aspiration in diagnosis of mediastinal lesions. *Chest.* 2003; 124: 2131-2135.
  18. Pasko E, Serafin-Bromblik J, Piekorz W, et al. Combined endobronchial and endoscopic ultrasound-guided needle aspiration performed by single ultrasound bronchoscopes routine videobronchoscopy for diagnosis of advanced lung cancer – a prospective study. *Eur Respir J.* 2016; 48: 2034.

19. Verma A, Jeon K, Koh WJ, et al. Endobronchial ultrasound-guided transbronchial needle aspiration for the diagnosis of central lung parenchymal lesions. *Yonsei Med J.* 2013; 54: 672-678.
20. Tournoy KG, Rintoul RC, van Meerbeeck JP, et al. EBUS-TBNA for the diagnosis of central parenchymal lung lesions not visible at routine bronchoscopy. *Lung Cancer.* 2009; 63: 45-49.
21. Zhao H, Xie Z, Zhou ZL, et al. Diagnostic value of endobronchial ultrasound-guided transbronchial needle aspiration in intrapulmonary lesions. *Chin Med J.* 2013; 126: 4312-4315.
22. Oki M, Saka H, Ando M, et al. Endoscopic ultrasound-guided fine needle aspiration and endobronchial ultrasound-guided transbronchial needle aspiration: Are two better than one in mediastinal staging of non-small cell lung cancer? *J Thorac Cardiovasc Surg.* 2014; 148: 1169-1177.
23. Wallace MB, Pascual JM, Raimondo M, et al. Minimally invasive endoscopic staging of suspected lung cancer. *JAMA.* 2008; 299: 540-546.
24. Madan K, Mohan A, Ayub II, et al. Initial experience with endobronchial ultrasound-guided transbronchial needle aspiration (EBUS-TBNA) from a tuberculosis endemic population. *J Bronchol Interv Pulmonol.* 2014; 21: 208-214.
25. Lange T, Kunzendorf F, Pfeifer M, et al. Endobronchial ultrasound-guided transbronchial needle aspiration in routine care-plenty of benign results and follow-up tests. *Int J Clin Pract.* 2012; 66: 438-445.
26. Fournier C, Hermant C, Gounant V, et al. Diagnostic of mediastinal lymphadenopathy in extrathoracic cancer: a place for EBUS-TBNA in real life practice? *Respir Med Res.* 2019; 75: 1-4.
27. Murthi M, Donna E, Arias S, et al. Diagnostic Accuracy of Endobronchial Ultrasound-Guided Transbronchial Needle Aspiration (EBUS-TBNA) in Real Life. *Front Med (Lausanne).* 2020; 7:118.

Table 1. The effectiveness of varies techniques during bronchoscopy in the diagnosis of individual pathomorphological types of lung cancer depending on place of collecting the material and nodal station.

| Material | SCLC | Adenocarcinoma | Squamous cell | NOS | Total lung |
|----------|------|----------------|---------------|-----|------------|
|          |      |                |               |     |            |

|                                               |                |             | <b>carcinoma</b> |                | <b>cancer</b> |
|-----------------------------------------------|----------------|-------------|------------------|----------------|---------------|
| EBUS-TBNA/EUS-FNA of lymph nodes              | 250<br>(27.7%) | 331 (36.7%) | 209 (23.1%)      | 114<br>(12.5%) | 904 (100%)    |
| EBUS-TBNA/EUS-FNA of tumor                    | 88<br>(24.7%)  | 94 (25.8%)  | 135 (37.2%)      | 44<br>(12.3%)  | 361 (100%)    |
| EBUS-TBNA/EUS-FNA metastases to adrenal gland | 3 (42.9%)      | 1 (14.3%)   | 2 (28.6%)        | 1<br>(14.3%)   | 7 (100%)      |
| Forceps biopsy of tumor                       | 156 (22%)      | 163 (25%)   | 270 (41.5%)      | 62<br>(9.5%)   | 651 (100%)    |

Figure 1. Results of pathomorphological examination carried out on material obtained from 5279 bronchoscopies (entire study population)

Figure 2. The incidence of individual pathomorphological types of LC in the entire study group of lung cancer patients

Figure 3. The incidence of individual pathomorphological types of LC according to the gender of patients with lung cancer

1  
2  
3 Figure 4. Percentage of patients with different types of lung cancer detected in materials  
4 collected with different bronchoscopic techniques. Frequency of different types of lung cancer  
5 was calculated in the whole group of patients undergoing a given bronchoscopic procedure  
6 (100%), which resulted in the diagnosis of lung cancer  
7  
8  
9  
10  
11  
12  
13  
14  
15  
16  
17  
18  
19  
20  
21  
22  
23  
24  
25  
26  
27  
28  
29  
30  
31  
32  
33  
34  
35  
36  
37  
38  
39  
40  
41  
42  
43  
44  
45  
46  
47  
48  
49  
50  
51  
52  
53  
54  
55  
56  
57  
58  
59  
60

For peer review only

1  
2  
3  
4  
5  
6  
7  
8  
9  
10  
11  
12  
13  
14  
15  
16  
17  
18  
19  
20  
21  
22  
23  
24  
25  
26  
27  
28  
29  
30  
31  
32  
33  
34  
35  
36  
37  
38  
39  
40  
41  
42  
43  
44  
45  
46  
47  
48  
49  
50  
51  
52  
53  
54  
55  
56  
57  
58  
59  
60



Figure 1. Results of pathomorphological examination carried out on material obtained from 5279 bronchoscopies (entire study population)

108x60mm (300 x 300 DPI)





Figure 2. The incidence of individual pathomorphological types of LC in the entire study group of lung cancer patients

296x209mm (300 x 300 DPI)

1  
2  
3  
4  
5  
6  
7  
8  
9  
10  
11  
12  
13  
14  
15  
16  
17  
18  
19  
20  
21  
22  
23  
24  
25  
26  
27  
28  
29  
30  
31  
32  
33  
34  
35  
36  
37  
38  
39  
40  
41  
42  
43  
44  
45  
46  
47  
48  
49  
50  
51  
52  
53  
54  
55  
56  
57  
58  
59  
60

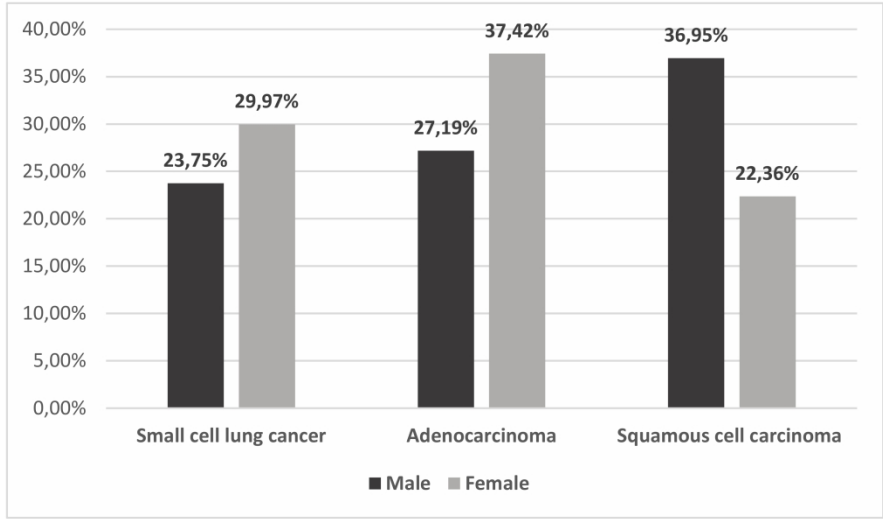

Figure 3. The incidence of individual pathomorphological types of LC according to the gender of patients with lung cancer

296x209mm (300 x 300 DPI)



Figure 4. Percentage of patients with different types of lung cancer detected in materials collected with different bronchoscopic techniques. Frequency of different types of lung cancer was calculated in the whole group of patients undergoing a given bronchoscopic procedure (100%), which resulted in the diagnosis of lung cancer

296x209mm (300 x 300 DPI)

STROBE Statement—Checklist of items that should be included in reports of *cohort studies*

|                              | Item No | Recommendation                                                                                                                                                                                    | Page No |
|------------------------------|---------|---------------------------------------------------------------------------------------------------------------------------------------------------------------------------------------------------|---------|
| <b>Title and abstract</b>    | 1       | (a) Indicate the study's design with a commonly used term in the title or the abstract                                                                                                            | 2       |
|                              |         | (b) Provide in the abstract an informative and balanced summary of what was done and what was found                                                                                               | 2       |
| <b>Introduction</b>          |         |                                                                                                                                                                                                   |         |
| Background/rationale         | 2       | Explain the scientific background and rationale for the investigation being reported                                                                                                              | 4-5     |
| Objectives                   | 3       | State specific objectives, including any prespecified hypotheses                                                                                                                                  | 6       |
| <b>Methods</b>               |         |                                                                                                                                                                                                   |         |
| Study design                 | 4       | Present key elements of study design early in the paper                                                                                                                                           | 6-7     |
| Setting                      | 5       | Describe the setting, locations, and relevant dates, including periods of recruitment, exposure, follow-up, and data collection                                                                   | 6-7     |
| Participants                 | 6       | (a) Give the eligibility criteria, and the sources and methods of selection of participants. Describe methods of follow-up                                                                        | 6-7     |
|                              |         | (b) For matched studies, give matching criteria and number of exposed and unexposed                                                                                                               | 6-7     |
| Variables                    | 7       | Clearly define all outcomes, exposures, predictors, potential confounders, and effect modifiers. Give diagnostic criteria, if applicable                                                          | 6-7     |
| Data sources/<br>measurement | 8*      | For each variable of interest, give sources of data and details of methods of assessment (measurement). Describe comparability of assessment methods if there is more than one group              | 6-7     |
| Bias                         | 9       | Describe any efforts to address potential sources of bias                                                                                                                                         | 6-7     |
| Study size                   | 10      | Explain how the study size was arrived at                                                                                                                                                         | 6-7     |
| Quantitative variables       | 11      | Explain how quantitative variables were handled in the analyses. If applicable, describe which groupings were chosen and why                                                                      | 6-7     |
| Statistical methods          | 12      | (a) Describe all statistical methods, including those used to control for confounding                                                                                                             | 6-7     |
|                              |         | (b) Describe any methods used to examine subgroups and interactions                                                                                                                               |         |
|                              |         | (c) Explain how missing data were addressed                                                                                                                                                       |         |
|                              |         | (d) If applicable, explain how loss to follow-up was addressed                                                                                                                                    |         |
|                              |         | (e) Describe any sensitivity analyses                                                                                                                                                             |         |
| <b>Results</b>               |         |                                                                                                                                                                                                   |         |
| Participants                 | 13*     | (a) Report numbers of individuals at each stage of study—eg numbers potentially eligible, examined for eligibility, confirmed eligible, included in the study, completing follow-up, and analysed | 8       |
|                              |         | (b) Give reasons for non-participation at each stage                                                                                                                                              |         |
|                              |         | (c) Consider use of a flow diagram                                                                                                                                                                |         |
| Descriptive data             | 14*     | (a) Give characteristics of study participants (eg demographic, clinical, social) and information on exposures and potential confounders                                                          | 8       |
|                              |         | (b) Indicate number of participants with missing data for each variable of interest                                                                                                               |         |
|                              |         | (c) Summarise follow-up time (eg, average and total amount)                                                                                                                                       |         |
| Outcome data                 | 15*     | Report numbers of outcome events or summary measures over time                                                                                                                                    | 8       |

|    |                          |    |                                                                                                                                                                                                              |       |
|----|--------------------------|----|--------------------------------------------------------------------------------------------------------------------------------------------------------------------------------------------------------------|-------|
| 1  | Main results             | 16 | (a) Give unadjusted estimates and, if applicable, confounder-adjusted estimates and their precision (eg, 95% confidence interval). Make clear which confounders were adjusted for and why they were included | 8     |
| 2  |                          |    | (b) Report category boundaries when continuous variables were categorized                                                                                                                                    |       |
| 3  |                          |    | (c) If relevant, consider translating estimates of relative risk into absolute risk for a meaningful time period                                                                                             |       |
| 4  |                          |    |                                                                                                                                                                                                              |       |
| 5  |                          |    |                                                                                                                                                                                                              |       |
| 6  |                          |    |                                                                                                                                                                                                              |       |
| 7  |                          |    |                                                                                                                                                                                                              |       |
| 8  |                          |    |                                                                                                                                                                                                              |       |
| 9  | Other analyses           | 17 | Report other analyses done—eg analyses of subgroups and interactions, and sensitivity analyses                                                                                                               | -     |
| 10 |                          |    |                                                                                                                                                                                                              |       |
| 11 | <b>Discussion</b>        |    |                                                                                                                                                                                                              |       |
| 12 |                          |    |                                                                                                                                                                                                              |       |
| 13 | Key results              | 18 | Summarise key results with reference to study objectives                                                                                                                                                     | 9     |
| 14 | Limitations              | 19 | Discuss limitations of the study, taking into account sources of potential bias or imprecision. Discuss both direction and magnitude of any potential bias                                                   | 9     |
| 15 |                          |    |                                                                                                                                                                                                              |       |
| 16 | Interpretation           | 20 | Give a cautious overall interpretation of results considering objectives, limitations, multiplicity of analyses, results from similar studies, and other relevant evidence                                   | 10-11 |
| 17 |                          |    |                                                                                                                                                                                                              |       |
| 18 |                          |    |                                                                                                                                                                                                              |       |
| 19 | Generalisability         | 21 | Discuss the generalisability (external validity) of the study results                                                                                                                                        | 12    |
| 20 |                          |    |                                                                                                                                                                                                              |       |
| 21 | <b>Other information</b> |    |                                                                                                                                                                                                              |       |
| 22 | Funding                  | 22 | Give the source of funding and the role of the funders for the present study and, if applicable, for the original study on which the present article is based                                                | 13    |
| 23 |                          |    |                                                                                                                                                                                                              |       |
| 24 |                          |    |                                                                                                                                                                                                              |       |

\*Give information separately for exposed and unexposed groups.

**Note:** An Explanation and Elaboration article discusses each checklist item and gives methodological background and published examples of transparent reporting. The STROBE checklist is best used in conjunction with this article (freely available on the Web sites of PLoS Medicine at <http://www.plosmedicine.org/>, Annals of Internal Medicine at <http://www.annals.org/>, and Epidemiology at <http://www.epidem.com/>). Information on the STROBE Initiative is available at <http://www.strobe-statement.org>.

# BMJ Open

## Observational cross-sectional study of 5279 bronchoscopy results for the practical effectiveness of various biopsy techniques in the diagnosis of lung diseases with particular emphasis on lung cancer

|                                 |                                                                                                                                                                                                                                                                                                                                                                                                                                                                                                                                                                                                                                       |
|---------------------------------|---------------------------------------------------------------------------------------------------------------------------------------------------------------------------------------------------------------------------------------------------------------------------------------------------------------------------------------------------------------------------------------------------------------------------------------------------------------------------------------------------------------------------------------------------------------------------------------------------------------------------------------|
| Journal:                        | <i>BMJ Open</i>                                                                                                                                                                                                                                                                                                                                                                                                                                                                                                                                                                                                                       |
| Manuscript ID                   | bmjopen-2020-043820.R2                                                                                                                                                                                                                                                                                                                                                                                                                                                                                                                                                                                                                |
| Article Type:                   | Original research                                                                                                                                                                                                                                                                                                                                                                                                                                                                                                                                                                                                                     |
| Date Submitted by the Author:   | 17-May-2021                                                                                                                                                                                                                                                                                                                                                                                                                                                                                                                                                                                                                           |
| Complete List of Authors:       | Błach, Justyna; Medical University of Lublin, Frąk, Małgorzata; Medical University of Lublin<br>Krawczyk, Pawel; Medical University of Lublin<br>Pankowski, Juliusz; Specialist Hospital for Lung Diseases "Rebirth" Klara Jelska<br>Pankowski, Adam; SilverSoft<br>Buczowski, Jarosław; Medical University of Lublin<br>Szlubowski, Artur; Specialist Hospital for Lung Diseases "Rebirth" Klara Jelska<br>Siwiec, Jan; Medical University of Lublin<br>Krudyś, Piotr; Izer-Med<br>Michnar, Marek; Medical University of Lublin<br>Kieszko, Robert; Medical University of Lublin<br>Milanowski, Janusz; Medical University of Lublin |
| <b>Primary Subject Heading</b>: | Respiratory medicine                                                                                                                                                                                                                                                                                                                                                                                                                                                                                                                                                                                                                  |
| Secondary Subject Heading:      | Oncology                                                                                                                                                                                                                                                                                                                                                                                                                                                                                                                                                                                                                              |
| Keywords:                       | Bronchoscopy < THORACIC MEDICINE, Respiratory tract tumours < ONCOLOGY, RESPIRATORY MEDICINE (see Thoracic Medicine)                                                                                                                                                                                                                                                                                                                                                                                                                                                                                                                  |
|                                 |                                                                                                                                                                                                                                                                                                                                                                                                                                                                                                                                                                                                                                       |

SCHOLARONE™  
Manuscripts



I, the Submitting Author has the right to grant and does grant on behalf of all authors of the Work (as defined in the below author licence), an exclusive licence and/or a non-exclusive licence for contributions from authors who are: i) UK Crown employees; ii) where BMJ has agreed a CC-BY licence shall apply, and/or iii) in accordance with the terms applicable for US Federal Government officers or employees acting as part of their official duties; on a worldwide, perpetual, irrevocable, royalty-free basis to BMJ Publishing Group Ltd ("BMJ") its licensees and where the relevant Journal is co-owned by BMJ to the co-owners of the Journal, to publish the Work in this journal and any other BMJ products and to exploit all rights, as set out in our [licence](#).

The Submitting Author accepts and understands that any supply made under these terms is made by BMJ to the Submitting Author unless you are acting as an employee on behalf of your employer or a postgraduate student of an affiliated institution which is paying any applicable article publishing charge ("APC") for Open Access articles. Where the Submitting Author wishes to make the Work available on an Open Access basis (and intends to pay the relevant APC), the terms of reuse of such Open Access shall be governed by a Creative Commons licence – details of these licences and which [Creative Commons](#) licence will apply to this Work are set out in our licence referred to above.

Other than as permitted in any relevant BMJ Author's Self Archiving Policies, I confirm this Work has not been accepted for publication elsewhere, is not being considered for publication elsewhere and does not duplicate material already published. I confirm all authors consent to publication of this Work and authorise the granting of this licence.

1  
2  
3 **Observational cross-sectional study of 5279 bronchoscopy results for the practical**  
4 **effectiveness of various biopsy techniques in the diagnosis of lung diseases with**  
5 **particular emphasis on lung cancer**  
6  
7  
8  
9

10 Justyna Błach<sup>1,2\*</sup>, Małgorzata Frąk<sup>1\*</sup>, Paweł Krawczyk<sup>1</sup>, Juliusz Pankowski<sup>3</sup>, Adam  
11 Pankowski<sup>4</sup>, Jarosław Buczkowski<sup>1,5</sup>, Artur Szlubowski<sup>3,6</sup>, Jan Siwiec<sup>1</sup>, Piotr Krudys<sup>6</sup>, Marek  
12 Michnar<sup>1</sup>, Robert Kieszko<sup>1</sup>, Janusz Milanowski<sup>1</sup>  
13  
14

15 \* authors equally contributing  
16  
17

18  
19  
20 1. Department of Pneumonology, Oncology and Allergology, Medical University of Lublin,  
21 20-954 Lublin; Poland  
22

23 2. Department of Clinical Immunology, Medical University of Lublin, 20-954 Lublin; Poland  
24

25 3. Specialist Hospital for Lung Diseases "Rebirth" Klara Jelska, 34-500 Zakopane, Poland  
26

27 4. SilverSoft, Warszewska 64/1, 72-004 Pilchowo, Szczecin, Poland  
28

29 5. Department of Lung Diseases and Intensive Care, Independent Public Provincial John of  
30 God Hospital in Lublin, 20-400 Lublin, Poland  
31

32 6. Izerski Pulmonology and Chemotherapy Center "IZER-MED", 58-580 Szklarska Poręba,  
33 Poland  
34  
35

36  
37  
38  
39  
40  
41 Short title: **The yield of bronchoscopy in the diagnosis of lung cancer**

42 **Corresponding author:**  
43

44 Justyna Błach MD  
45

46 Department of Pneumonology, Oncology and Allergology  
47

48 Medical University of Lublin, Poland  
49

50 Jaczewskiego 8, 20-954 Lublin, Poland  
51

52 tel. +48 81 724 42 93  
53

54 e-mail: [justynablach91@gmail.com](mailto:justynablach91@gmail.com)  
55  
56  
57  
58  
59  
60



## Abstract

### Introduction

Bronchoscopy is the main method in the diagnosis of various lung diseases. Endobronchial ultrasound transbronchial needle aspiration (EBUS-TBNA) is the most modern bronchoscopic technique useful in diagnosis and staging of lung cancer.

### Objectives

The aim of the study was to assess the yield of bronchoscopy in patients with suspected various respiratory diseases including lung cancer. In particular, we examined the efficiency of different biopsy techniques in the diagnosis of lung cancer in correlation with its localization and pathomorphological type.

### Patients and Methods

The results of pathomorphological examinations from 5279 bronchoscopies performed in 2016-2018 were analyzed. The material was collected with endobronchial ultrasound transbronchial needle aspiration (EBUS-TBNA), endoscopic ultrasound guided fine needle aspiration (EUS-FNA) and endobronchial forceps biopsy. Clinical and demographic factors were analyzed using the Fisher  $\chi^2$  test.

### Results

5279 patients were diagnosed due to various respiratory symptoms. Lung cancer was confirmed in 36.42% of patients. 40.81% of patients had no definitive pathomorphological diagnosis. Among patients with lung cancer, the most frequent diagnosis was non-small cell lung cancer: squamous cell lung cancer (SCC) - 32.07% and adenocarcinoma (AC) - 30.61%, then small cell lung cancer (SCLC) - 25.83% and not otherwise specified non-small cell lung cancer (NSCLC NOS) - 11.49%. Diagnosis of SCC was obtained significantly more often ( $\chi^2=43.143$ ,  $p<0.000001$ ) by forceps biopsy (41.09%) than by EBUS-TBNA/EUS-FNA (26.62%). On the contrary, diagnosis of AC or NSCLC NOS was significantly more often ( $\chi^2=20.394$ ,  $p<0.000007$  and  $\chi^2=3.902$ ,  $p<0.05$ , respectively) observed in EBUS-TBNA/EUS-FNA (34.31% and 12.6%) than in endobronchial biopsies (24.52% and 9.64%).

### Conclusions

The use of bronchoscopy in the diagnosis of various lung diseases is vital but also has many limitations. Effectiveness of EBUS-TBNA and endobronchial forceps biopsy in diagnosis of lung cancer is strongly affected by tumor localization and type of cancer.

**Key words:** lung cancer; bronchoscopy; endobronchial biopsy; EBUS-TBNA; EUS-FNA

## Article summary

### *Strengths and limitations of this study*

1. 5 279 patients were enrolled to the study group which makes it one of the largest studies in the world with assessment of bronchoscopy effectiveness in routine clinical practice.
2. We analyzed bronchoscopies performed in 2016-2018 in a few polish medical centers across the country, in a diversified population which ensures a high level of generalisability.
3. The study is an important contribution to the epidemiological data of advanced lung cancer in Poland.
4. Bronchoscopies were performed by 8 different bronchoscopists. This fact may cause human-dependent variation in results.
5. Results of pathomorphological assessment of the material obtained during single bronchoscopy was analyzed. Patients without diagnosed disease in the bronchoscopic material underwent further diagnostics using other methods or in other centers. Therefore, we were unable to report a definitive diagnosis in patients with inconclusive results of diagnostic procedures.

## Introduction

Epidemiological analyses indicate that lung cancer (LC) is the most common cause of cancer-related deaths. It is usually diagnosed in an unresectable, advanced stage. [1, 2] Lung cancer is the most common cancer in men and the third most common in women. In 2018, there were more than 2 million new cases of lung cancer worldwide. [3]

In the United States from 2004 to 2009, a total of 1,096,276 lung cancer cases were diagnosed and reported. This American study investigated the histologic type of lung cancer and demographic characteristics of the patients. The incidence of individual types of LC was as follows: small cell lung cancer (SCLC) – 14.9%, squamous cell carcinoma (SCC) – 21.9%, adenocarcinoma (AC) – 37.1% and large cell carcinoma (LCC) – 3.2% of cases. [4]

It is difficult to obtain accurate epidemiological data on the occurrence of individual pathomorphological types of advanced LC in Poland. Up to date, no epidemiological studies have been conducted on a sufficiently large group of patients with advanced lung cancer to obtain reliable results. Statistics on pathomorphological diagnoses of lung cancer in material from bronchoscopy have not been conducted so far. In Poland, the main source of such data is the National Lung Cancer Registry which only contains details about patients undergoing surgery in earlier stages of the disease. There were 17,783 patients diagnosed and operated in Polish thoracic surgery centers and registered in the National Lung Cancer Registry in the years

1  
2  
3 2014-2018. This group includes: 48.7% of patients with AC, 40.8% of patients with SCC,  
4 6.45% of patients with LCC, 2.1% of patients with adenosquamous cell carcinoma, 1.05% of  
5 patients with SCLC and 0.9% of patients with non-otherwise specified (NOS) non-small cell  
6 lung cancer (NSCLC). This material included low percentage of patients with SCLC (usually  
7 an inoperable type of lung cancer) and patients with NSCLC-NOS (large surgical material is  
8 easier for pathomorphological examination which is a factor of reducing misdiagnosis).  
9 According to IASLC (International Association for the Study of Lung Cancer)  
10 recommendations, large cell carcinoma should be diagnosed only in surgical materials extracted  
11 from the entire resected tumor. [5] Therefore, this type of cancer was recorded in surgical  
12 pathology in non-advanced NSCLC patients and almost absent in patients with advanced lung  
13 cancer diagnosed with tumor biopsy. [2]

14  
15  
16  
17  
18  
19  
20  
21  
22 Due to different locations of tumor types in the lungs or metastatic lymph nodes, varied  
23 approaches are required to cancer diagnosis. The peripheral location is characteristic for AC,  
24 while squamous and small cell carcinomas most often are located centrally. Bronchoscopy is  
25 an appropriate method for detecting LC and the endobronchial ultrasound-guided with  
26 transbronchial needle aspiration (EBUS-TBNA) procedure has an essential role in the  
27 investigation of lung cancer. If the tumor is centrally located and infiltrated the bronchus, the  
28 most optimal procedure seems to be the endobronchial biopsy using a brush or forceps. In  
29 contrast, adenocarcinoma frequently metastasizes to the mediastinal lymph nodes, which may  
30 be available on EBUS-TBNA or EUS-FNA procedures.

31  
32  
33  
34  
35  
36  
37  
38  
39  
40  
41  
42  
43  
44  
45  
46  
47  
48  
49  
50  
51  
52  
53  
54  
55  
56  
57  
58  
59  
60  
Metastasis to mediastinal lymph nodes is typical for each of types of lung cancer. We  
distinguish compartments of the mediastinal lymph nodes: superior mediastinal nodes (stations  
2, 3 and 4), aortic nodes (stations 5 and 6), inferior mediastinal nodes (stations 7, 8, 9), hilar  
and interlobar lymph nodes (stations 10 and 11) and peripheral lymph nodes (station 12 for  
lobar nodes, station 13 for segmental nodes and station 14 for subsegmental nodes). EBUS-  
TBNA is most often used in diagnosis of superior mediastinal nodes, station 7 of inferior  
mediastinal nodes and stations 10, 11, 12 lymph nodes. EUS-FNA is preferred in diagnosis of  
superior mediastinal nodes and stations 7, 8 and 9 of inferior mediastinal nodes. Moreover EUS-  
FNA is used for sampling subphrenic lymph nodes and metastases in liver and left adrenal  
gland. Both methods – EBUS-TBNA and EUS-FNA are preferred for mediastinal lymph nodes  
assessment for evaluation of N-stage in NSCLC patients. [6] These two methods could be used  
in sampling visible tumors localized in central airways but also peripherally to the main bronchi,  
i.e. in lobar or even segmental bronchi.

1  
2  
3 Lung cancer staging is initially assessed through imaging studies. Normal mediastinum  
4 lymph nodes are defined below 10 mm in computed tomography (CT). Such a size of these  
5 lymph nodes suggests the N0 clinical stage. Currently, sampling for N0 nodes is not  
6 recommended, while surgery is the primary treatment method for N0/N1 stage of lung cancer.  
7 However, everyday practice shows that it is worth collecting non-enlarged nodes for  
8 pathomorphological examination, because cancer cells are often found in such nodes. [7,8]  
9

10  
11  
12 The sensitivity of detecting lung cancer using different bronchoscopy methods varies  
13 from 34% to 88% depending on the size and location of the tumor and preliminary diagnosis of  
14 the patients. [9] Meta-analysis of 18 studies which included a total of 1,201 LC patients was  
15 performed for assessment of sensitivity and specificity of ultrasound-guided fine needle  
16 aspiration in mediastinal staging of lung cancer. Authors showed sensitivity of 83% (range 45-  
17 100%) and specificity of 97% (range 88-100%) of these methods. [10] In eight studies limited  
18 to patients with enlarged mediastinal lymph nodes seen on CT, sensitivity was 90% (95% CI:  
19 84 to 94%) and specificity was 97% (95% CI: 95 to 98%). In patients without enlarged  
20 mediastinal lymph nodes visible on CT, the overall sensitivity was 58% (95% CI: 39-75%).  
21 Therefore, the use of EBUS-TBNA increases the accuracy in the estimation of the stage of lung  
22 cancer and may radically influence the further treatment of the patient and the selection of the  
23 treatment methods. EUS-FNA enables confirming the presence of distant metastases, which has  
24 a decisive impact on therapeutic decisions. However, all false negative results delay cancer  
25 diagnosis and force the repetition of diagnostic procedures including surgery. Earlier detection  
26 of lung cancer gives patients the chance for better treatment. [11]  
27  
28  
29  
30  
31  
32  
33  
34  
35  
36  
37  
38  
39  
40

## 41 **Aim**

42  
43  
44 The objective of our study was a descriptive analysis of lung diseases diagnoses,  
45 especially lung cancer, established by various bronchoscopic procedures. We devoted special  
46 attention to the possibility of diagnosis of individual pathomorphological types of LC with  
47 various techniques used for collecting materials during bronchoscopy.  
48  
49  
50  
51  
52  
53  
54

## 55 **Material and methods**

56  
57 In our observational cross-sectional study, we analyzed the results of  
58 pathomorphological examination carried out on the material obtained during 5279  
59 bronchoscopies performed in 2016-2018. Those bronchoscopies were performed in three Polish  
60

1  
2  
3 pulmonology departments. The study included 1892 women and 3387 men, with median age  
4 of 65 years.

5  
6 The study was retrospective and relied fully on the analysis of documents gathered, thus  
7 eliminating the need for collaboration between patients and researchers. No patients were  
8 enrolled specifically to carry out this study.

9  
10  
11 Various diseases of the respiratory system were indication for bronchoscopy: 3127  
12 (59.2%) patients had suspicion of chest tumor in computed tomography, 882 (16.7%) patients  
13 demonstrated hilar lymphadenopathy, 205 (3.9%) patients had suspicion of sarcoidosis and 20  
14 (0.4%) patients had suspicion of pulmonary fibrosis. Other indications for bronchoscopy  
15 occurred in 1045 (19.8%) patients (e.g. suspicion of tuberculosis, chronic cough, hemoptysis,  
16 etc.). In patients with suspected cancer, samples of the tissue were acquired through  
17 bronchoscopy and the technique was chosen in compliance with tumor or metastatic lymph  
18 node's location as it is described in the introduction. Forceps biopsies were performed using  
19 Olympus BF-1T180 and Pentax EB-1970K bronchoscopes, EBUS-TBNA – using Olympus  
20 BF-UC180F and Pentax EB-1970UK bronchoscopes (22-gauge needles), and EUS-FNA –  
21 using Olympus GF-UCT180 endoscope. Premedication for bronchoscopy was under local or  
22 general anesthesia, depending on the situation.

23  
24  
25 Samples underwent pathomorphological examination which included hematoxylin-  
26 eosin (H&E) staining, mucicarmine staining and immunohistochemistry (IHC) examination,  
27 such as staining of TTF-1 (thyroid transcription factor 1) and p63/p40. Samples diagnosed with  
28 non-squamous NSCLC were in-depth reported and underwent molecular testing for the  
29 presence of *EGFR* gene mutation by real-time PCR technique (RT-PCR), *ALK* gene  
30 rearrangement and PD-L1 expression by IHC. PD-L1 expression was also assessed in SCC  
31 patients. Large cell carcinoma (LCC) of the lung according to the 2015 World Health  
32 Organization (WHO) Classification of Tumors of the Lung, Pleura, Thymus and Heart cannot  
33 be diagnosed in small specimens and aspiration biopsy materials. The diagnosis of LCC can  
34 only be made in the postoperative material. Therefore, there were no patients diagnosed with  
35 LCC in our study. Such patients were included in the group of patients diagnosed with NSCLC  
36 NOS. Chromogranin and synaptophysin was used in IHC examination of neuroendocrine  
37 tumors (small cell lung cancer or NSCLC NOS). All the centers participating in the study used  
38 these same procedures described above.

39  
40  
41 After receiving the diagnosis, we selected a population of patients with lung cancer and  
42 divided them into groups of patients with different cancer types detectable with bronchoscopic  
43 procedure (squamous cell lung cancer, adenocarcinoma, large cell carcinoma, not otherwise  
44  
45  
46  
47  
48  
49  
50  
51  
52  
53  
54  
55  
56  
57  
58  
59  
60

1  
2  
3 specified NSCLC, and small cell lung cancer). Then, we assessed the prevalence of different  
4 types of LC in the materials obtained with various bronchoscopic procedures.  
5

6 Clinical and demographic factors were analyzed using the Pearson's Chi-square test. P-  
7 values below 0.05 were considered significant. The percentages reflect the relative number of  
8 all lung cancer patients diagnosed with a particular procedure. We only analyzed the results of  
9 the first-time bronchoscopy, that could be nondiagnostic. The evaluation of relative diagnostic  
10 yield (sensitivity) of different bronchoscopic procedures could not be done because, in our  
11 study, it was not possible to verify the final diagnosis of patients in the materials collected  
12 during the next bronchoscopy or another procedures (this applies mainly to patients with lung  
13 tumor or hilar lymphadenopathy). The following diagnostic procedures were carried out in  
14 various clinical centers throughout Poland. Therefore, we were unable to verify the diagnoses  
15 obtained later.  
16  
17  
18  
19  
20  
21  
22  
23

24 The protocol of the study was approved by the Committee of Ethics and Research at the  
25 Medical University of Lublin (KE-0254/5/2018).  
26  
27  
28

## 29 Results

30 In 3565 (67.5%) patients, EBUS-TBNA and transesophageal EUS-FNA was performed  
31 and cytological material was archived in a cellblock. In 1346 (25.5%) patients, EBUS-TBNA  
32 (without EUS-FNA) was the only diagnostic procedure. In the remaining patients, EBUS-  
33 TBNA was supplemented by EUS-FNA. There were no patients in whom EUS-FNA would be  
34 the only diagnostic method. 1714 (32.5%) patients had non-ultrasound-guided bronchoscopy  
35 with the forceps biopsy of endobronchial lesions allowing to obtain a small histological  
36 specimen.  
37  
38  
39  
40  
41  
42

43 Lung cancer was confirmed in a group of 1923 (36.42%) patients, including 1280 men  
44 and 643 women. Reactive lymph nodes were found in 16.06% of the patients, sarcoidosis was  
45 diagnosed in 4.13%, idiopathic pulmonary fibrosis – in 0.19%, metastases to the lungs from  
46 other organs – in 2.39% of the patients. 40.81% of the patients had no definitive diagnosis  
47 (Figure 1). Lung cancer was confirmed in 51% of patients with suspected tumor in computed  
48 tomography. While, in the group of patients with hilar lymphadenopathy, lung cancer was  
49 diagnosed in only 10.1% of cases.  
50  
51  
52  
53

54 Among those with lung cancer, squamous cell carcinoma (32.07%) was most often  
55 diagnosed, then adenocarcinoma (30.61%), small cell lung cancer (25.83%) and NSCLC-NOS  
56 (11.49%) (Figure 2). SCLC and AC were significantly more frequent ( $\chi^2 = 8.649$ ,  $p = 0.0033$   
57 and  $\chi^2 = 21.128$ ,  $p < 0.000005$ , respectively) in women (29.97% and 37.42% of women with  
58  
59  
60

lung cancer) than in men (23.75% and 27.19% of male patients with lung cancer). Squamous cell carcinoma appeared significantly more often ( $\chi^2 = 41.881$ ,  $p < 0.000001$ ) among male (36.95%) than among female (22.36%) patients with lung cancer (Figure 3). SCC was significantly more often ( $\chi^2 = 4.17$ ,  $p = 0.041$ ) diagnosed in the group of patients older than 65 years than in younger patients. Other pathomorphological types of lung cancer occurred with similar frequency in these two age groups.

Endobronchial biopsies significantly more often ( $\chi^2 = 7.566$ ,  $p = 0.0059$ ) provided material for the diagnosis of lung cancer than the EBUS-TBNA and EUS-FNA procedures. 42.35% of endobronchial biopsies and 33.6% of TBNA and FNA provided material sufficient to diagnose lung cancer. Fine needle biopsy of lymph nodes enabled the diagnosis of lung cancer in 29.2% of cases, fine needle biopsy of lung tumor – in 66.6% of cases, and forceps biopsy of bronchial mucosa lesions – in 48.2% of cases. These differences were statistically significant.

Among patients with lung cancer, TBNA or FNA compared to endobronchial biopsies gave a similar result ( $\chi^2 = 0.656$ ,  $p = 0.418$ ) in detection of SCLC (26.5% vs. 24.8%). On the other hand, the diagnosis of AC and NSCLC-NOS was obtained significantly more frequently ( $\chi^2 = 20.394$ ,  $p = 0.000006$  and  $\chi^2 = 3.902$ ,  $p = 0.0482$ ) in EBUS-TBNA and EUS-FNA compared to endobronchial biopsies (34.3% vs. 24.52% and 12.6% vs. 9.6%, respectively). SCC, among other lung cancer types detected by bronchoscopy, was diagnosed in 41.77% in materials obtained by forceps biopsy and only in 26.62% in materials with EBUS-TBNA or EUS-FNA ( $\chi^2 = 43.143$ ,  $p < 0.000001$ ), which was directly related to the more frequent central location and bronchial infiltration of this type of tumor. Computed tomography showed that in 79% of SCC patients the tumor was centrally located in the large bronchi. The analysis of bronchoscopic images showed that tumor deformed the bronchial mucosa or showed endobronchial growth in 67% of SCC patients. (Figure 4). Table 1 shows the results of bronchoscopy procedures in the diagnosis of individual pathomorphological types of lung cancer depending on place of collecting the material.

## Discussion

Our study on the results of EBUS-TBNA/EUS-FNA and forceps biopsy in obtaining materials for the diagnosis of various lung diseases is among the largest worldwide. The study points to numerous problems arising from the use of these techniques in routine clinical practice. We are aware of the many limitations of our study. First, we cannot determine the sensitivity and specificity of our methods, because it was not possible to determine the final

1  
2  
3 diagnosis in such a large group of patients (5 279 cases). In addition, we could not distinguish  
4 between material collected by EBUS-TBNA and EUS-FNA. We do not know how many lung  
5 cancer patients were diagnosed only in the material from EBUS-TBNA or only in the material  
6 from EUS-FNA, or in both types of these materials. We also do not know the number of biopsies  
7 performed during one bronchoscopy. This data is missing from the results of the  
8 pathomorphological examination that we analyzed. Thirdly, diagnosis of large cell carcinoma  
9 was not possible in small specimens (LCC was probably qualified to the NSCLC-NOS group).  
10 A limitation of our study was also the lack of detailed clinical and radiological characteristics  
11 of all patients who underwent bronchoscopy procedures.  
12

13  
14  
15 However, we found that advanced small cell lung cancer may be more common in  
16 Poland than previously thought. This tumor is characterized by rapid growth and metastases,  
17 therefore, more often it could be diagnosed in advanced stages using bronchoscopic techniques.  
18 SCLC diagnosis in EBUS-TBNA/EUS-FNA of lymph nodes and endobronchial biopsy occurs  
19 at the same frequency. Furthermore, the difference in the percentage of patients with squamous  
20 cell carcinoma and adenocarcinoma diagnosed with endobronchial biopsies and TBNA or FNA  
21 is noteworthy. In our study, most patients with adenocarcinoma were diagnosed with EBUS-  
22 TBNA or EUS-FNA of lymph nodes, while patients with squamous cell carcinoma were  
23 diagnosed more often based on examination of material from endobronchial biopsy (forceps  
24 biopsy). Patients in cohort with squamous cell carcinoma were more likely to have  
25 endobronchial disease accessible by forceps. Therefore we could not ascertain that  
26 endobronchial biopsy is more effective for diagnosis of squamous cell lung cancer as there was  
27 no comparison to EBUS-TBNA and EUS-FNA for those patients. Thus, we point to the problem  
28 that results of bronchoscopic procedures depends on the location of the primary tumor and the  
29 presence of metastases in the lymph nodes.  
30

31  
32 Schmid-Bindert et al. showed how often they detected different pathomorphological  
33 types of lung cancer using various bronchoscopic methods. Small biopsies were collected by  
34 three different methods: forceps biopsy (44.6%), EBUS-TBNA (32.7%), and CT-guided core  
35 biopsy (22.8%). 38% of adenocarcinoma, 51% of squamous cell carcinoma and 11% of NSCLC  
36 NOS were diagnosed using forceps biopsy. EBUS-TBNA results were as follows: 45% of  
37 adenocarcinoma, 30% of squamous cell carcinoma and 24% of NSCLC NOS. [12]  
38

39  
40 Many authors emphasize that the diagnosis of NSCLC NOS is the most common in the  
41 case of material obtained from EBUS-TBNA. Esterbrook et al. found that NSCLC-NOS rate  
42 was 20.8% in EBUS-TBNA samples. Similar results were achieved by Navani et al. In group  
43 of 774 patients with known or suspected lung cancer, 23% of patients had a final diagnosis of  
44  
45  
46  
47  
48  
49  
50  
51  
52  
53  
54  
55  
56  
57  
58  
59  
60



1  
2  
3 NSCLC NOS. [13, 14] Our study confirmed the high percentage of NSCLC NOS patients  
4 diagnosed with EBUS-TBNA procedures. Endobronchial biopsy was less likely to provide a  
5 diagnosis of NSCLC NOS.  
6  
7

8 Chin et al. reported that EBUS-TBNA is the most sensitive diagnostic method for SCLC  
9 detection, because it allows to sample specimens from mediastinal as well as submucosal  
10 lesions. They also mentioned that the quality of specimens obtained by needle aspiration is  
11 better than by forceps biopsies, which may contain crushed artifacts. [15] In addition, other  
12 studies noticed that the sensitivity of EBUS-TBNA for SCLC detection was higher than for  
13 NSCLC diagnosis. [16, 17] Our findings confirmed the above statements. The majority of  
14 SCLC cases were diagnosed with EBUS-TBNA. Three SCLC patients were diagnosed from  
15 metastatic lesions in the adrenal gland using transesophageal EUS-FNA.  
16  
17

18 Many authors raise the problem that forceps biopsy has low sensitivity in the diagnosis  
19 of lung cancer. Forceps biopsy has a diagnostic yield ranging between 65-82%. In preliminary  
20 study by Pasko et al. conducted in 212 patients with lung cancer suspicion, authors compared  
21 sensitivity and accuracy of routine bronchoscopy techniques: endobronchial biopsy, EBUS-  
22 TBNA, and combination of EBUS-TBNA and EUS-FNA. Sensitivity and accuracy of  
23 endobronchial biopsy vs EBUS-TBNA vs combination of transbronchial biopsies were 43% vs  
24 44.3% vs 93.7% and 93.8% vs 94.7% and 94.8%, respectively. This demonstrates high  
25 usefulness of the combination of EBUS-TBNA and EUS-FNA in the diagnosis of lung cancer  
26 [18]. Verma et al. demonstrated sensitivity of EBUS-TBNA in cancer diagnosis of 91.4% in  
27 small group of 37 patients with lesions located adjacent to the trachea or lesions located adjacent  
28 to the main bronchi. [19] Tournoy et al. indicated that EBUS-TBNA has a sensitivity of 82%  
29 and low negative predictive value (23%). [20] The similar results were received by Zhao et al.  
30 for lesions located near the central airways. [21] Oki et al. showed that the combined endoscopic  
31 method with EBUS-TBNA and EUS-FNA with a single bronchoscope gives better results in  
32 staging of NSCLC, than each technique alone. However, they mentioned that significant  
33 number of patients had false-negative EBUS-TBNA and EUS-FNA results. Moreover Oki et  
34 al. suggested that very important issue is bronchoscopists experience, which may cause  
35 differences in the results. [22] On the other hand, Wallace et al. showed a EBUS-TBNA  
36 sensitivity of only 69% in a group of 150 patients with lung cancer suspicion. [23]  
37  
38

39 Despite relatively low negative predictive value of EBUS-TBNA, there is an indication  
40 to perform other procedures (e.g., surgical procedures) for final diagnosis in a significant group  
41 of patients. In our study, 56.9% of patients who underwent bronchoscopy did not receive a  
42 definitive diagnosis of the diseases and they have been subjected to other diagnostic procedures  
43  
44  
45  
46  
47  
48  
49  
50  
51  
52  
53  
54  
55  
56  
57  
58  
59  
60

1  
2  
3 or observations. We showed the results of all performed bronchoscopies and three different  
4 methods of material collection (endobronchial biopsy and combination EBUS-TBNA and EUS-  
5 FNA). Moreover, unselected and heterogeneous patients were recruited in three different  
6 hospitals that employ a total of 8 bronchoscopists. In most studies, the evaluation of the  
7 usefulness of EBUS-TBNA and EUS-FNA for detecting malignancy was conducted in selected  
8 patients with high clinical suspicion of the tumor. Small, preselected groups of patients with  
9 high risk of lung cancer could be the reason of the low negative predictive value of  
10 bronchoscopic procedures in these studies. Thus, these observations may not reflected the real  
11 clinical situation.  
12  
13  
14  
15  
16  
17  
18

19 In studies where population was heterogenic regarding the disease (lung cancer,  
20 sarcoidosis, tuberculosis), EBUS-TBNA had diagnostic value only in 60-75% of patients. [24]  
21 Lange et al. showed diagnostic results of EBUS-TBNA in only 61.4% of unselected patients  
22 undergoing routine diagnostic procedures. [25] Fournier et al. examined 185 patients with  
23 extrathoracic malignancy and mediastinal lymphadenopathy in real life practice.  
24 Pathomorphological types of malignancy were successfully identified using EBUS-TBNA in  
25 only 93 patients (50.3%). The diagnostic sensitivity, specificity, negative predictive value, and  
26 positive predictive value were 68.4%, 100%, 53.3%, and 100%, respectively. [26] Murthi et al  
27 conducted research comparing the accuracy of EBUS-TBNA to surgery in diagnosis of hilar  
28 and mediastinal pathologies. EBUS-TBNA for all pathologies had an accuracy of 81.2% and  
29 sensitivity of 55.1%. [27]  
30  
31  
32  
33  
34  
35  
36  
37  
38

### 39 **Conclusions**

40  
41 Comparing all these data, we could conclude that bronchoscopy is vital but not an ideal  
42 technique in the routine diagnosis of respiratory diseases. Our study showed that 41% of  
43 bronchoscopy materials were insufficient to perform reliable pathomorphological examination.  
44 This mainly concerned patients with suspected lung tumor or lymphadenopathy. The use of  
45 brush biopsy, forceps biopsy, bronchoaspirate analysis EBUS-TBNA and EUS-FNA  
46 simultaneously, if desired, was of the highest diagnostic value. However, sometimes this fails  
47 and bronchoscopy must be repeated, or thoracic procedures (e.g. mediastinoscopy or  
48 thoracoscopy) must be performed. We found that the EBUS-TBNA value in daily clinical  
49 practice differed from that in clinical trials. Therefore, precise estimation of the frequency of  
50 individual pathomorphological types of lung cancer, based on material obtained  
51 bronchoscopically, is not possible. However, EBUS-TBNA plays an essential role in staging of  
52 invasive lung cancer. Therefore, its value in the diagnosis of lung cancer is not limited to  
53  
54  
55  
56  
57  
58  
59  
60

1  
2  
3 demonstrating the presence of cancer type, but, above all, to determining the extent of the  
4 disease and qualification for appropriate treatment. It seems that the incidence of lung cancer  
5 with a typical peripheral localization (adenocarcinoma) may be underestimated in comparison  
6 to the incidence of lung cancer with a typical central localization (squamous cell carcinoma,  
7 SCLC), when bronchoscopy is used as the primary diagnostic method.  
8  
9  
10  
11  
12

#### 13 Authorship contribution statement:

14 Conception and design of the study: JB, MF, PK, JP. Administrative support: PK, JP, AP, JB,  
15 AS, JS, MM, PK, RK, JM. Provision of study material or patients: JP, AP, JB, AS, JS, MM,  
16 PK, RK, JM. Collection and assembly of data: JB, MF, PK, JP, AP, JB, AS, JS, MM, PK, RK.  
17 Data analysis and interpretation: JB, MF, PK. Manuscript writing: JB, MF, PK. All authors  
18 gave final approval of the published manuscript.  
19  
20  
21  
22  
23  
24

#### 25 Data Availability Statement:

26 The data that supports the findings of this study are available from the corresponding author  
27 upon reasonable request.  
28  
29  
30  
31

#### 32 Conflicts of Interest:

33 The authors declare no potential conflicts of interest.  
34  
35  
36  
37

#### 38 Fundings:

39 This research did not receive any specific grant from funding agencies in the public,  
40 commercial, or not-for-profit sectors.  
41  
42  
43  
44  
45  
46  
47

#### 48 Acknowledgements:

49 The authors would like to thank prof. Tadeusz Orłowski and prof. Maciej Krzakowski for  
50 their helpful comments that improved the research and manuscript.  
51  
52  
53  
54

#### 55 References

- 56 1. Siegel RL, Miller KD, Jemal A. Cancer Statistics. CA Cancer J Clin. 2017; 67: 7-30.  
57  
58  
59  
60

- 1  
2  
3 2. Travis WD, Brambilla E, Burke AP, et al. Introduction to the 2015 World Health  
4 Organization Classification of Tumors of the Lung, Pleura, Thymus, and Heart. *Thorac*  
5 *Oncol.* 2015; 10: 1240-1242.
- 6  
7  
8 3. Bray F, Ferlay J, Soerjomataram I, et al. Global Cancer Statistics 2018: GLOBOCAN  
9 estimates of incidence and mortality worldwide for 36 cancers in 185 countries. *CA*  
10 *Cancer J Clin.* 2018; 68: 394-424.
- 11  
12 4. Houston KA, Henley SJ, Li J, et al. Patterns in lung cancer incidence rates and trends by  
13 histologic type in the United States, 2004-2009. *Lung Cancer.* 2014; 86: 22-28.
- 14  
15 5. Zugazagoitia J, Enguita AB, Nuñez JA, Iglesias L, Ponce S. The new IASLC/ATS/ERS  
16 lung adenocarcinoma classification from a clinical perspective: current concepts and  
17 future prospects. *J Thorac Dis.* 2014;6(Suppl 5): S526-S536
- 18  
19 6. Vilmann P, Clementsen PF, Colella S, et al. Combined endobronchial and oesophageal  
20 endosonography for the diagnosis and staging of lung cancer. European Society of  
21 Gastrointestinal Endoscopy (ESGE) Guideline, in cooperation with the European  
22 Respiratory Society (ERS) and the European Society of Thoracic Surgeons (ESTS). *Eur*  
23 *Respir J.* 2015; 46: 40-60.
- 24  
25 7. Gomez-Caro A, Garcia S, Reguart N, Arguis P, Sanchez M et al. Incidence of occult  
26 mediastinal node involvement in cN0 non-small-cell lung cancer patients after negative  
27 uptake of positron emission tomography/computer tomography scan. *Eur J Cardiothorac*  
28 *Surg.* 2010; 37: 1168-1174.
- 29  
30 8. Watanabe S, Asamura H, Suzuki K, Tsuchiya R. Problems in diagnosis and surgical  
31 management of clinical N1 non-small cell lung cancer. *Ann Thorac Surg.* 2005; 79: 1682-  
32 1685
- 33  
34 9. Rivera MP, Wahidi MM, Mehta AC. Establishing the diagnosis of lung cancer: Diagnosis  
35 and management of lung cancer, 3rd ed: American College of Chest Physicians evidence-  
36 based clinical practice guidelines. *Chest.* 2013; 143: 142-165.
- 37  
38 10. Micames CG, McCrory DC, Pavey DA, et al. Endoscopic ultrasound-guided fine-needle  
39 aspiration for non-small cell lung cancer staging: A systematic review and meta-analysis.  
40 *Chest.* 2007. 131: 539-548.
- 41  
42 11. Sutedja TG, Codrington H, Risse EK, et al. Autofluorescence bronchoscopy improves  
43 staging of radiographically occult lung cancer and has an impact on therapeutic strategy.  
44 *Chest.* 2001. 120: 1327-1332.
- 45  
46 12. Schmid-Bindert G, Wang Y, Jiang H, et al. EBUS-TBNA provides highest RNA yield for  
47 multiple biomarker testing from routinely obtained small biopsies in non-small cell lung  
48  
49  
50  
51  
52  
53  
54  
55  
56  
57  
58  
59  
60

- 1  
2  
3 cancer patients - a comparative study of three different minimal invasive sampling  
4 methods. PLoS One. 2013; 8: 77948.  
5  
6  
7 13. Navani N, Brown JM, Nankivell M, et al. Suitability of EBUS-TBNA specimens for  
8 subtyping and genotyping of NSCLC: a multi-centre study of 774 patients. Am J Respir  
9 Crit Care Med. 2012; 185: 1316-1322.  
10  
11  
12 14. Esterbrook G, Anathhanam S, Plant PK. Adequacy of endobronchial ultrasound  
13 transbronchial needle aspiration samples in the subtyping of non-small cell lung cancer.  
14 Lung Cancer. 2013; 80: 30-34.  
15  
16  
17 15. Chin R Jr, Cappellari JO, McCain TW, et al. Increasing use of bronchoscopic needle  
18 aspiration to diagnose small cell lung cancer. Mayo Clin Proc. 2000; 75: 796-801.  
19  
20  
21 16. Fernandez-Villar A, Botana M, Leiro V, et al. Validity and reliability of transbronchial  
22 needle aspiration for diagnosing mediastinal adenopathies. BMC Pulm Med. 2010; 10: 24.  
23  
24  
25 17. Sharafkhaneh A, Baaklini W, Gorin AB, et al. Yield of transbronchial needle aspiration in  
26 diagnosis of mediastinal lesions. Chest. 2003; 124: 2131-2135.  
27  
28  
29 18. Pasko E, Serafin-Bromblik J, Piekorz W, et al. Combined endobronchial and endoscopic  
30 ultrasound-guided needle aspiration performed by single ultrasound bronchoscopes routine  
31 videobronchoscopy for diagnosis of advanced lung cancer – a prospective study. Eur Respir J.  
32 2016; 48: 2034.  
33  
34  
35 19. Verma A, Jeon K, Koh WJ, et al. Endobronchial ultrasound-guided transbronchial needle  
36 aspiration for the diagnosis of central lung parenchymal lesions. Yonsei Med J. 2013; 54:  
37 672-678.  
38  
39  
40 20. Tournoy KG, Rintoul RC, van Meerbeeck JP, et al. EBUS-TBNA for the diagnosis of  
41 central parenchymal lung lesions not visible at routine bronchoscopy. Lung Cancer. 2009;  
42 63: 45-49.  
43  
44  
45 21. Zhao H, Xie Z, Zhou ZL, et al. Diagnostic value of endobronchial ultrasound-guided  
46 transbronchial needle aspiration in intrapulmonary lesions. Chin Med J. 2013; 126: 4312-  
47 4315.  
48  
49  
50 22. Oki M, Saka H, Ando M, et al. Endoscopic ultrasound-guided fine needle aspiration and  
51 endobronchial ultrasound-guided transbronchial needle aspiration: Are two better than one  
52 in mediastinal staging of non-small cell lung cancer? J Thorac Cardiovasc Surg. 2014;  
53 148: 1169-1177.  
54  
55  
56 23. Wallace MB, Pascual JM, Raimondo M, et al. Minimally invasive endoscopic staging of  
57 suspected lung cancer. JAMA. 2008; 299: 540-546.  
58  
59  
60

- 1  
2  
3 24. Madan K, Mohan A, Ayub II, et al. Initial experience with endobronchial ultrasound-guided transbronchial needle aspiration (EBUS-TBNA) from a tuberculosis endemic population. *J Bronchol Interv Pulmonol*. 2014; 21: 208-214.
- 4  
5  
6  
7  
8 25. Lange T, Kunzendorf F, Pfeifer M, et al. Endobronchial ultrasound-guided transbronchial needle aspiration in routine care-plenty of benign results and follow-up tests. *Int J Clin Pract*. 2012; 66: 438-445.
- 9  
10  
11  
12  
13 26. Fournier C, Hermant C, Gounant V, et al. Diagnostic of mediastinal lymphadenopathy in extrathoracic cancer: a place for EBUS-TBNA in real life practice? *Respir Med Res*. 2019; 75: 1–4.
- 14  
15  
16  
17  
18 27. Murthi M, Donna E, Arias S, et al. Diagnostic Accuracy of Endobronchial Ultrasound-Guided Transbronchial Needle Aspiration (EBUS-TBNA) in Real Life. *Front Med (Lausanne)*. 2020; 7:118.
- 19  
20  
21  
22  
23  
24  
25

26  
27 Table 1. The results of varies techniques during bronchoscopy in the diagnosis of individual pathomorphological types of lung cancer depending on place of collecting the material and nodal station.

28  
29  
30  
31

| Material                                      | SCLC        | Adenocarcinoma | Squamous cell carcinoma | NOS         | Total lung cancer |
|-----------------------------------------------|-------------|----------------|-------------------------|-------------|-------------------|
| EBUS-TBNA/EUS-FNA of lymph nodes              | 250 (27.7%) | 331 (36.7%)    | 209 (23.1%)             | 114 (12.5%) | 904 (100%)        |
| EBUS-TBNA/EUS-FNA of tumor                    | 88 (24.7%)  | 94 (25.8%)     | 135 (37.2%)             | 44 (12.3%)  | 361 (100%)        |
| EBUS-TBNA/EUS-FNA metastases to adrenal gland | 3 (42.9%)   | 1 (14.3%)      | 2 (28.6%)               | 1 (14.3%)   | 7 (100%)          |

32  
33  
34  
35  
36  
37  
38  
39  
40  
41  
42  
43  
44  
45  
46  
47  
48  
49  
50  
51  
52  
53  
54  
55  
56  
57  
58  
59  
60

|                               |           |           |             |              |            |
|-------------------------------|-----------|-----------|-------------|--------------|------------|
| Forceps<br>biopsy of<br>tumor | 156 (22%) | 163 (25%) | 270 (41.5%) | 62<br>(9.5%) | 651 (100%) |
|-------------------------------|-----------|-----------|-------------|--------------|------------|

Figure 1. Results of pathomorphological examination carried out on material obtained from 5279 bronchoscopies (entire study population)

Figure 2. The incidence of individual pathomorphological types of LC in the entire study group of lung cancer patients

Figure 3. The incidence of individual pathomorphological types of LC according to the gender of patients with lung cancer

Figure 4. Percentage of patients with different types of lung cancer detected in materials collected with different bronchoscopic techniques. Frequency of different types of lung cancer was calculated in the whole group of patients undergoing a given bronchoscopic procedure (100%), which resulted in the diagnosis of lung cancer

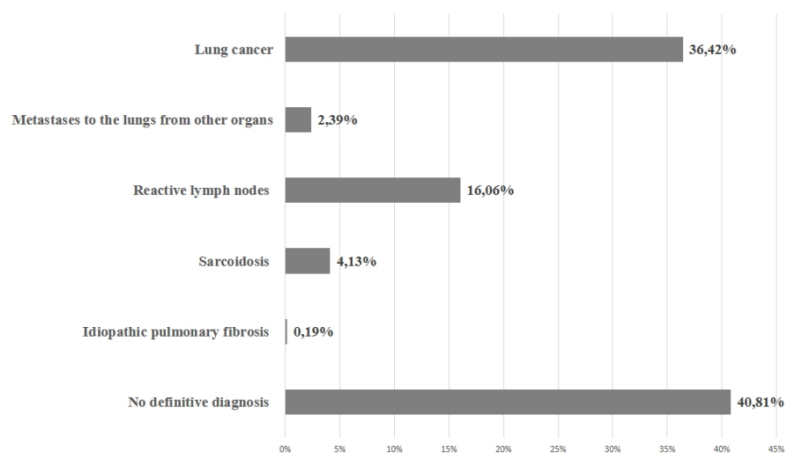

108x60mm (300 x 300 DPI)



1  
2  
3  
4  
5  
6  
7  
8  
9  
10  
11  
12  
13  
14  
15  
16  
17  
18  
19  
20  
21  
22  
23  
24  
25  
26  
27  
28  
29  
30  
31  
32  
33  
34  
35  
36  
37  
38  
39  
40  
41  
42  
43  
44  
45  
46  
47  
48  
49  
50  
51  
52  
53  
54  
55  
56  
57  
58  
59  
60

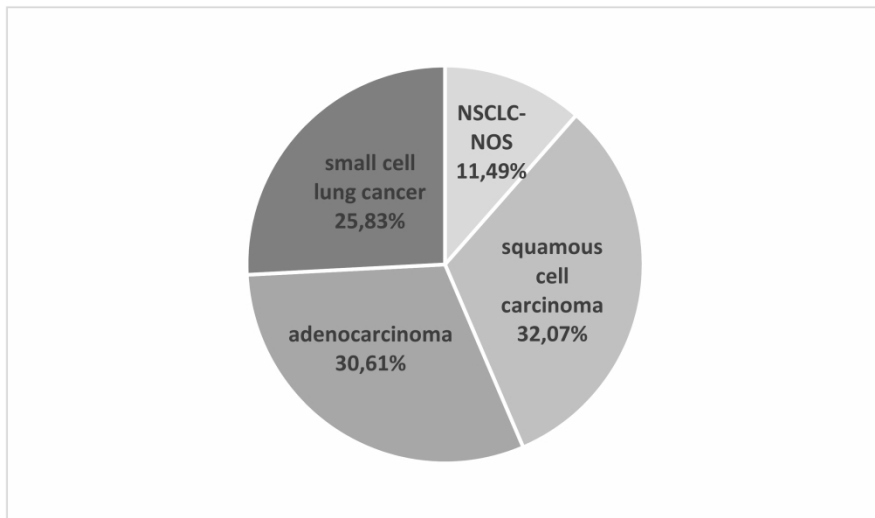

296x209mm (300 x 300 DPI)

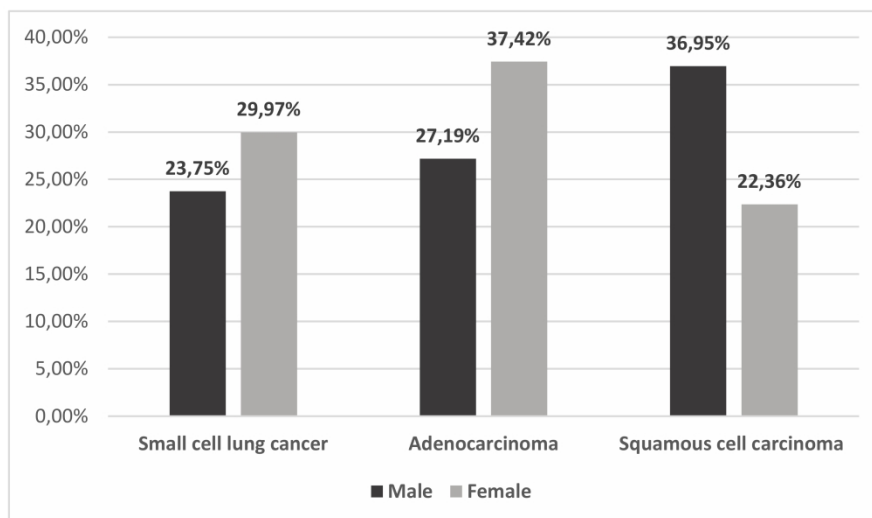

296x209mm (300 x 300 DPI)

1  
2  
3  
4  
5  
6  
7  
8  
9  
10  
11  
12  
13  
14  
15  
16  
17  
18  
19  
20  
21  
22  
23  
24  
25  
26  
27  
28  
29  
30  
31  
32  
33  
34  
35  
36  
37  
38  
39  
40  
41  
42  
43  
44  
45  
46  
47  
48  
49  
50  
51  
52  
53  
54  
55  
56  
57  
58  
59  
60

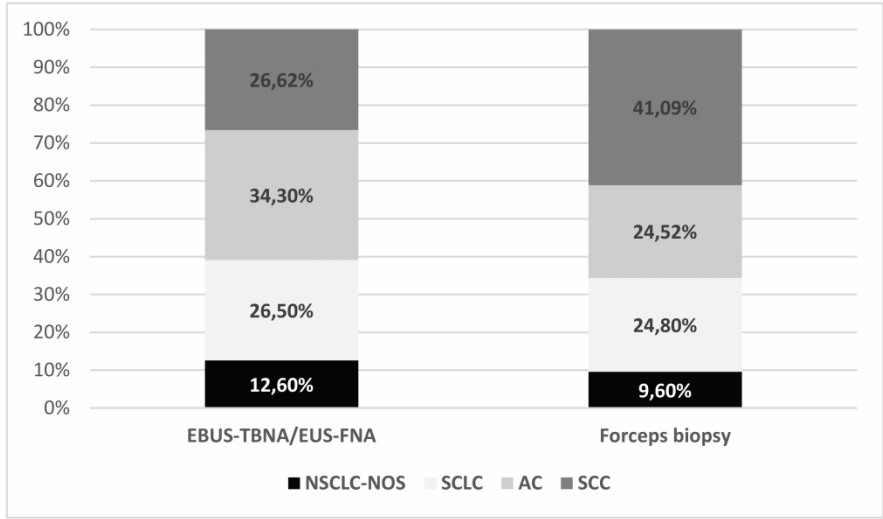

296x209mm (300 x 300 DPI)

STROBE Statement—Checklist of items that should be included in reports of *cohort studies*

|                              | Item No | Recommendation                                                                                                                                                                                    | Page No |
|------------------------------|---------|---------------------------------------------------------------------------------------------------------------------------------------------------------------------------------------------------|---------|
| <b>Title and abstract</b>    | 1       | (a) Indicate the study's design with a commonly used term in the title or the abstract                                                                                                            | 2       |
|                              |         | (b) Provide in the abstract an informative and balanced summary of what was done and what was found                                                                                               | 2       |
| <b>Introduction</b>          |         |                                                                                                                                                                                                   |         |
| Background/rationale         | 2       | Explain the scientific background and rationale for the investigation being reported                                                                                                              | 4-5     |
| Objectives                   | 3       | State specific objectives, including any prespecified hypotheses                                                                                                                                  | 6       |
| <b>Methods</b>               |         |                                                                                                                                                                                                   |         |
| Study design                 | 4       | Present key elements of study design early in the paper                                                                                                                                           | 6-7     |
| Setting                      | 5       | Describe the setting, locations, and relevant dates, including periods of recruitment, exposure, follow-up, and data collection                                                                   | 6-7     |
| Participants                 | 6       | (a) Give the eligibility criteria, and the sources and methods of selection of participants. Describe methods of follow-up                                                                        | 6-7     |
|                              |         | (b) For matched studies, give matching criteria and number of exposed and unexposed                                                                                                               | 6-7     |
| Variables                    | 7       | Clearly define all outcomes, exposures, predictors, potential confounders, and effect modifiers. Give diagnostic criteria, if applicable                                                          | 6-7     |
| Data sources/<br>measurement | 8*      | For each variable of interest, give sources of data and details of methods of assessment (measurement). Describe comparability of assessment methods if there is more than one group              | 6-7     |
| Bias                         | 9       | Describe any efforts to address potential sources of bias                                                                                                                                         | 6-7     |
| Study size                   | 10      | Explain how the study size was arrived at                                                                                                                                                         | 6-7     |
| Quantitative variables       | 11      | Explain how quantitative variables were handled in the analyses. If applicable, describe which groupings were chosen and why                                                                      | 6-7     |
| Statistical methods          | 12      | (a) Describe all statistical methods, including those used to control for confounding                                                                                                             | 6-7     |
|                              |         | (b) Describe any methods used to examine subgroups and interactions                                                                                                                               |         |
|                              |         | (c) Explain how missing data were addressed                                                                                                                                                       |         |
|                              |         | (d) If applicable, explain how loss to follow-up was addressed                                                                                                                                    |         |
|                              |         | (e) Describe any sensitivity analyses                                                                                                                                                             |         |
| <b>Results</b>               |         |                                                                                                                                                                                                   |         |
| Participants                 | 13*     | (a) Report numbers of individuals at each stage of study—eg numbers potentially eligible, examined for eligibility, confirmed eligible, included in the study, completing follow-up, and analysed | 8       |
|                              |         | (b) Give reasons for non-participation at each stage                                                                                                                                              |         |
|                              |         | (c) Consider use of a flow diagram                                                                                                                                                                |         |
| Descriptive data             | 14*     | (a) Give characteristics of study participants (eg demographic, clinical, social) and information on exposures and potential confounders                                                          | 8       |
|                              |         | (b) Indicate number of participants with missing data for each variable of interest                                                                                                               |         |
|                              |         | (c) Summarise follow-up time (eg, average and total amount)                                                                                                                                       |         |
| Outcome data                 | 15*     | Report numbers of outcome events or summary measures over time                                                                                                                                    | 8       |

|    |                          |    |                                                                                                                                                                                                              |       |
|----|--------------------------|----|--------------------------------------------------------------------------------------------------------------------------------------------------------------------------------------------------------------|-------|
| 1  | Main results             | 16 | (a) Give unadjusted estimates and, if applicable, confounder-adjusted estimates and their precision (eg, 95% confidence interval). Make clear which confounders were adjusted for and why they were included | 8     |
| 2  |                          |    | (b) Report category boundaries when continuous variables were categorized                                                                                                                                    |       |
| 3  |                          |    | (c) If relevant, consider translating estimates of relative risk into absolute risk for a meaningful time period                                                                                             |       |
| 4  |                          |    |                                                                                                                                                                                                              |       |
| 5  | Other analyses           | 17 | Report other analyses done—eg analyses of subgroups and interactions, and sensitivity analyses                                                                                                               | -     |
| 6  | <b>Discussion</b>        |    |                                                                                                                                                                                                              |       |
| 7  | Key results              | 18 | Summarise key results with reference to study objectives                                                                                                                                                     | 9     |
| 8  | Limitations              | 19 | Discuss limitations of the study, taking into account sources of potential bias or imprecision. Discuss both direction and magnitude of any potential bias                                                   | 9     |
| 9  | Interpretation           | 20 | Give a cautious overall interpretation of results considering objectives, limitations, multiplicity of analyses, results from similar studies, and other relevant evidence                                   | 10-11 |
| 10 | Generalisability         | 21 | Discuss the generalisability (external validity) of the study results                                                                                                                                        | 12    |
| 11 | <b>Other information</b> |    |                                                                                                                                                                                                              |       |
| 12 | Funding                  | 22 | Give the source of funding and the role of the funders for the present study and, if applicable, for the original study on which the present article is based                                                | 13    |

\*Give information separately for exposed and unexposed groups.

**Note:** An Explanation and Elaboration article discusses each checklist item and gives methodological background and published examples of transparent reporting. The STROBE checklist is best used in conjunction with this article (freely available on the Web sites of PLoS Medicine at <http://www.plosmedicine.org/>, Annals of Internal Medicine at <http://www.annals.org/>, and Epidemiology at <http://www.epidem.com/>). Information on the STROBE Initiative is available at <http://www.strobe-statement.org>.

# BMJ Open

## Observational cross-sectional study of 5279 bronchoscopy results for the practical effectiveness of various biopsy techniques in the diagnosis of lung diseases with particular emphasis on lung cancer

|                                 |                                                                                                                                                                                                                                                                                                                                                                                                                                                                                                                                                                                                                                       |
|---------------------------------|---------------------------------------------------------------------------------------------------------------------------------------------------------------------------------------------------------------------------------------------------------------------------------------------------------------------------------------------------------------------------------------------------------------------------------------------------------------------------------------------------------------------------------------------------------------------------------------------------------------------------------------|
| Journal:                        | <i>BMJ Open</i>                                                                                                                                                                                                                                                                                                                                                                                                                                                                                                                                                                                                                       |
| Manuscript ID                   | bmjopen-2020-043820.R3                                                                                                                                                                                                                                                                                                                                                                                                                                                                                                                                                                                                                |
| Article Type:                   | Original research                                                                                                                                                                                                                                                                                                                                                                                                                                                                                                                                                                                                                     |
| Date Submitted by the Author:   | 28-Jun-2021                                                                                                                                                                                                                                                                                                                                                                                                                                                                                                                                                                                                                           |
| Complete List of Authors:       | Błach, Justyna; Medical University of Lublin, Frąk, Małgorzata; Medical University of Lublin<br>Krawczyk, Pawel; Medical University of Lublin<br>Pankowski, Juliusz; Specialist Hospital for Lung Diseases "Rebirth" Klara Jelska<br>Pankowski, Adam; SilverSoft<br>Buczowski, Jarosław; Medical University of Lublin<br>Szlubowski, Artur; Specialist Hospital for Lung Diseases "Rebirth" Klara Jelska<br>Siwiec, Jan; Medical University of Lublin<br>Krudyś, Piotr; Izer-Med<br>Michnar, Marek; Medical University of Lublin<br>Kieszko, Robert; Medical University of Lublin<br>Milanowski, Janusz; Medical University of Lublin |
| <b>Primary Subject Heading</b>: | Respiratory medicine                                                                                                                                                                                                                                                                                                                                                                                                                                                                                                                                                                                                                  |
| Secondary Subject Heading:      | Oncology                                                                                                                                                                                                                                                                                                                                                                                                                                                                                                                                                                                                                              |
| Keywords:                       | Bronchoscopy < THORACIC MEDICINE, Respiratory tract tumours < ONCOLOGY, RESPIRATORY MEDICINE (see Thoracic Medicine)                                                                                                                                                                                                                                                                                                                                                                                                                                                                                                                  |
|                                 |                                                                                                                                                                                                                                                                                                                                                                                                                                                                                                                                                                                                                                       |

SCHOLARONE™  
Manuscripts

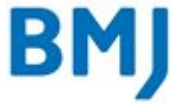

I, the Submitting Author has the right to grant and does grant on behalf of all authors of the Work (as defined in the below author licence), an exclusive licence and/or a non-exclusive licence for contributions from authors who are: i) UK Crown employees; ii) where BMJ has agreed a CC-BY licence shall apply, and/or iii) in accordance with the terms applicable for US Federal Government officers or employees acting as part of their official duties; on a worldwide, perpetual, irrevocable, royalty-free basis to BMJ Publishing Group Ltd ("BMJ") its licensees and where the relevant Journal is co-owned by BMJ to the co-owners of the Journal, to publish the Work in this journal and any other BMJ products and to exploit all rights, as set out in our [licence](#).

The Submitting Author accepts and understands that any supply made under these terms is made by BMJ to the Submitting Author unless you are acting as an employee on behalf of your employer or a postgraduate student of an affiliated institution which is paying any applicable article publishing charge ("APC") for Open Access articles. Where the Submitting Author wishes to make the Work available on an Open Access basis (and intends to pay the relevant APC), the terms of reuse of such Open Access shall be governed by a Creative Commons licence – details of these licences and which [Creative Commons](#) licence will apply to this Work are set out in our licence referred to above.

Other than as permitted in any relevant BMJ Author's Self Archiving Policies, I confirm this Work has not been accepted for publication elsewhere, is not being considered for publication elsewhere and does not duplicate material already published. I confirm all authors consent to publication of this Work and authorise the granting of this licence.

1  
2  
3 **Observational cross-sectional study of 5279 bronchoscopy results for the practical**  
4 **effectiveness of various biopsy techniques in the diagnosis of lung diseases with**  
5 **particular emphasis on lung cancer**  
6  
7  
8  
9

10 Justyna Błach<sup>1,2\*</sup>, Małgorzata Frąk<sup>1\*</sup>, Paweł Krawczyk<sup>1</sup>, Juliusz Pankowski<sup>3</sup>, Adam  
11 Pankowski<sup>4</sup>, Jarosław Buczkowski<sup>1,5</sup>, Artur Szlubowski<sup>3,6</sup>, Jan Siwiec<sup>1</sup>, Piotr Krudys<sup>6</sup>, Marek  
12 Michnar<sup>1</sup>, Robert Kieszko<sup>1</sup>, Janusz Milanowski<sup>1</sup>  
13  
14

15 \* authors equally contributing  
16  
17

- 18  
19  
20 1. Department of Pneumonology, Oncology and Allergology, Medical University of Lublin,  
21 20-954 Lublin; Poland  
22  
23 2. Department of Clinical Immunology, Medical University of Lublin, 20-954 Lublin; Poland  
24  
25 3. Specialist Hospital for Lung Diseases "Rebirth" Klara Jelska, 34-500 Zakopane, Poland  
26  
27 4. SilverSoft, Warszewska 64/1, 72-004 Pilchowo, Szczecin, Poland  
28  
29 5. Department of Lung Diseases and Intensive Care, Independent Public Provincial John of  
30 God Hospital in Lublin, 20-400 Lublin, Poland  
31  
32 6. Izerski Pulmonology and Chemotherapy Center "IZER-MED", 58-580 Szklarska Poręba,  
33 Poland  
34  
35  
36  
37  
38  
39  
40  
41

42 Short title: **The yield of bronchoscopy in the diagnosis of lung cancer**

43 **Corresponding author:**

44 Justyna Błach MD  
45

46 Department of Pneumonology, Oncology and Allergology  
47

48 Medical University of Lublin, Poland  
49

50 Jaczewskiego 8, 20-954 Lublin, Poland  
51

52 tel. +48 81 724 42 93  
53

54 e-mail: [justynablach91@gmail.com](mailto:justynablach91@gmail.com)  
55  
56  
57  
58  
59  
60



## Abstract

### Introduction

Bronchoscopy is the main method in the diagnosis of various lung diseases. Endobronchial ultrasound transbronchial needle aspiration (EBUS-TBNA) is the most modern bronchoscopic technique useful in diagnosis and staging of lung cancer.

### Objectives

The aim of the study was to assess the yield of bronchoscopy in patients with suspected various respiratory diseases including lung cancer. In particular, we examined the efficiency of different biopsy techniques in the diagnosis of lung cancer in correlation with its localization and pathomorphological type.

### Patients and Methods

The results of pathomorphological examinations from 5279 bronchoscopies performed in 2016-2018 were analyzed. The material was collected with endobronchial ultrasound transbronchial needle aspiration (EBUS-TBNA), endoscopic ultrasound guided fine needle aspiration (EUS-FNA) and endobronchial forceps biopsy. Clinical and demographic factors were analyzed using the Fisher  $\chi^2$  test.

### Results

5279 patients were diagnosed due to various respiratory symptoms. Lung cancer was confirmed in 36.42% of patients. 40.81% of patients had no definitive pathomorphological diagnosis. Among patients with lung cancer, the most frequent diagnosis was non-small cell lung cancer: squamous cell lung cancer (SCC) - 32.07% and adenocarcinoma (AC) - 30.61%, then small cell lung cancer (SCLC) - 25.83% and not otherwise specified non-small cell lung cancer (NSCLC NOS) - 11.49%. Diagnosis of SCC was obtained significantly more often ( $\chi^2=43.143$ ,  $p<0.000001$ ) by forceps biopsy (41.09%) than by EBUS-TBNA/EUS-FNA (26.62%). On the contrary, diagnosis of AC or NSCLC NOS was significantly more often ( $\chi^2=20.394$ ,  $p<0.000007$  and  $\chi^2=3.902$ ,  $p<0.05$ , respectively) observed in EBUS-TBNA/EUS-FNA (34.31% and 12.6%) than in endobronchial biopsies (24.52% and 9.64%).

### Conclusions

The use of bronchoscopy in the diagnosis of various lung diseases is vital but also has many limitations. Effectiveness of EBUS-TBNA and endobronchial forceps biopsy in diagnosis of lung cancer is strongly affected by tumor localization and type of cancer.

**Key words:** lung cancer; bronchoscopy; endobronchial biopsy; EBUS-TBNA; EUS-FNA

## Article summary

### *Strengths and limitations of this study*

1. 5 279 patients were enrolled to the study group which makes it one of the largest studies in the world with assessment of bronchoscopy effectiveness in routine clinical practice.
2. We analyzed bronchoscopies performed in 2016-2018 in a few Polish medical centers across the country, in a diversified population which ensures a high level of generalisability.
3. The study is an important contribution to the epidemiological data of advanced lung cancer in Poland.
4. Bronchoscopies were performed by 8 different bronchoscopists. This fact may cause human-dependent variation in results.
5. Results of pathomorphological assessment of the material obtained during single bronchoscopy was analyzed. Patients without diagnosed disease in the bronchoscopic material underwent further diagnostics using other methods or in other centers. Therefore, we were unable to report a definitive diagnosis in patients with inconclusive results of diagnostic procedures.

## Introduction

Epidemiological analyses indicate that lung cancer (LC) is the most common cause of cancer-related deaths. It is usually diagnosed in an unresectable, advanced stage. [1, 2] Lung cancer is the most common cancer in men and the third most common in women. In 2018, there were more than 2 million new cases of lung cancer worldwide. [3]

In the United States from 2004 to 2009, a total of 1,096,276 lung cancer cases were diagnosed and reported. This American study investigated the histologic type of lung cancer and demographic characteristics of the patients. The incidence of individual types of LC was as follows: small cell lung cancer (SCLC) – 14.9%, squamous cell carcinoma (SCC) – 21.9%, adenocarcinoma (AC) – 37.1% and large cell carcinoma (LCC) – 3.2% of cases. [4]

It is difficult to obtain accurate epidemiological data on the occurrence of individual pathomorphological types of advanced LC in Poland. Up to date, no epidemiological studies have been conducted on a sufficiently large group of patients with advanced lung cancer to obtain reliable results. Statistics on pathomorphological diagnoses of lung cancer in material from bronchoscopy have not been conducted so far. In Poland, the main source of such data is the National Lung Cancer Registry which only contains details about patients undergoing surgery in earlier stages of the disease. There were 17,783 patients diagnosed and operated in Polish thoracic surgery centers and registered in the National Lung Cancer Registry in the years

1  
2  
3 2014-2018. This group includes: 48.7% of patients with AC, 40.8% of patients with SCC,  
4 6.45% of patients with LCC, 2.1% of patients with adenosquamous cell carcinoma, 1.05% of  
5 patients with SCLC and 0.9% of patients with non-otherwise specified (NOS) non-small cell  
6 lung cancer (NSCLC). This material included low percentage of patients with SCLC (usually  
7 an inoperable type of lung cancer) and patients with NSCLC-NOS (large surgical material is  
8 easier for pathomorphological examination which is a factor of reducing misdiagnosis).  
9 According to IASLC (International Association for the Study of Lung Cancer)  
10 recommendations, large cell carcinoma should be diagnosed only in surgical materials extracted  
11 from the entire resected tumor. [5] Therefore, this type of cancer was recorded in surgical  
12 pathology in non-advanced NSCLC patients and almost absent in patients with advanced lung  
13 cancer diagnosed with tumor biopsy. [2]

22 Due to different locations of tumor types in the lungs or metastatic lymph nodes, varied  
23 approaches are required to cancer diagnosis. The peripheral location is characteristic for AC,  
24 while squamous and small cell carcinomas most often are located centrally. Bronchoscopy is  
25 an appropriate method for detecting LC and the endobronchial ultrasound-guided with  
26 transbronchial needle aspiration (EBUS-TBNA) procedure has an essential role in the  
27 investigation of lung cancer. If the tumor is centrally located and infiltrated the bronchus, the  
28 most optimal procedure seems to be the endobronchial biopsy using a brush or forceps. In  
29 contrast, adenocarcinoma frequently metastasizes to the mediastinal lymph nodes, which may  
30 be available on EBUS-TBNA or EUS-FNA procedures.

37 Metastasis to mediastinal lymph nodes is typical for each of types of lung cancer. We  
38 distinguish compartments of the mediastinal lymph nodes: superior mediastinal nodes (stations  
39 2, 3 and 4), aortic nodes (stations 5 and 6), inferior mediastinal nodes (stations 7, 8, 9), hilar  
40 and interlobar lymph nodes (stations 10 and 11) and peripheral lymph nodes (station 12 for  
41 lobar nodes, station 13 for segmental nodes and station 14 for subsegmental nodes). EBUS-  
42 TBNA is most often used in diagnosis of superior mediastinal nodes, station 7 of inferior  
43 mediastinal nodes and stations 10, 11, 12 lymph nodes. EUS-FNA is preferred in diagnosis of  
44 superior mediastinal nodes and stations 7, 8 and 9 of inferior mediastinal nodes. Moreover EUS-  
45 FNA is used for sampling subphrenic lymph nodes and metastases in liver and left adrenal  
46 gland. Both methods – EBUS-TBNA and EUS-FNA are preferred for mediastinal lymph nodes  
47 assessment for evaluation of N-stage in NSCLC patients. [6] These two methods could be used  
48 in sampling visible tumors localized in central airways but also peripherally to the main bronchi,  
49 i.e. in lobar or even segmental bronchi.

1  
2  
3 Lung cancer staging is initially assessed through imaging studies. Normal mediastinum  
4 lymph nodes are defined below 10 mm in computed tomography (CT). Such a size of these  
5 lymph nodes suggests the N0 clinical stage. Currently, sampling for N0 nodes is not  
6 recommended, while surgery is the primary treatment method for N0/N1 stage of lung cancer.  
7 However, everyday practice shows that it is worth collecting non-enlarged nodes for  
8 pathomorphological examination, because cancer cells are often found in such nodes. [7,8]  
9

10  
11  
12 The sensitivity of detecting lung cancer using different bronchoscopy methods varies  
13 from 34% to 88% depending on the size and location of the tumor and preliminary diagnosis of  
14 the patients. [9] Meta-analysis of 18 studies which included a total of 1,201 LC patients was  
15 performed for assessment of sensitivity and specificity of ultrasound-guided fine needle  
16 aspiration in mediastinal staging of lung cancer. Authors showed sensitivity of 83% (range 45-  
17 100%) and specificity of 97% (range 88-100%) of these methods. [10] In eight studies limited  
18 to patients with enlarged mediastinal lymph nodes seen on CT, sensitivity was 90% (95% CI:  
19 84 to 94%) and specificity was 97% (95% CI: 95 to 98%). In patients without enlarged  
20 mediastinal lymph nodes visible on CT, the overall sensitivity was 58% (95% CI: 39-75%).  
21 Therefore, the use of EBUS-TBNA increases the accuracy in the estimation of the stage of lung  
22 cancer and may radically influence the further treatment of the patient and the selection of the  
23 treatment methods. EUS-FNA enables confirming the presence of distant metastases, which has  
24 a decisive impact on therapeutic decisions. However, all false negative results delay cancer  
25 diagnosis and force the repetition of diagnostic procedures including surgery. Earlier detection  
26 of lung cancer gives patients the chance for better treatment. [11]  
27  
28  
29  
30  
31  
32  
33  
34  
35  
36  
37  
38  
39  
40

## 41 **Aim**

42  
43  
44 The objective of our study was a descriptive analysis of lung diseases diagnoses,  
45 especially lung cancer, established by various bronchoscopic procedures. We devoted special  
46 attention to the possibility of diagnosis of individual pathomorphological types of LC with  
47 various techniques used for collecting materials during bronchoscopy.  
48  
49  
50  
51  
52  
53  
54

## 55 **Material and methods**

56  
57 In our observational cross-sectional study, we analyzed the results of  
58 pathomorphological examination carried out on the material obtained during 5279  
59 bronchoscopies performed in 2016-2018. Those bronchoscopies were performed in three Polish  
60

1  
2  
3 pulmonology departments. The study included 1892 women and 3387 men, with median age  
4 of 65 years.

5  
6 The study was retrospective and relied fully on the analysis of documents gathered, thus  
7 eliminating the need for collaboration between patients and researchers. No patients were  
8 enrolled specifically to carry out this study.

9  
10  
11 Various diseases of the respiratory system were indication for bronchoscopy: 3127  
12 (59.2%) patients had suspicion of chest tumor in computed tomography, 882 (16.7%) patients  
13 demonstrated hilar lymphadenopathy, 205 (3.9%) patients had suspicion of sarcoidosis and 20  
14 (0.4%) patients had suspicion of pulmonary fibrosis. Other indications for bronchoscopy  
15 occurred in 1045 (19.8%) patients (e.g. suspicion of tuberculosis, chronic cough, hemoptysis,  
16 etc.). In patients with suspected cancer, samples of the tissue were acquired through  
17 bronchoscopy and the technique was chosen in compliance with tumor or metastatic lymph  
18 node's location as it is described in the introduction. Forceps biopsies were performed using  
19 Olympus BF-1T180 and Pentax EB-1970K bronchoscopes, EBUS-TBNA – using Olympus  
20 BF-UC180F and Pentax EB-1970UK bronchoscopes (22-gauge needles), and EUS-FNA –  
21 using Olympus GF-UCT180 endoscope. Premedication for bronchoscopy was under local or  
22 general anesthesia, depending on the situation.

23  
24  
25 Samples underwent pathomorphological examination which included hematoxylin-  
26 eosin (H&E) staining, mucicarmine staining and immunohistochemistry (IHC) examination,  
27 such as staining of TTF-1 (thyroid transcription factor 1) and p63/p40. Samples diagnosed with  
28 non-squamous NSCLC were in-depth reported and underwent molecular testing for the  
29 presence of *EGFR* gene mutation by real-time PCR technique (RT-PCR), *ALK* gene  
30 rearrangement and PD-L1 expression by IHC. PD-L1 expression was also assessed in SCC  
31 patients. Large cell carcinoma (LCC) of the lung according to the 2015 World Health  
32 Organization (WHO) Classification of Tumors of the Lung, Pleura, Thymus and Heart cannot  
33 be diagnosed in small specimens and aspiration biopsy materials. The diagnosis of LCC can  
34 only be made in the postoperative material. Therefore, there were no patients diagnosed with  
35 LCC in our study. Such patients were included in the group of patients diagnosed with NSCLC  
36 NOS. Chromogranin and synaptophysin was used in IHC examination of neuroendocrine  
37 tumors (small cell lung cancer or NSCLC NOS). All the centers participating in the study used  
38 these same procedures described above.

39  
40  
41 After receiving the diagnosis, we selected a population of patients with lung cancer and  
42 divided them into groups of patients with different cancer types detectable with bronchoscopic  
43 procedure (squamous cell lung cancer, adenocarcinoma, large cell carcinoma, not otherwise  
44  
45  
46  
47  
48  
49  
50  
51  
52  
53  
54  
55  
56  
57  
58  
59  
60

1  
2  
3 specified NSCLC, and small cell lung cancer). Then, we assessed the prevalence of different  
4 types of LC in the materials obtained with various bronchoscopic procedures.  
5

6 Clinical and demographic factors were analyzed using the Pearson's Chi-square test. P-  
7 values below 0.05 were considered significant. The percentages reflect the relative number of  
8 all lung cancer patients diagnosed with a particular procedure. We only analyzed the results of  
9 the first-time bronchoscopy, that could be nondiagnostic. The evaluation of relative diagnostic  
10 yield (sensitivity) of different bronchoscopic procedures could not be done because, in our  
11 study, it was not possible to verify the final diagnosis of patients in the materials collected  
12 during the next bronchoscopy or another procedures (this applies mainly to patients with lung  
13 tumor or hilar lymphadenopathy). The following diagnostic procedures were carried out in  
14 various clinical centers throughout Poland. Therefore, we were unable to verify the diagnoses  
15 obtained later.  
16

17 Patient and Public involvement statement: Patients were not involved in research.  
18

19 The protocol of the study was approved by the Committee of Ethics and Research at the  
20 Medical University of Lublin (KE-0254/5/2018).  
21

## 22 **Results**

23 In 3565 (67.5%) patients, EBUS-TBNA and transesophageal EUS-FNA was performed  
24 and cytological material was archived in a cellblock. In 1346 (25.5%) patients, EBUS-TBNA  
25 (without EUS-FNA) was the only diagnostic procedure. In the remaining patients, EBUS-  
26 TBNA was supplemented by EUS-FNA. There were no patients in whom EUS-FNA would be  
27 the only diagnostic method. 1714 (32.5%) patients had non-ultrasound-guided bronchoscopy  
28 with the forceps biopsy of endobronchial lesions allowing to obtain a small histological  
29 specimen.  
30

31 Lung cancer was confirmed in a group of 1923 (36.42%) patients, including 1280 men  
32 and 643 women. Reactive lymph nodes were found in 16.06% of the patients, sarcoidosis was  
33 diagnosed in 4.13%, idiopathic pulmonary fibrosis – in 0.19%, metastases to the lungs from  
34 other organs – in 2.39% of the patients. 40.81% of the patients had no definitive diagnosis  
35 (Figure 1). Lung cancer was confirmed in 51% of patients with suspected tumor in computed  
36 tomography. While, in the group of patients with hilar lymphadenopathy, lung cancer was  
37 diagnosed in only 10.1% of cases.  
38

39 Among those with lung cancer, squamous cell carcinoma (32.07%) was most often  
40 diagnosed, then adenocarcinoma (30.61%), small cell lung cancer (25.83%) and NSCLC-NOS  
41  
42  
43  
44  
45  
46  
47  
48  
49  
50  
51  
52  
53  
54  
55  
56  
57  
58  
59  
60

1  
2  
3 (11.49%) (Figure 2). SCLC and AC were significantly more frequent ( $\chi^2 = 8.649$ ,  $p = 0.0033$   
4 and  $\chi^2 = 21.128$ ,  $p < 0.000005$ , respectively) in women (29.97% and 37.42% of women with  
5 lung cancer) than in men (23.75% and 27.19% of male patients with lung cancer). Squamous  
6 cell carcinoma appeared significantly more often ( $\chi^2 = 41.881$ ,  $p < 0.000001$ ) among male  
7 (36.95%) than among female (22.36%) patients with lung cancer (Figure 3). SCC was  
8 significantly more often ( $\chi^2 = 4.17$ ,  $p = 0.041$ ) diagnosed in the group of patients older than 65  
9 years than in younger patients. Other pathomorphological types of lung cancer occurred with  
10 similar frequency in these two age groups.  
11

12  
13  
14  
15  
16  
17 Endobronchial biopsies significantly more often ( $\chi^2 = 7.566$ ,  $p = 0.0059$ ) provided  
18 material for the diagnosis of lung cancer than the EBUS-TBNA and EUS-FNA procedures.  
19 42.35% of endobronchial biopsies and 33.6% of TBNA and FNA provided material sufficient  
20 to diagnose lung cancer. Fine needle biopsy of lymph nodes enabled the diagnosis of lung  
21 cancer in 29.2% of cases, fine needle biopsy of lung tumor – in 66.6% of cases, and forceps  
22 biopsy of bronchial mucosa lesions – in 48.2% of cases. These differences were statistically  
23 significant.  
24

25  
26  
27  
28  
29 Among patients with lung cancer, TBNA or FNA compared to endobronchial biopsies  
30 gave a similar result ( $\chi^2 = 0.656$ ,  $p = 0.418$ ) in detection of SCLC (26.5% vs. 24.8%). On the  
31 other hand, the diagnosis of AC and NSCLC-NOS was obtained significantly more frequently  
32 ( $\chi^2 = 20.394$ ,  $p = 0.000006$  and  $\chi^2 = 3.902$ ,  $p = 0.0482$ ) in EBUS-TBNA and EUS-FNA  
33 compared to endobronchial biopsies (34.3% vs. 24.52% and 12.6% vs. 9.6%, respectively).  
34 SCC, among other lung cancer types detected by bronchoscopy, was diagnosed in 41.77% in  
35 materials obtained by forceps biopsy and only in 26.62% in materials with EBUS-TBNA or  
36 EUS-FNA ( $\chi^2 = 43.143$ ,  $p < 0.000001$ ), which was directly related to the more frequent central  
37 location and bronchial infiltration of this type of tumor. Computed tomography showed that in  
38 79% of SCC patients the tumor was centrally located in the large bronchi. The analysis of  
39 bronchoscopic images showed that tumor deformed the bronchial mucosa or showed  
40 endobronchial growth in 67% of SCC patients. (Figure 4). Table 1 shows the results of  
41 bronchoscopy procedures in the diagnosis of individual pathomorphological types of lung  
42 cancer depending on place of collecting the material.  
43  
44  
45  
46  
47  
48  
49  
50  
51  
52  
53

## 54 Discussion

55  
56  
57 Our study on the results of EBUS-TBNA/EUS-FNA and forceps biopsy in obtaining  
58 materials for the diagnosis of various lung diseases is among the largest worldwide. The study  
59 points to numerous problems arising from the use of these techniques in routine clinical  
60

1  
2  
3 practice. We are aware of the many limitations of our study. First, we cannot determine the  
4 sensitivity and specificity of our methods, because it was not possible to determine the final  
5 diagnosis in such a large group of patients (5 279 cases). In addition, we could not distinguish  
6 between material collected by EBUS-TBNA and EUS-FNA. We do not know how many lung  
7 cancer patients were diagnosed only in the material from EBUS-TBNA or only in the material  
8 from EUS-FNA, or in both types of these materials. We also do not know the number of biopsies  
9 performed during one bronchoscopy. This data is missing from the results of the  
10 pathomorphological examination that we analyzed. Thirdly, diagnosis of large cell carcinoma  
11 was not possible in small specimens (LCC was probably qualified to the NSCLC-NOS group).  
12 A limitation of our study was also the lack of detailed clinical and radiological characteristics  
13 of all patients who underwent bronchoscopy procedures.  
14  
15

16  
17 However, we found that advanced small cell lung cancer may be more common in  
18 Poland than previously thought. This tumor is characterized by rapid growth and metastases,  
19 therefore, more often it could be diagnosed in advanced stages using bronchoscopic techniques.  
20 SCLC diagnosis in EBUS-TBNA/EUS-FNA of lymph nodes and endobronchial biopsy occurs  
21 at the same frequency. Furthermore, the difference in the percentage of patients with squamous  
22 cell carcinoma and adenocarcinoma diagnosed with endobronchial biopsies and TBNA or FNA  
23 is noteworthy. In our study, most patients with adenocarcinoma were diagnosed with EBUS-  
24 TBNA or EUS-FNA of lymph nodes, while patients with squamous cell carcinoma were  
25 diagnosed more often based on examination of material from endobronchial biopsy (forceps  
26 biopsy). Patients in cohort with squamous cell carcinoma were more likely to have  
27 endobronchial disease accessible by forceps. Therefore we could not ascertain that  
28 endobronchial biopsy is more effective for diagnosis of squamous cell lung cancer as there was  
29 no comparison to EBUS-TBNA and EUS-FNA for those patients. Thus, we point to the problem  
30 that results of bronchoscopic procedures depends on the location of the primary tumor and the  
31 presence of metastases in the lymph nodes.  
32  
33

34  
35 Schmid-Bindert et al. showed how often they detected different pathomorphological  
36 types of lung cancer using various bronchoscopic methods. Small biopsies were collected by  
37 three different methods: forceps biopsy (44.6%), EBUS-TBNA (32.7%), and CT-guided core  
38 biopsy (22.8%). 38% of adenocarcinoma, 51% of squamous cell carcinoma and 11% of NSCLC  
39 NOS were diagnosed using forceps biopsy. EBUS-TBNA results were as follows: 45% of  
40 adenocarcinoma, 30% of squamous cell carcinoma and 24% of NSCLC NOS. [12]  
41  
42

43  
44 Many authors emphasize that the diagnosis of NSCLC NOS is the most common in the  
45 case of material obtained from EBUS-TBNA. Esterbrook et al. found that NSCLC-NOS rate  
46  
47  
48  
49  
50  
51  
52  
53  
54  
55  
56  
57  
58  
59  
60



1  
2  
3 was 20.8% in EBUS-TBNA samples. Similar results were achieved by Navani et al. In group  
4 of 774 patients with known or suspected lung cancer, 23% of patients had a final diagnosis of  
5 NSCLC NOS. [13, 14] Our study confirmed the high percentage of NSCLC NOS patients  
6 diagnosed with EBUS-TBNA procedures. Endobronchial biopsy was less likely to provide a  
7 diagnosis of NSCLC NOS.  
8  
9

10  
11  
12 Chin et al. reported that EBUS-TBNA is the most sensitive diagnostic method for SCLC  
13 detection, because it allows to sample specimens from mediastinal as well as submucosal  
14 lesions. They also mentioned that the quality of specimens obtained by needle aspiration is  
15 better than by forceps biopsies, which may contain crushed artifacts. [15] In addition, other  
16 studies noticed that the sensitivity of EBUS-TBNA for SCLC detection was higher than for  
17 NSCLC diagnosis. [16, 17] Our findings confirmed the above statements. The majority of  
18 SCLC cases were diagnosed with EBUS-TBNA. Three SCLC patients were diagnosed from  
19 metastatic lesions in the adrenal gland using transesophageal EUS-FNA.  
20  
21  
22  
23  
24

25  
26 Many authors raise the problem that forceps biopsy has low sensitivity in the diagnosis  
27 of lung cancer. Forceps biopsy has a diagnostic yield ranging between 65-82%. In preliminary  
28 study by Pasko et al. conducted in 212 patients with lung cancer suspicion, authors compared  
29 sensitivity and accuracy of routine bronchoscopy techniques: endobronchial biopsy, EBUS-  
30 TBNA, and combination of EBUS-TBNA and EUS-FNA. Sensitivity and accuracy of  
31 endobronchial biopsy vs EBUS-TBNA vs combination of transbronchial biopsies were 43% vs  
32 44.3% vs 93.7% and 93.8% vs 94.7% and 94.8%, respectively. This demonstrates high  
33 usefulness of the combination of EBUS-TBNA and EUS-FNA in the diagnosis of lung cancer  
34 [18]. Verma et al. demonstrated sensitivity of EBUS-TBNA in cancer diagnosis of 91.4% in  
35 small group of 37 patients with lesions located adjacent to the trachea or lesions located adjacent  
36 to the main bronchi. [19] Tournoy et al. indicated that EBUS-TBNA has a sensitivity of 82%  
37 and low negative predictive value (23%). [20] The similar results were received by Zhao et al.  
38 for lesions located near the central airways. [21] Oki et al. showed that the combined endoscopic  
39 method with EBUS-TBNA and EUS-FNA with a single bronchoscope gives better results in  
40 staging of NSCLC, than each technique alone. However, they mentioned that significant  
41 number of patients had false-negative EBUS-TBNA and EUS-FNA results. Moreover Oki et  
42 al. suggested that very important issue is bronchoscopists experience, which may cause  
43 differences in the results. [22] On the other hand, Wallace et al. showed a EBUS-TBNA  
44 sensitivity of only 69% in a group of 150 patients with lung cancer suspicion. [23]  
45  
46  
47  
48  
49  
50  
51  
52  
53  
54  
55  
56  
57

58  
59 Despite relatively low negative predictive value of EBUS-TBNA, there is an indication  
60 to perform other procedures (e.g., surgical procedures) for final diagnosis in a significant group

1  
2  
3 of patients. In our study, 56.9% of patients who underwent bronchoscopy did not receive a  
4 definitive diagnosis of the diseases and they have been subjected to other diagnostic procedures  
5 or observations. We showed the results of all performed bronchoscopies and three different  
6 methods of material collection (endobronchial biopsy and combination EBUS-TBNA and EUS-  
7 FNA). Moreover, unselected and heterogeneous patients were recruited in three different  
8 hospitals that employ a total of 8 bronchoscopists. In most studies, the evaluation of the  
9 usefulness of EBUS-TBNA and EUS-FNA for detecting malignancy was conducted in selected  
10 patients with high clinical suspicion of the tumor. Small, preselected groups of patients with  
11 high risk of lung cancer could be the reason of the low negative predictive value of  
12 bronchoscopic procedures in these studies. Thus, these observations may not reflected the real  
13 clinical situation.  
14  
15  
16  
17  
18  
19  
20  
21

22 In studies where population was heterogenic regarding the disease (lung cancer,  
23 sarcoidosis, tuberculosis), EBUS-TBNA had diagnostic value only in 60-75% of patients. [24]  
24 Lange et al. showed diagnostic results of EBUS-TBNA in only 61.4% of unselected patients  
25 undergoing routine diagnostic procedures. [25] Fournier et al. examined 185 patients with  
26 extrathoracic malignancy and mediastinal lymphadenopathy in real life practice.  
27 Pathomorfological types of malignancy were successfully identified using EBUS-TBNA in  
28 only 93 patients (50.3%). The diagnostic sensitivity, specificity, negative predictive value, and  
29 positive predictive value were 68.4%, 100%, 53.3%, and 100%, respectively. [26] Murthi et al  
30 conducted research comparing the accuracy of EBUS-TBNA to surgery in diagnosis of hilar  
31 and mediastinal pathologies. EBUS-TBNA for all pathologies had an accuracy of 81.2% and  
32 sensitivity of 55.1%. [27]  
33  
34  
35  
36  
37  
38  
39  
40  
41  
42

### 43 **Conclusions**

44 Comparing all these data, we could conclude that bronchoscopy is vital but not an ideal  
45 technique in the routine diagnosis of respiratory diseases. Our study showed that 41% of  
46 bronchoscopy materials were insufficient to perform reliable pathomorphological examination.  
47 This mainly concerned patients with suspected lung tumor or lymphadenopathy. The use of  
48 brush biopsy, forceps biopsy, bronchoaspirate analysis EBUS-TBNA and EUS-FNA  
49 simultaneously, if desired, was of the highest diagnostic value. However, sometimes this fails  
50 and bronchoscopy must be repeated, or thoracic procedures (e.g. mediastinoscopy or  
51 thoracoscopy) must be performed. We found that the EBUS-TBNA value in daily clinical  
52 practice differed from that in clinical trials. Therefore, precise estimation of the frequency of  
53 individual pathomorphological types of lung cancer, based on material obtained  
54  
55  
56  
57  
58  
59  
60

1  
2  
3 bronchoscopically, is not possible. However, EBUS-TBNA plays an essential role in staging of  
4  
5  
6  
7  
8  
9  
10  
11  
12  
13  
14  
15  
16  
17  
18  
19  
20  
21  
22  
23  
24  
25  
26  
27  
28  
29  
30  
31  
32  
33  
34  
35  
36  
37  
38  
39  
40  
41  
42  
43  
44  
45  
46  
47  
48  
49  
50  
51  
52  
53  
54  
55  
56  
57  
58  
59  
60

bronchoscopically, is not possible. However, EBUS-TBNA plays an essential role in staging of  
invasive lung cancer. Therefore, its value in the diagnosis of lung cancer is not limited to  
demonstrating the presence of cancer type, but, above all, to determining the extent of the  
disease and qualification for appropriate treatment. It seems that the incidence of lung cancer  
with a typical peripheral localization (adenocarcinoma) may be underestimated in comparison  
to the incidence of lung cancer with a typical central localization (squamous cell carcinoma,  
SCLC), when bronchoscopy is used as the primary diagnostic method.

#### Authorship contribution statement:

Conception and design of the study: JB, MF, PK, JP. Administrative support: PK, JP, AP, JB,  
AS, JS, MM, PK, RK, JM. Provision of study material or patients: JP, AP, JB, AS, JS, MM,  
PK, RK, JM. Collection and assembly of data: JB, MF, PK, JP, AP, JB, AS, JS, MM, PK, RK.  
Data analysis and interpretation: JB, MF, PK. Manuscript writing: JB, MF, PK. All authors  
gave final approval of the published manuscript.

#### Data Availability Statement:

The data that supports the findings of this study are available from the corresponding author  
upon reasonable request.

#### Conflicts of Interest:

The authors declare no potential conflicts of interest.

#### Fundings:

This research did not receive any specific grant from funding agencies in the public,  
commercial, or not-for-profit sectors.

#### Acknowledgements:

The authors would like to thank prof. Tadeusz Orłowski and prof. Maciej Krzakowski for  
their helpful comments that improved the research and manuscript.

#### References

1. Siegel RL, Miller KD, Jemal A. Cancer Statistics. CA Cancer J Clin. 2017; 67: 7-30.

- 1  
2  
3 2. Travis WD, Brambilla E, Burke AP, et al. Introduction to the 2015 World Health  
4 Organization Classification of Tumors of the Lung, Pleura, Thymus, and Heart. *Thorac*  
5 *Oncol.* 2015; 10: 1240-1242.
- 6  
7  
8 3. Bray F, Ferlay J, Soerjomataram I, et al. Global Cancer Statistics 2018: GLOBOCAN  
9 estimates of incidence and mortality worldwide for 36 cancers in 185 countries. *CA*  
10 *Cancer J Clin.* 2018; 68: 394-424.
- 11  
12 4. Houston KA, Henley SJ, Li J, et al. Patterns in lung cancer incidence rates and trends by  
13 histologic type in the United States, 2004-2009. *Lung Cancer.* 2014; 86: 22-28.
- 14  
15 5. Zugazagoitia J, Enguita AB, Nuñez JA, Iglesias L, Ponce S. The new IASLC/ATS/ERS  
16 lung adenocarcinoma classification from a clinical perspective: current concepts and  
17 future prospects. *J Thorac Dis.* 2014;6(Suppl 5): S526-S536
- 18  
19 6. Vilmann P, Clementsen PF, Colella S, et al. Combined endobronchial and oesophageal  
20 endosonography for the diagnosis and staging of lung cancer. European Society of  
21 Gastrointestinal Endoscopy (ESGE) Guideline, in cooperation with the European  
22 Respiratory Society (ERS) and the European Society of Thoracic Surgeons (ESTS). *Eur*  
23 *Respir J.* 2015; 46: 40-60.
- 24  
25 7. Gomez-Caro A, Garcia S, Reguart N, Arguis P, Sanchez M et al. Incidence of occult  
26 mediastinal node involvement in cN0 non-small-cell lung cancer patients after negative  
27 uptake of positron emission tomography/computer tomography scan. *Eur J Cardiothorac*  
28 *Surg.* 2010; 37: 1168-1174.
- 29  
30 8. Watanabe S, Asamura H, Suzuki K, Tsuchiya R. Problems in diagnosis and surgical  
31 management of clinical N1 non-small cell lung cancer. *Ann Thorac Surg.* 2005; 79: 1682-  
32 1685
- 33  
34 9. Rivera MP, Wahidi MM, Mehta AC. Establishing the diagnosis of lung cancer: Diagnosis  
35 and management of lung cancer, 3rd ed: American College of Chest Physicians evidence-  
36 based clinical practice guidelines. *Chest.* 2013; 143: 142-165.
- 37  
38 10. Micames CG, McCrory DC, Pavey DA, et al. Endoscopic ultrasound-guided fine-needle  
39 aspiration for non-small cell lung cancer staging: A systematic review and meta-analysis.  
40 *Chest.* 2007. 131: 539-548.
- 41  
42 11. Sutedja TG, Codrington H, Risse EK, et al. Autofluorescence bronchoscopy improves  
43 staging of radiographically occult lung cancer and has an impact on therapeutic strategy.  
44 *Chest.* 2001. 120: 1327-1332.
- 45  
46 12. Schmid-Bindert G, Wang Y, Jiang H, et al. EBUS-TBNA provides highest RNA yield for  
47 multiple biomarker testing from routinely obtained small biopsies in non-small cell lung  
48  
49  
50  
51  
52  
53  
54  
55  
56  
57  
58  
59  
60

- 1  
2  
3 cancer patients - a comparative study of three different minimal invasive sampling  
4 methods. *PLoS One*. 2013; 8: 77948.  
5  
6  
7 13. Navani N, Brown JM, Nankivell M, et al. Suitability of EBUS-TBNA specimens for  
8 subtyping and genotyping of NSCLC: a multi-centre study of 774 patients. *Am J Respir*  
9 *Crit Care Med*. 2012; 185: 1316-1322.  
10  
11 14. Esterbrook G, Anathhanam S, Plant PK. Adequacy of endobronchial ultrasound  
12 transbronchial needle aspiration samples in the subtyping of non-small cell lung cancer.  
13 *Lung Cancer*. 2013; 80: 30-34.  
14  
15 15. Chin R Jr, Cappellari JO, McCain TW, et al. Increasing use of bronchoscopic needle  
16 aspiration to diagnose small cell lung cancer. *Mayo Clin Proc*. 2000; 75: 796-801.  
17  
18 16. Fernandez-Villar A, Botana M, Leiro V, et al. Validity and reliability of transbronchial  
19 needle aspiration for diagnosing mediastinal adenopathies. *BMC Pulm Med*. 2010; 10: 24.  
20  
21 17. Sharafkhaneh A, Baaklini W, Gorin AB, et al. Yield of transbronchial needle aspiration in  
22 diagnosis of mediastinal lesions. *Chest*. 2003; 124: 2131-2135.  
23  
24 18. Pasko E, Serafin-Bromblik J, Piekorz W, et al. Combined endobronchial and endoscopic  
25 ultrasound-guided needle aspiration performed by single ultrasound bronchoscopes routine  
26 videobronchoscopy for diagnosis of advanced lung cancer – a prospective study. *Eur Respir J*.  
27 2016; 48: 2034.  
28  
29 19. Verma A, Jeon K, Koh WJ, et al. Endobronchial ultrasound-guided transbronchial needle  
30 aspiration for the diagnosis of central lung parenchymal lesions. *Yonsei Med J*. 2013; 54:  
31 672-678.  
32  
33 20. Tournoy KG, Rintoul RC, van Meerbeeck JP, et al. EBUS-TBNA for the diagnosis of  
34 central parenchymal lung lesions not visible at routine bronchoscopy. *Lung Cancer*. 2009;  
35 63: 45-49.  
36  
37 21. Zhao H, Xie Z, Zhou ZL, et al. Diagnostic value of endobronchial ultrasound-guided  
38 transbronchial needle aspiration in intrapulmonary lesions. *Chin Med J*. 2013; 126: 4312-  
39 4315.  
40  
41 22. Oki M, Saka H, Ando M, et al. Endoscopic ultrasound-guided fine needle aspiration and  
42 endobronchial ultrasound-guided transbronchial needle aspiration: Are two better than one  
43 in mediastinal staging of non-small cell lung cancer? *J Thorac Cardiovasc Surg*. 2014;  
44 148: 1169-1177.  
45  
46 23. Wallace MB, Pascual JM, Raimondo M, et al. Minimally invasive endoscopic staging of  
47 suspected lung cancer. *JAMA*. 2008; 299: 540-546.  
48  
49  
50  
51  
52  
53  
54  
55  
56  
57  
58  
59  
60

- 1  
2  
3 24. Madan K, Mohan A, Ayub II, et al. Initial experience with endobronchial ultrasound-guided transbronchial needle aspiration (EBUS-TBNA) from a tuberculosis endemic population. *J Bronchol Interv Pulmonol*. 2014; 21: 208-214.
- 4  
5  
6  
7  
8 25. Lange T, Kunzendorf F, Pfeifer M, et al. Endobronchial ultrasound-guided transbronchial needle aspiration in routine care-plenty of benign results and follow-up tests. *Int J Clin Pract*. 2012; 66: 438-445.
- 9  
10  
11  
12  
13 26. Fournier C, Hermant C, Gounant V, et al. Diagnostic of mediastinal lymphadenopathy in extrathoracic cancer: a place for EBUS-TBNA in real life practice? *Respir Med Res*. 2019; 75: 1–4.
- 14  
15  
16  
17  
18 27. Murthi M, Donna E, Arias S, et al. Diagnostic Accuracy of Endobronchial Ultrasound-Guided Transbronchial Needle Aspiration (EBUS-TBNA) in Real Life. *Front Med (Lausanne)*. 2020; 7:118.
- 19  
20  
21  
22  
23  
24  
25

26  
27 Table 1. The results of varies techniques during bronchoscopy in the diagnosis of individual pathomorphological types of lung cancer depending on place of collecting the material and nodal station.

28  
29  
30  
31

| Material                                      | SCLC        | Adenocarcinoma | Squamous cell carcinoma | NOS         | Total lung cancer |
|-----------------------------------------------|-------------|----------------|-------------------------|-------------|-------------------|
| EBUS-TBNA/EUS-FNA of lymph nodes              | 250 (27.7%) | 331 (36.7%)    | 209 (23.1%)             | 114 (12.5%) | 904 (100%)        |
| EBUS-TBNA/EUS-FNA of tumor                    | 88 (24.7%)  | 94 (25.8%)     | 135 (37.2%)             | 44 (12.3%)  | 361 (100%)        |
| EBUS-TBNA/EUS-FNA metastases to adrenal gland | 3 (42.9%)   | 1 (14.3%)      | 2 (28.6%)               | 1 (14.3%)   | 7 (100%)          |

32  
33  
34  
35  
36  
37  
38  
39  
40  
41  
42  
43  
44  
45  
46  
47  
48  
49  
50  
51  
52  
53  
54  
55  
56  
57  
58  
59  
60

|                         |           |           |             |           |            |
|-------------------------|-----------|-----------|-------------|-----------|------------|
| Forceps biopsy of tumor | 156 (22%) | 163 (25%) | 270 (41.5%) | 62 (9.5%) | 651 (100%) |
|-------------------------|-----------|-----------|-------------|-----------|------------|

Figure 1. Results of pathomorphological examination carried out on material obtained from 5279 bronchoscopies (entire study population)

Figure 2. The incidence of individual pathomorphological types of LC in the entire study group of lung cancer patients

Figure 3. The incidence of individual pathomorphological types of LC according to the gender of patients with lung cancer

Figure 4. Percentage of patients with different types of lung cancer detected in materials collected with different bronchoscopic techniques. Frequency of different types of lung cancer was calculated in the whole group of patients undergoing a given bronchoscopic procedure (100%), which resulted in the diagnosis of lung cancer



Figure 1. Results of pathomorphological examination carried out on material obtained from 5279 bronchoscopies (entire study population)

108x60mm (300 x 300 DPI)



1  
2  
3  
4  
5  
6  
7  
8  
9  
10  
11  
12  
13  
14  
15  
16  
17  
18  
19  
20  
21  
22  
23  
24  
25  
26  
27  
28  
29  
30  
31  
32  
33  
34  
35  
36  
37  
38  
39  
40  
41  
42  
43  
44  
45  
46  
47  
48  
49  
50  
51  
52  
53  
54  
55  
56  
57  
58  
59  
60



Figure 2. The incidence of individual pathomorphological types of LC in the entire study group of lung cancer patients

296x209mm (300 x 300 DPI)

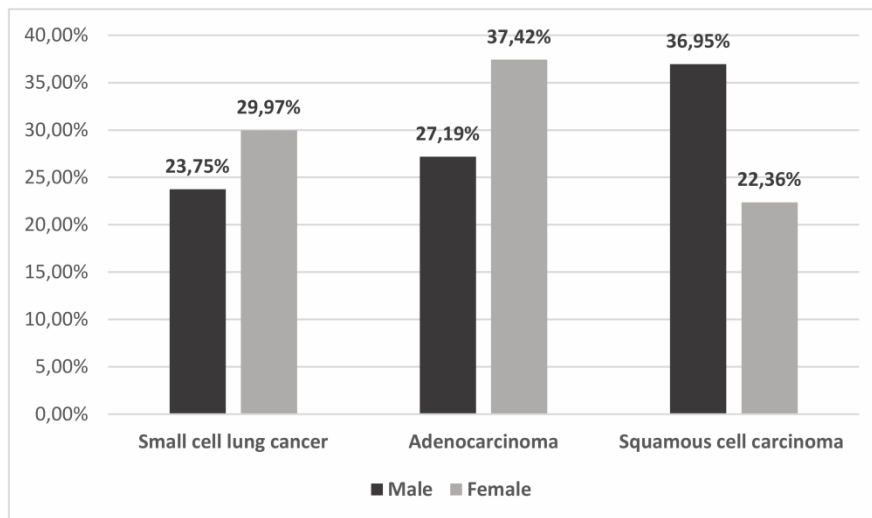

Figure 3. The incidence of individual pathomorphological types of LC according to the gender of patients with lung cancer

296x209mm (300 x 300 DPI)

1  
2  
3  
4  
5  
6  
7  
8  
9  
10  
11  
12  
13  
14  
15  
16  
17  
18  
19  
20  
21  
22  
23  
24  
25  
26  
27  
28  
29  
30  
31  
32  
33  
34  
35  
36  
37  
38  
39  
40  
41  
42  
43  
44  
45  
46  
47  
48  
49  
50  
51  
52  
53  
54  
55  
56  
57  
58  
59  
60



Figure 4. Percentage of patients with different types of lung cancer detected in materials collected with different bronchoscopic techniques. Frequency of different types of lung cancer was calculated in the whole group of patients undergoing a given bronchoscopic procedure (100%), which resulted in the diagnosis of lung cancer

296x209mm (300 x 300 DPI)

STROBE Statement—Checklist of items that should be included in reports of *cohort studies*

|                              | Item No | Recommendation                                                                                                                                                                                    | Page No |
|------------------------------|---------|---------------------------------------------------------------------------------------------------------------------------------------------------------------------------------------------------|---------|
| <b>Title and abstract</b>    | 1       | (a) Indicate the study's design with a commonly used term in the title or the abstract                                                                                                            | 2       |
|                              |         | (b) Provide in the abstract an informative and balanced summary of what was done and what was found                                                                                               | 2       |
| <b>Introduction</b>          |         |                                                                                                                                                                                                   |         |
| Background/rationale         | 2       | Explain the scientific background and rationale for the investigation being reported                                                                                                              | 4-5     |
| Objectives                   | 3       | State specific objectives, including any prespecified hypotheses                                                                                                                                  | 6       |
| <b>Methods</b>               |         |                                                                                                                                                                                                   |         |
| Study design                 | 4       | Present key elements of study design early in the paper                                                                                                                                           | 6-7     |
| Setting                      | 5       | Describe the setting, locations, and relevant dates, including periods of recruitment, exposure, follow-up, and data collection                                                                   | 6-7     |
| Participants                 | 6       | (a) Give the eligibility criteria, and the sources and methods of selection of participants. Describe methods of follow-up                                                                        | 6-7     |
|                              |         | (b) For matched studies, give matching criteria and number of exposed and unexposed                                                                                                               | 6-7     |
| Variables                    | 7       | Clearly define all outcomes, exposures, predictors, potential confounders, and effect modifiers. Give diagnostic criteria, if applicable                                                          | 6-7     |
| Data sources/<br>measurement | 8*      | For each variable of interest, give sources of data and details of methods of assessment (measurement). Describe comparability of assessment methods if there is more than one group              | 6-7     |
| Bias                         | 9       | Describe any efforts to address potential sources of bias                                                                                                                                         | 6-7     |
| Study size                   | 10      | Explain how the study size was arrived at                                                                                                                                                         | 6-7     |
| Quantitative variables       | 11      | Explain how quantitative variables were handled in the analyses. If applicable, describe which groupings were chosen and why                                                                      | 6-7     |
| Statistical methods          | 12      | (a) Describe all statistical methods, including those used to control for confounding                                                                                                             | 6-7     |
|                              |         | (b) Describe any methods used to examine subgroups and interactions                                                                                                                               |         |
|                              |         | (c) Explain how missing data were addressed                                                                                                                                                       |         |
|                              |         | (d) If applicable, explain how loss to follow-up was addressed                                                                                                                                    |         |
|                              |         | (e) Describe any sensitivity analyses                                                                                                                                                             |         |
| <b>Results</b>               |         |                                                                                                                                                                                                   |         |
| Participants                 | 13*     | (a) Report numbers of individuals at each stage of study—eg numbers potentially eligible, examined for eligibility, confirmed eligible, included in the study, completing follow-up, and analysed | 8       |
|                              |         | (b) Give reasons for non-participation at each stage                                                                                                                                              |         |
|                              |         | (c) Consider use of a flow diagram                                                                                                                                                                |         |
| Descriptive data             | 14*     | (a) Give characteristics of study participants (eg demographic, clinical, social) and information on exposures and potential confounders                                                          | 8       |
|                              |         | (b) Indicate number of participants with missing data for each variable of interest                                                                                                               |         |
|                              |         | (c) Summarise follow-up time (eg, average and total amount)                                                                                                                                       |         |
| Outcome data                 | 15*     | Report numbers of outcome events or summary measures over time                                                                                                                                    | 8       |

|    |                          |    |                                                                                                                                                                                                              |       |
|----|--------------------------|----|--------------------------------------------------------------------------------------------------------------------------------------------------------------------------------------------------------------|-------|
| 1  | Main results             | 16 | (a) Give unadjusted estimates and, if applicable, confounder-adjusted estimates and their precision (eg, 95% confidence interval). Make clear which confounders were adjusted for and why they were included | 8     |
| 2  |                          |    | (b) Report category boundaries when continuous variables were categorized                                                                                                                                    |       |
| 3  |                          |    | (c) If relevant, consider translating estimates of relative risk into absolute risk for a meaningful time period                                                                                             |       |
| 4  | Other analyses           | 17 | Report other analyses done—eg analyses of subgroups and interactions, and sensitivity analyses                                                                                                               | -     |
| 5  | <b>Discussion</b>        |    |                                                                                                                                                                                                              |       |
| 6  | Key results              | 18 | Summarise key results with reference to study objectives                                                                                                                                                     | 9     |
| 7  | Limitations              | 19 | Discuss limitations of the study, taking into account sources of potential bias or imprecision. Discuss both direction and magnitude of any potential bias                                                   | 9     |
| 8  | Interpretation           | 20 | Give a cautious overall interpretation of results considering objectives, limitations, multiplicity of analyses, results from similar studies, and other relevant evidence                                   | 10-11 |
| 9  | Generalisability         | 21 | Discuss the generalisability (external validity) of the study results                                                                                                                                        | 12    |
| 10 | <b>Other information</b> |    |                                                                                                                                                                                                              |       |
| 11 | Funding                  | 22 | Give the source of funding and the role of the funders for the present study and, if applicable, for the original study on which the present article is based                                                | 13    |

\*Give information separately for exposed and unexposed groups.

**Note:** An Explanation and Elaboration article discusses each checklist item and gives methodological background and published examples of transparent reporting. The STROBE checklist is best used in conjunction with this article (freely available on the Web sites of PLoS Medicine at <http://www.plosmedicine.org/>, Annals of Internal Medicine at <http://www.annals.org/>, and Epidemiology at <http://www.epidem.com/>). Information on the STROBE Initiative is available at <http://www.strobe-statement.org>.
